1 Main Title:

2 **Lipidomics analysis of juveniles' blue mussels (*Mytilus edulis* L. 1758), a key economic and**  
3 **ecological species.**

4

5 Short title:

6 **Lipidomics on blue mussels**

7

8 Authors:

9 Vincenzo Alessandro Laudicella<sup>a\*</sup>, Christine Beveridge<sup>a</sup>, Stefano Carboni<sup>c</sup>, Sofia Cota Franco<sup>a</sup>, Mary K.

10 Doherty<sup>b</sup>, Nina Long<sup>a</sup>, Elaine Mitchell<sup>a</sup>, Michelle S. Stanley<sup>a</sup>, Philip D. Whitfield<sup>b</sup>, Adam D. Hughes<sup>a</sup>.

11

12 Affiliations:

13 <sup>a</sup> *Scottish Association for Marine Sciences, Dunstaffnage Marine Laboratory, PA37 1QA, Oban, UK.*

14 <sup>b</sup> *Division of Biomedical Sciences, University of the Highlands and Islands, Centre for Health Sciences, Old Perth*  
15 *Road, IV2 3JH, Inverness, UK.*

16 <sup>c</sup> *Institute of Aquaculture, Faculty of Natural Sciences, University of Stirling, Pathfoot Building, FK9 4LA, Stirling,*  
17 *UK.*

18 \* Corresponding author. [alessandro.laudicella@sams.ac.uk](mailto:alessandro.laudicella@sams.ac.uk)/[alessandro.laudicella@gmail.com](mailto:alessandro.laudicella@gmail.com);

19

20 **Abstract**

21 Blue mussels (*Mytilus edulis* L.) are important components of coastal ecosystems functioning  
22 through benthopelagic coupling and ecosystem engineering. At the same time, mussel production is  
23 central in the economy of coastal areas. Therefore, understanding their nutritional, physiological and  
24 metabolic processes at key life stages is important for their management, both within food  
25 production systems and in wild populations.

26 Lipids are crucial molecules for bivalve growth, but their diversity and roles have been considered  
27 from fatty acid (FA) perspective. In this paper, we applied lipidomics to bivalve nutrition. Lipidomics  
28 provides a holistic perspective on lipid patterns; by examining the lipidome, important physiological  
29 information can be acquired. Here, we use controlled laboratory experiments to elucidate the  
30 responses to changes in the diet of newly settled mussels juveniles, one of the most critical life  
31 stages. The diets considered in this study are single strains diet of *Cylindrotheca fusiformis* CCAP  
32 1017/2 – CYL, *Isochrysis galbana* CCAP 927/1– ISO, *Monodopsis subterranean* CCAP 848/1 – MONO,  
33 *Nannochloropsis oceanica* CCAP 849/10– NANNO and a commercial algae paste –SP.

34 The diets had a significant effect on spat GR and WI, and according to their efficacy resulted ranked  
35 as follows: ISO>NANNO/CYL>SP>MONO. Spat FA composition and neutral lipid content (principally  
36 triacylglycerols - TG), were influenced by the diets. Furthermore, untargeted lipidomics also showed  
37 shifts in several phospholipid species, with changes related to the essential PUFA available from the  
38 diet. TG content, neutral lipids and several TG and FA species were correlated (Spearman  $R^2 > 0.8$  FDR  
39  $p < 0.05$ ) with spat WI, suggesting their possible application as markers of mussel juvenile condition.

40 The availability of dietary essential PUFA deeply modified the spat lipidome both for neutral and for  
41 polar lipids. This change in the lipidome could have major impacts on their ecology and their  
42 production for food.

43

44

## 45 **1 Introduction**

46 Blue mussels (*Mytilus* sp.) are ecologically and economically important species, providing a range of  
47 crucial ecosystem services along with playing an important role in the economy of many rural and  
48 coastal regions [1]. The nutritional value of bivalves is also well documented, providing a source of  
49 protein, amino acids, vitamins, trace metals and poly-unsaturated fatty acids – PUFA [2, 3]. Globally,  
50 bivalve production accounted for over 15.5% of total aquaculture production in 2016 [4]. Being  
51 passive feeders, bivalves reduce the nutrient load in the water [5] whilst not requiring the use of  
52 feeds for growth (as observed in intensive culturing of finfish and shrimps [6]), such characteristic  
53 makes bivalve culture an environmentally sustainable solution to future food security scenarios [4,  
54 7-9]. Beside their role in nutrients' bioassimilation, mussels act as a filter for viruses, bacteria,  
55 detritus and phytoplankton [10], and as ecosystem engineers, creating shelter and substrate for  
56 other benthic organisms and increasing spatial complexity and biodiversity [11]. Furthermore,  
57 mussels are classic model organisms in ecotoxicological studies due to their nature of being sessile  
58 nature, their ubiquitous presence in the marine environment and their filter-feeding behaviour  
59 mechanism [12, 13].

60 European mussel production relies uniquely on natural recruitment events, defined "spatfalls". Yet,  
61 due to influences of environmental drivers [14-16], spatfalls are subjected to severe yearly  
62 fluctuations. Such Irregular recruitment, alongside with spreading of diseases, water quality  
63 classification and site licensing, is considered between the factors that are preventing the expansion  
64 of European mussel production [17, 18]. The establishment of commercial mussel hatcheries is a  
65 way to overcome some of these issues. Hatcheries can provide a continuous supply of juveniles to  
66 growers, resolving spatfall issues [19]. Nursery operations are a key stage for hatchery production of  
67 mussels, as the survival of mussel seedlings on-ropes depends on the size of spat at seeding stage  
68 [20-23]. Rearing newly settled mussel postlarvae in nurseries has significant effects on their survival  
69 when seeded on grow-out ropes, as it permits to reach a minimal size that ensures higher resistance  
70 towards the external environment [19]. However, feeding large amounts of spat in nurseries is

71 expensive, particularly in term of diet supply, as algae production alone accounts around 40% of  
72 hatchery costs for rearing bivalve juveniles [24]. Furthermore, juvenile stages are characterised by  
73 high production losses, which happen when the hatchery products have their greatest value.  
74 Therefore, elucidating the physiological and nutritional requirements of mussel juveniles gain a great  
75 importance for the development of industrial hatchery production of mussels and of mussel  
76 aquaculture production.

77 Early studies recognised lipids to be the main energy stores for bivalves up to 6 months post-  
78 settlement [25, 26]; Since then, evaluating the lipid composition of diets and juveniles gained a  
79 central importance on bivalve nutrition studies with examples available for clams [27-33], scallops  
80 [34-36], oysters [37-42] and mussels [19, 43-46]. Other than protein and carbohydrate composition,  
81 the nutritional properties of shellfish diets strongly depend on the essential PUFA (arachidonic acid –  
82 20:4n-6, AA; eicosapentaenoic acid – 20:5n-3, EPA; docosahexaenoic acid – 22:6n-3, DHA) content  
83 [47]. In spite of their ability to *de novo* synthesize lipids, bivalves have limited ability to elongate and  
84 desaturate C18 fatty acids (FA) to essential PUFA [27, 29, 48, 49]. FA desaturation requires energy;  
85 which could, in turn, penalise growth [30]. To date, a large part of the knowledge on lipids  
86 composition and roles in bivalve juvenile nutrition is based on FA analysis. However, this technique  
87 only captures a proportion of the lipidome, and lipids have a key role in organism physiology,  
88 ranging from biological membranes to cell signalling, immune responses and energy reserves [50].  
89 Current advances in technologies and analytical platforms allow for a deeper and global analysis of  
90 lipid molecular species, known as lipidomics. Lipidomics, a branch of metabolomics, encompasses  
91 the totality of biological lipids (the lipidome) of a living organism [51]. Lipidomics is mainly based on  
92 liquid chromatography coupled with mass spectrometry (LC-MS) platforms [52]. By working with  
93 liquid chromatography, information are obtained at lipid molecular species level, rather than on lipid  
94 sub-fractions (e.g. fatty acid) or lipid classes. By lipidomics, global changes on lipidome can be  
95 visualised, obtaining essential physiological information of the examined organisms [53].

96 The aim of this paper is to expand existing knowledge on lipid metabolism during nursery operation  
97 on mussel juveniles. As such, we applied a comprehensive lipid analysis strategy, which included FA  
98 profiling, lipid class analysis and untargeted lipidomics, to the evaluation of the effects of four single  
99 strain microalgae species and one commercial algae paste on newly settled *M. edulis* L. 1758. To our  
100 knowledge, this is the first time that such holistic lipid analysis approach is applied to bivalve  
101 juveniles.

## 102 **2 Materials and Methods**

### 103 **2.1 Spat collection and experimental design**

104 Newly settled *M. edulis* (shell length <10 mm) were obtained from Inverlussa Marine Services  
105 ([www.inverlussa.com](http://www.inverlussa.com); the Isle of Mull, West Coast of Scotland) in July 2017. Spat were collected via  
106 gentle scraping of spat collectors, bagged in plastic bags filled with seawater and transferred in ice to  
107 the aquarium facilities of SAMS. Upon arrival, the juveniles were graded onto a 4 mm mesh and then  
108 kept for 48 hrs on sand-filtered (Grade 1, EcoPure, Waterco) seawater, at room temperature with no  
109 food, to allow acclimation and depuration of the animals. After the period of acclimation, spat were  
110 sorted and divided into the experiment groups (shell length <5 mm). Groups of 10 selected spat  
111 were photographed on milli-graph paper (to obtain shell length – SL) and weighted to 0.0001 g (total  
112 live weight – LW). Each group of 10 individuals was successively placed into a 1.5 mm nylon mesh.  
113 Three groups of 10 spat constituted the experimental unit (N=30). Three further lots of spat were  
114 deployed in an open water environment (OUT) and used as a reference for the laboratory feeding  
115 trial.

116 The feeding trial lasted for 4 weeks, during which the spat were placed in 8l conical tanks, kept at 18  
117 °C in a static system with 20 µm filtered seawater and gentle aeration, under an 18:6 (L:D)  
118 photoperiod, with each diet treatment replicated in three independent tanks. The water was fully  
119 changed three times per week, coinciding with the feeding of the spat. PH (HI98190, Hanna  
120 instruments), salinity (hand refractometer), dissolved oxygen (Fibre optic oxygen transmitter,  
121 PreSens) and ammonia (Tetra test NH<sub>3</sub>/NH<sub>4</sub><sup>+</sup>) were monitored before every water change for the

122 entire feeding trial. Temperature loggers (Pendant, HoboWare) were used to monitor continuously  
123 the temperature profile.

124 Five diet treatments, chosen to have a varied PUFA composition, were evaluated during the trial,  
125 one of which included Shellfish Paste (SP – Instant Algae 1800, Reed Mariculture), which is a mixture  
126 of *Isochrysis* spp., *Pavlova* spp., *Tetraselmis* spp., *Chaetoceros calcitrans*, *Thalassiosira weissflogii*  
127 and *Thalassiosira pseudonana*. The remaining treatments included the administration of microalgae  
128 mono-diets of *Cylindrotheca fusiformis* (CYL – CCAP 1017/2), *Isochrysis galbana* (ISO - CCAP 927/1),  
129 *Monodopsis subterranean* (MONO – CCAP-848/1) and *Nannochloropsis oceanica* (NANNO – CCAP  
130 849/10). All strains used in this study were provided by the Culture and Collection of Algae and  
131 Protozoans (CCAP, [www.ccap.ac.uk](http://www.ccap.ac.uk)). Diets were supplied with a weekly ration of 0.4 mg of diet dry  
132 weight for each mg of live weight of reared spat [24]. Every week the spat were weighted and their  
133 live weight used to calculate the amount of diet to be provided during the following week. The  
134 grazing regime was monitored via a turbidimeter (TN-100, Eutech) both before and after diet  
135 administration, as an indicator of active grazing (**S1 Fig**). At the end of the trial, both OUT and  
136 laboratory kept spat were left for 48 hrs to depurate in filtered seawater and then snap-frozen in  
137 liquid nitrogen and stored at -80°C for further analysis. Spat were then freeze-dried (Q18 LO plus,  
138 Christ) and ground to a fine powder in liquid nitrogen. Ash content was calculated following the  
139 combustion of powdered spat for 12 hrs at 450°C.

## 140 **2.2 Microalgae production and their fatty acid composition**

141 Microalgae were grown in sterile 2l Duran's fitted with aeration lids, tubing and filters kept at 21°C  
142 under a 16:8 L:D photoperiod. Media used to maintain each strain are reported in **Table 1**. To obtain  
143 the cell dry weight for each strain (needed to calculate the required weekly food ratio for the spat),  
144 12 aliquots of 1 ml were collected from each stock culture; 6 of them counted using a coulter-  
145 counter (Multisizer 3, Coulter Counter) and the remaining 6 freeze-dried to obtain the dry weight  
146 which was then reported to the number of cells contained. Weekly, microalgae were harvested via  
147 centrifugation at 13G (9000 rpm) for 20 mins 4°C using sterile 250 ml centrifuge tubes (VWR) and

148 concentrated in a 50 ml sterile tubes (VWR) which were kept at 4°C and used for feeding the spat. At  
149 every harvesting day, an aliquot (50 ml) from each strain was collected, spun down (14000 rpm 4°C  
150 10 min) and placed in 1.5 ml tube (Eppendorf). The tubes were snap-frozen, freeze-dried and kept at  
151 -80°C for lipid analysis.

152

153 **Table 1:** Summary of diets employed during the feeding trial. For the live algae treatments, media used in the culture of  
154 microalgae strains and relative CCAP codes are reported.

| Strain code | CCAP   | Species name                    | Media    | Diet code                    | Feeding code | group |
|-------------|--------|---------------------------------|----------|------------------------------|--------------|-------|
|             | N/A    | <i>Shellfish paste</i>          | N/A      | ShellPaste                   | SP           |       |
|             | 1017/2 | <i>Cylindrotheca fusiformis</i> | F/2 + Si | <i>C. fusiformis</i> 1017/2  | CYL          |       |
|             | 927/1  | <i>Isochrysis galbana</i>       | F/2      | <i>I. galbana</i> 927/1      | ISO          |       |
|             | 848/1  | <i>Monodopsis subterranean</i>  | 3N BBM+V | <i>M. subterranean</i> 848/1 | MONO         |       |
|             | 849/10 | <i>Nannochloropsis oceanica</i> | F/2      | <i>N. oceanica</i> 849/10    | NANNO        |       |

155

156 The relative (%FAME) and absolute ( $\mu\text{gFA mg}_{\text{DW}}^{-1}$ ) composition of the diets employed in the trial is  
157 reported in

158 **Table 2.** Total saturated FA (SAFA) was highest in *C. fusiformis* and *I. galbana* ( $p < 0.05$ ), while the  
159 highest amount of monounsaturated FA (MUFA) was observed in *N. oceanica*. *C. fusiformis* resulted  
160 in the richest diet for n-6 PUFA ( $p < 0.001$ ) whilst no evident differences between diets were found for  
161 total n-3 and total PUFA content ( $p > 0.05$ ). ANOSIM (R 0.92  $p < 0.001$ ) evidenced the presence of  
162 multivariate differences between the various diet. *I. galbana* was characterised by a high content of  
163 22C FA as 22:4n-6, 22:5n-3 and DHA ( $p < 0.001$ ), while lacked EPA and AA. Further relevant FA in *I.*  
164 *galbana* resulted 14:0, 18C FA as 18:1n-9, 18:2n-6, 18:3n-3 and 20:1n-11. On the contrary *C.*  
165 *fusiformis* and *N. oceanica*, respectively resulted rich in AA ( $p < 0.001$ ) and EPA (more abundant in *N.*  
166 *oceanica*,  $p < 0.01$ ) and the MUFA 16:1n-7, which accounted for the 20% of total FA in both strains.  
167 *M. subterranean* was characterised by the richness of C18 FA as 18:2n-6, 18:3n-6 and 18:3n-3  
168 ( $p < 0.001$ ). *N. oceanica* and *C. fusiformis* were poor sources of 18:4n-3, which accounted for the 5%  
169 of total FA in all the other diets ( $p < 0.001$ ). ShellPaste, as a mixture of different microalgae strains,  
170 resulted in a balanced composition of main essential PUFA as EPA (16.1%) and DHA (6.17%), while  
171 lacked in AA (0.46%).

172



173 **Table 2:** Fatty acids composition of the five diets employed in this study, reported as percentage of each FAME for the total fatty acid content for each diet (% total FA) and as absolute fame  
 174 content µg of FA per mg of algae dry weight (µgFA mg<sub>dw</sub><sup>-1</sup>). AA: arachidonic acid – 20:4n-6, EPA: eicosapentaenoic acid – 20:5n-3, DHA: docosahexaenoic acid – 22:6n-3; DMA:  
 175 dimethylacetals. Data are reported as average of three replicates ± SD. Statistical differences are reported in comparison to ShellPaste. FA evidenced by SIMPER and differing significantly  
 176 between diets are in **bold**. Letters correspond to statistical significance: a p>0.05, b p<0.05, c p<0.01, d p<0.001 (†).

| FA Class | <i>C. fusiformis</i> CCAP<br>1017/2 |                                     | <i>I. galbana</i> CCAP<br>927/1 |                                     | <i>M. subterranean</i><br>CCAP 848/1 |                                     | <i>N. oceanica</i> CCAP<br>849/10 |                                     | ShellPaste               |                                     |
|----------|-------------------------------------|-------------------------------------|---------------------------------|-------------------------------------|--------------------------------------|-------------------------------------|-----------------------------------|-------------------------------------|--------------------------|-------------------------------------|
|          | % total FA                          | µgFA mg <sub>dw</sub> <sup>-1</sup> | % total FA                      | µgFA mg <sub>dw</sub> <sup>-1</sup> | % total FA                           | µgFA mg <sub>dw</sub> <sup>-1</sup> | % total FA                        | µgFA mg <sub>dw</sub> <sup>-1</sup> | % total FA               | µgFA mg <sub>dw</sub> <sup>-1</sup> |
| 14:0     | 6.75 <sup>a</sup> ±0.54             | 6.73 <sup>a</sup> ±0.66             | 18.57 <sup>d</sup> ±0.30        | 16.47 <sup>d</sup> ±2.12            | 0.26 <sup>d</sup> ±0.01              | 0.26 <sup>d</sup> ±0.02             | 4.12 <sup>c</sup> ±1.22           | 4.04 <sup>a</sup> ±1.85             | 6.62 <sup>a</sup> ±0.79  | 4.89 <sup>a</sup> ±1.48             |
| 15:0     | 0.47 <sup>a</sup> ±0.02             | 0.47 <sup>a</sup> ±0.08             | 0.26 <sup>b</sup> ±0.02         | 0.23 <sup>a</sup> ±0.01             | 0.49 <sup>a</sup> ±0.22              | 0.48 <sup>a</sup> ±0.20             | 0.31 <sup>b</sup> ±0.05           | 0.30 <sup>a</sup> ±0.09             | 0.62 <sup>a</sup> ±0.09  | 0.46 <sup>a</sup> ±0.13             |
| 16:0     | 18.50 <sup>a</sup> ±2.07            | 18.43 <sup>a</sup> ±2.54            | 10.15 <sup>a</sup> ±0.11        | 8.99 <sup>a</sup> ±0.98             | 19.31 <sup>a</sup> ±0.99             | 19.06 <sup>a</sup> ±1.33            | 18.68 <sup>a</sup> ±6.74          | 18.33 <sup>a</sup> ±9.51            | 13.77 <sup>a</sup> ±1.38 | 10.16 <sup>a</sup> ±2.73            |
| 18:0     | 0.33 <sup>a</sup> ±0.05             | 0.33 <sup>a</sup> ±0.08             | 0.49 <sup>a</sup> ±0.16         | 0.44 <sup>a</sup> ±0.20             | 0.23 <sup>c</sup> ±0.04              | 0.23 <sup>a</sup> ±0.02             | 0.59 <sup>a</sup> ±0.28           | 0.58 <sup>a</sup> ±0.34             | 0.73 <sup>a</sup> ±0.11  | 0.54 <sup>a</sup> ±0.17             |
| 16:1n-9  | 4.04 <sup>b</sup> ±0.89             | 4.11 <sup>a</sup> ±1.36             | 2.93 <sup>c</sup> ±0.10         | 2.60 <sup>b</sup> ±0.36             | 10.67 <sup>a</sup> ±0.45             | 10.53 <sup>c</sup> ±0.50            | 4.97 <sup>a</sup> ±1.72           | 4.61 <sup>a</sup> ±1.47             | 7.31 <sup>a</sup> ±0.89  | 5.30 <sup>a</sup> ±0.89             |
| 16:1n-7  | 19.61 <sup>d</sup> ±1.58            | 19.55 <sup>d</sup> ±2.37            | 2.14 <sup>d</sup> ±0.24         | 1.89 <sup>c</sup> ±0.21             | 2.31 <sup>d</sup> ±0.28              | 2.27 <sup>c</sup> ±0.12             | 22.03 <sup>d</sup> ±1.07          | 20.86 <sup>d</sup> ±3.55            | 10.95 <sup>a</sup> ±1.23 | 8.05 <sup>a</sup> ±2.02             |
| 18:1n-9  | 3.24 <sup>a</sup> ±1.82             | 3.07 <sup>a</sup> ±1.18             | 11.34 <sup>b</sup> ±0.23        | 10.06 <sup>a</sup> ±1.34            | 1.30 <sup>b</sup> ±0.18              | 1.27 <sup>b</sup> ±0.08             | 4.51 <sup>a</sup> ±2.72           | 4.40 <sup>a</sup> ±3.23             | 6.03 <sup>a</sup> ±1.37  | 4.41 <sup>a</sup> ±1.35             |
| 18:1n-7  | 0.94 <sup>a</sup> ±0.45             | 0.96 <sup>a</sup> ±0.53             | 2.37 <sup>b</sup> ±0.56         | 2.09 <sup>b</sup> ±0.46             | 4.47 <sup>d</sup> ±0.72              | 4.46 <sup>d</sup> ±1.10             | 0.50 <sup>a</sup> ±0.09           | 0.47 <sup>a</sup> ±0.06             | 1.23 <sup>a</sup> ±0.03  | 0.89 <sup>a</sup> ±0.15             |
| 20:1n-11 | 0.41 <sup>a</sup> ±0.67             | 0.46 <sup>a</sup> ±0.74             | 9.22 <sup>d</sup> ±1.02         | 8.22 <sup>d</sup> ±1.78             | 0.02 <sup>b</sup> ±0.03              | 0.02 <sup>a</sup> ±0.04             | 0.02 <sup>b</sup> ±0.04           | 0.02 <sup>a</sup> ±0.03             | 0.86 <sup>a</sup> ±0.40  | 0.61 <sup>a</sup> ±0.23             |
| 20:1n-9  | 0.88 <sup>a</sup> ±1.30             | 0.97 <sup>a</sup> ±1.44             | 0.00 <sup>a</sup> ±0.00         | 0.00 <sup>a</sup> ±0.00             | 0.13 <sup>a</sup> ±0.17              | 0.14 <sup>a</sup> ±0.19             | 0.16 <sup>a</sup> ±0.21           | 0.13 <sup>a</sup> ±0.15             | 0.30 <sup>a</sup> ±0.04  | 0.22 <sup>a</sup> ±0.01             |
| 20:1n-7  | 0.03 <sup>a</sup> ±0.03             | 0.04 <sup>a</sup> ±0.03             | 0.00 <sup>a</sup> ±0.00         | 0.00 <sup>a</sup> ±0.00             | 0.00 <sup>a</sup> ±0.00              | 0.00 <sup>a</sup> ±0.00             | 0.06 <sup>a</sup> ±0.05           | 0.05 <sup>c</sup> ±0.05             | 0.07 <sup>a</sup> ±0.01  | 0.05 <sup>a</sup> ±0.01             |
| 22:1n-11 | 0.08 <sup>a</sup> ±0.14             | 0.08 <sup>a</sup> ±0.15             | 0.00 <sup>a</sup> ±0.00         | 0.00 <sup>a</sup> ±0.00             | 0.15 <sup>a</sup> ±0.17              | 0.15 <sup>a</sup> ±0.18             | 0.19 <sup>a</sup> ±0.24           | 0.16 <sup>a</sup> ±0.18             | 0.21 <sup>a</sup> ±0.14  | 0.15 <sup>a</sup> ±0.09             |
| 22:1n-9  | 0.00 <sup>d</sup> ±0.00             | 0.00 <sup>c</sup> ±0.00             | 0.08 <sup>a</sup> ±0.02         | 0.08 <sup>a</sup> ±0.03             | 0.00 <sup>d</sup> ±0.00              | 0.00 <sup>c</sup> ±0.00             | 0.02 <sup>c</sup> ±0.03           | 0.01 <sup>c</sup> ±0.02             | 0.16 <sup>a</sup> ±0.05  | 0.11 <sup>a</sup> ±0.03             |
| 18:2n-6  | 1.58 <sup>b</sup> ±0.61             | 1.53 <sup>a</sup> ±0.32             | 5.27 <sup>b</sup> ±0.21         | 4.66 <sup>c</sup> ±0.42             | 4.63 <sup>a</sup> ±0.51              | 4.54 <sup>a</sup> ±0.14             | 2.31 <sup>a</sup> ±0.24           | 2.17 <sup>a</sup> ±0.19             | 3.43 <sup>a</sup> ±0.83  | 2.49 <sup>a</sup> ±0.63             |
| 18:3n-6  | 2.64 <sup>d</sup> ±0.36             | 2.61 <sup>c</sup> ±0.07             | 0.13 <sup>a</sup> ±0.06         | 0.11 <sup>a</sup> ±0.04             | 4.69 <sup>d</sup> ±0.15              | 4.64 <sup>d</sup> ±0.47             | 0.09 <sup>a</sup> ±0.03           | 0.08 <sup>a</sup> ±0.02             | 0.07 <sup>a</sup> ±0.04  | 0.05 <sup>a</sup> ±0.03             |
| 20:2n-6  | 0.00 <sup>a</sup> ±0.00             | 0.00 <sup>b</sup> ±0.00             | 0.14 <sup>a</sup> ±0.01         | 0.12 <sup>a</sup> ±0.02             | 0.00 <sup>d</sup> ±0.00              | 0.00 <sup>a</sup> ±0.00             | 0.10 <sup>a</sup> ±0.04           | 0.10 <sup>a</sup> ±0.05             | 0.11 <sup>a</sup> ±0.02  | 0.08 <sup>a</sup> ±0.01             |
| 20:3n-6  | 1.08 <sup>d</sup> ±0.40             | 1.04 <sup>c</sup> ±0.20             | 0.10 <sup>a</sup> ±0.01         | 0.09 <sup>a</sup> ±0.02             | 0.00 <sup>a</sup> ±0.00              | 0.00 <sup>a</sup> ±0.00             | 0.45 <sup>c</sup> ±0.07           | 0.43 <sup>b</sup> ±0.11             | 0.04 <sup>a</sup> ±0.04  | 0.03 <sup>a</sup> ±0.03             |
| AA       | 9.05 <sup>d</sup> ±0.44             | 9.11 <sup>b</sup> ±1.66             | 0.10 <sup>c</sup> ±0.02         | 0.09 <sup>a</sup> ±0.02             | 0.00 <sup>d</sup> ±0.00              | 0.00 <sup>a</sup> ±0.00             | 5.20 <sup>d</sup> ±0.36           | 4.90 <sup>b</sup> ±0.57             | 0.46 <sup>a</sup> ±0.03  | 0.34 <sup>a</sup> ±0.07             |
| 22:4n-6  | 0.00 <sup>a</sup> ±0.00             | 0.00 <sup>a</sup> ±0.00             | 0.25 <sup>d</sup> ±0.01         | 0.22 <sup>b</sup> ±0.01             | 0.00 <sup>a</sup> ±0.00              | 0.00 <sup>a</sup> ±0.00             | 0.00 <sup>a</sup> ±0.00           | 0.00 <sup>a</sup> ±0.00             | 0.02 <sup>a</sup> ±0.04  | 0.01 <sup>a</sup> ±0.02             |
| 22:5n-6  | 0.42 <sup>a</sup> ±0.08             | 0.42 <sup>a</sup> ±0.06             | 1.75 <sup>a</sup> ±1.59         | 1.51 <sup>a</sup> ±1.32             | 0.00 <sup>a</sup> ±0.00              | 0.00 <sup>a</sup> ±0.00             | 0.04 <sup>a</sup> ±0.04           | 0.04 <sup>b</sup> ±0.04             | 2.77 <sup>a</sup> ±0.59  | 2.02 <sup>a</sup> ±0.57             |
| 18:3n-3  | 0.15 <sup>d</sup> ±0.10             | 0.16 <sup>d</sup> ±0.12             | 7.19 <sup>b</sup> ±0.37         | 6.37 <sup>b</sup> ±0.74             | 26.63 <sup>d</sup> ±1.02             | 26.28 <sup>d</sup> ±1.42            | 0.11 <sup>d</sup> ±0.04           | 0.10 <sup>d</sup> ±0.03             | 4.48 <sup>a</sup> ±1.44  | 3.23 <sup>a</sup> ±0.99             |
| 18:4n-3  | 0.98 <sup>b</sup> ±0.33             | 0.95 <sup>a</sup> ±0.16             | 9.86 <sup>a</sup> ±0.49         | 8.71 <sup>a</sup> ±0.66             | 2.99 <sup>a</sup> ±2.54              | 3.03 <sup>a</sup> ±2.67             | 0.05 <sup>d</sup> ±0.04           | 0.04 <sup>c</sup> ±0.04             | 7.50 <sup>a</sup> ±1.86  | 5.39 <sup>a</sup> ±1.12             |
| 20:4n-3  | 0.61 <sup>a</sup> ±0.38             | 0.57 <sup>a</sup> ±0.26             | 0.00 <sup>c</sup> ±0.00         | 0.00 <sup>c</sup> ±0.00             | 0.00 <sup>c</sup> ±0.00              | 0.00 <sup>c</sup> ±0.00             | 0.10 <sup>a</sup> ±0.03           | 0.09 <sup>a</sup> ±0.02             | 0.27 <sup>a</sup> ±0.03  | 0.20 <sup>a</sup> ±0.05             |
| EPA      | 17.05 <sup>a</sup> ±2.74            | 17.34 <sup>a</sup> ±4.91            | 0.78 <sup>d</sup> ±0.17         | 0.70 <sup>d</sup> ±0.23             | 0.04 <sup>d</sup> ±0.07              | 0.04 <sup>d</sup> ±0.07             | 32.79 <sup>c</sup> ±7.57          | 30.67 <sup>d</sup> ±6.77            | 16.17 <sup>a</sup> ±0.75 | 11.86 <sup>a</sup> ±2.73            |
| 22:5n-3  | 0.14 <sup>a</sup> ±0.03             | 0.14 <sup>a</sup> ±0.02             | 1.01 <sup>a</sup> ±1.60         | 0.90 <sup>d</sup> ±1.43             | 0.00 <sup>a</sup> ±0.00              | 0.00 <sup>a</sup> ±0.00             | 0.00 <sup>a</sup> ±0.00           | 0.00 <sup>a</sup> ±0.00             | 0.10 <sup>a</sup> ±0.02  | 0.07 <sup>a</sup> ±0.02             |
| DHA      | 0.79 <sup>d</sup> ±0.09             | 0.80 <sup>d</sup> ±0.19             | 12.69 <sup>d</sup> ±0.28        | 11.27 <sup>d</sup> ±1.57            | 0.05 <sup>d</sup> ±0.08              | 0.05 <sup>d</sup> ±0.09             | 0.00 <sup>d</sup> ±0.00           | 0.00 <sup>d</sup> ±0.00             | 6.17 <sup>a</sup> ±1.63  | 4.47 <sup>a</sup> ±1.25             |
| 16:2     | 1.31 <sup>c</sup> ±0.28             | 1.33 <sup>a</sup> ±0.44             | 1.75 <sup>a</sup> ±0.22         | 1.57 <sup>a</sup> ±0.37             | 0.73 <sup>d</sup> ±0.06              | 0.72 <sup>a</sup> ±0.07             | 0.35 <sup>d</sup> ±0.20           | 0.32 <sup>b</sup> ±0.19             | 2.51 <sup>a</sup> ±0.24  | 1.85 <sup>a</sup> ±0.45             |
| 16:3     | 6.65 <sup>d</sup> ±1.40             | 6.79 <sup>d</sup> ±2.23             | 0.45 <sup>d</sup> ±0.33         | 0.38 <sup>b</sup> ±0.25             | 1.74 <sup>a</sup> ±0.16              | 1.72 <sup>a</sup> ±0.19             | 0.40 <sup>d</sup> ±0.15           | 0.37 <sup>b</sup> ±0.07             | 2.57 <sup>a</sup> ±0.53  | 1.86 <sup>a</sup> ±0.41             |
| 16:4     | 0.70 <sup>a</sup> ±0.62             | 0.76 <sup>a</sup> ±0.67             | 0.15 <sup>a</sup> ±0.01         | 0.13 <sup>a</sup> ±0.02             | 10.53 <sup>a</sup> ±9.14             | 10.66 <sup>a</sup> ±9.42            | 0.08 <sup>a</sup> ±0.07           | 0.07 <sup>a</sup> ±0.07             | 1.91 <sup>a</sup> ±0.38  | 1.40 <sup>a</sup> ±0.36             |
| 16:0 DMA | 1.18 <sup>b</sup> ±0.24             | 1.20 <sup>a</sup> ±0.37             | 0.82 <sup>c</sup> ±0.02         | 0.72 <sup>b</sup> ±0.09             | 3.09 <sup>a</sup> ±0.01              | 3.05 <sup>c</sup> ±0.26             | 1.49 <sup>a</sup> ±0.55           | 0.00 <sup>a</sup> ±0.00             | 2.26 <sup>a</sup> ±0.33  | 1.65 <sup>a</sup> ±0.35             |
| Σ SFA    | 26.11 <sup>a</sup> ±2.10            | 26.02 <sup>b</sup> ±2.93            | 29.49 <sup>a</sup> ±0.37        | 26.16 <sup>b</sup> ±3.32            | 20.29 <sup>a</sup> ±0.88             | 20.02 <sup>a</sup> ±1.20            | 23.81 <sup>a</sup> ±8.18          | 23.34 <sup>a</sup> ±11.7            | 22.01 <sup>a</sup> ±1.82 | 16.24 <sup>a</sup> ±4.43            |
| Σ MUFA   | 29.24 <sup>a</sup> ±1.74            | 29.25 <sup>a</sup> ±4.18            | 28.08 <sup>a</sup> ±0.57        | 24.94 <sup>a</sup> ±3.44            | 19.06 <sup>d</sup> ±0.39             | 18.86 <sup>a</sup> ±1.85            | 32.47 <sup>c</sup> ±2.37          | 30.70 <sup>a</sup> ±5.15            | 27.12 <sup>a</sup> ±0.30 | 19.80 <sup>a</sup> ±3.69            |
| Σ n-6    | 14.77 <sup>a</sup> ±1.17            | 14.70 <sup>d</sup> ±1.24            | 7.74 <sup>a</sup> ±1.53         | 6.80 <sup>a</sup> ±1.15             | 9.31 <sup>b</sup> ±0.49              | 9.18 <sup>a</sup> ±0.35             | 8.19 <sup>a</sup> ±0.56           | 7.71 <sup>a</sup> ±0.88             | 6.91 <sup>a</sup> ±0.33  | 5.02 <sup>a</sup> ±0.77             |
| Σ n-3    | 19.72 <sup>a</sup> ±2.29            | 19.95 <sup>a</sup> ±4.81            | 31.53 <sup>a</sup> ±1.96        | 27.95 <sup>a</sup> ±3.66            | 29.70 <sup>a</sup> ±1.79             | 29.41 <sup>a</sup> ±3.61            | 33.21 <sup>a</sup> ±7.65          | 31.04 <sup>a</sup> ±6.77            | 34.70 <sup>a</sup> ±2.71 | 25.23 <sup>a</sup> ±4.36            |
| Σ PUFA   | 43.15 <sup>a</sup> ±3.91            | 43.53 <sup>a</sup> ±9.39            | 41.61 <sup>a</sup> ±0.84        | 36.84 <sup>a</sup> ±3.66            | 52.02 <sup>a</sup> ±10.7             | 51.70 <sup>a</sup> ±13.0            | 42.23 <sup>a</sup> ±8.42          | 39.51 <sup>a</sup> ±7.32            | 48.61 <sup>a</sup> ±1.90 | 35.36 <sup>a</sup> ±5.75            |

† equal letters indicate similar significance level: a: p>0.05; b: p<0.05; c: p<0.01; d: p<0.001.

178

## 179 **2.3 Biometrical analyses**

180 Spat growth performances (GR) was measured as shell length increase (SI) and live weight increase  
181 (WI). At the beginning and at the end of the trial, spat were photographed on milli-graph paper, and  
182 their SL was obtained by processing the images via ImageJ software ([www.imagej.nih.gov](http://www.imagej.nih.gov)). GR was  
183 calculated as  $\Delta$  between shell size at T28 and T0. For WI calculation, spat were blotted on tissue  
184 paper and weighted at 0.0001 g scale (Sartorius). The  $\Delta$  between the live-weight at the beginning of  
185 the trial and the end resulted in WI.

186

## 187 **2.4 Biochemical analyses**

### 188 **2.4.1 Lipid extraction**

189 The homogenization procedures changed according to the matrix. Microalgae and diet samples were  
190 resuspended in 200  $\mu$ l of milliQ water and disrupted via probe sonication for 1 minute, whilst  
191 aliquots ( $\approx$  10 mg) of powdered spat were homogenated in 200  $\mu$ l of milliQ water by pestling in ice  
192 for 1 minute. For all samples, lipid extraction was done according to Folch, Lees (54). The dried lipid  
193 extracts were weighted to the 0.00001 g (Sartorius) and resuspended in 0.5 ml of chloroform  
194 constituting the total lipid extract (TLE). The TLE was divided into 2 sub-aliquots. One aliquot (400 $\mu$ l)  
195 was dried down in nitrogen and stored at -80 °C for lipid class and lipidomics analysis. To the second  
196 aliquot (100  $\mu$ l) was added an internal standard (FA 17:0, Sigma + 0.001% of BHT, Cayman Chemical  
197 Company at the 10% of the total lipid mass) and processed for fatty acid methyl esters (FAME)  
198 analysis.

### 199 **2.4.2 Fatty acids analysis**

200 FAME from TLE of diets and spat were prepared by acid-catalysed transesterification according to  
201 AOCS (55). The FAME layer was evaporated under a gentle nitrogen stream (NVap, Organomation)  
202 and the FAME were resuspended in 500  $\mu$ l of iso-hexane, purified on silica SPE cartridges (Clean-up  
203 Cusil 156, UCT) preconditioned with 5 ml of iso-hexane, and eluted twice with 5 ml of a 95:5 iso-

204 hexane:diethyl ether solution. Purified FAME were dried in N-vap and resuspended to  $1 \text{ mg ml}^{-1}$   
205 according to the original lipid mass in iso-hexane (HPLC grade, Fisher).  
206 FAME were separated by gas chromatography using a ThermoFisher GC 8000 (ThermoScientific)  
207 equipped with a fused silica capillary column (ZBWax, 60m x 0.32 x 0.25 mm i.d.; Phenomenex) with  
208 hydrogen as a carrier gas and using on-column injection. The temperature gradient was from 50 to  
209  $150^{\circ}\text{C}$  at  $40^{\circ}\text{C min}^{-1}$  and then to  $195^{\circ}\text{C}$  at  $1.5^{\circ}\text{C min}^{-1}$  and finally to  $220^{\circ}\text{C}$  at  $2^{\circ}\text{C min}^{-1}$ . Individual  
210 methyl esters were identified by comparison to known standards (Marine Oil, Restek) and by  
211 reference to published data [56]. Data were collected and processed using the Chromcard for  
212 Windows (version 2.00) computer package (Thermoquest Italia S.p.A.). Results are reported as a  
213 relative percentage of FAME composition (%FAME) and as absolute quantification via the internal  
214 standard method ( $\mu\text{glipid mg}_{\text{DW}}^{-1}$  for microalgae and  $\mu\text{gFA mg}_{\text{ashfreeDW}}^{-1}$  in the case of spat).

### 215 **2.4.3 Lipid class analysis**

216 TLE from spat and diets were separated in their main lipid class via normal phase high-pressure  
217 liquid chromatography coupled with electron light scattering detector (NP-HPLC-ELSD). The  
218 separation was accomplished with an Infinity 1260 platform (Agilent Technologies) according to  
219 Graeve and Janssen (57) with minor modifications. The protocol was modified to enhance the  
220 separation of certain lipid classes relevant in marine invertebrates, as phosphonoethyl ceramides  
221 (CPE). TLE was separated on a monolithic silica column (Chromolith Si 100x4.6, Merck) equipped  
222 with the relative guard columns (Chromolith Si guard cartridges, Merck). The column was kept at 40  
223  $^{\circ}\text{C}$  and the solvent flow kept at  $1.4 \text{ ml min}^{-1}$ . The quaternary elution gradient is reported in **Table**  
224 **3Error! Reference source not found.** Acetone, Isooctane (tri-methyl pentane), Ethyl Acetate and  
225 Water were all HPLC grade and obtained from FisherBrand, HPLC grade isopropanol (IPA) was  
226 obtained from Chromanorm. Glacial Acetic Acid (GAA) and Triethylamine (TEA), both HPLC grade,  
227 were purchased from VWR.

228 **Table 3** Quaternary gradient used during NP-HPLC separation of spat TLE. Mob A: Isooctane:Ethyl Acetate (99.8:0.2); Mob B: Acetone:  
229 Ethyl Acetate (2:1) + 25 mM GAA; Mob C: IPA: Water (85:15) + 15mM GAA and 7.5 mM TEA; Mob D: Isopropanol.

| Ret. Time (min.) | Mobile phase |      |      |      |
|------------------|--------------|------|------|------|
|                  | A(%)         | B(%) | C(%) | D(%) |
| 0.0              | 100          | 0    | 0    | 0    |
| 0.1              | 100          | 0    | 0    | 0    |
| 1.5              | 100          | 0    | 0    | 0    |
| 1.6              | 97           | 3    | 0    | 0    |
| 6.0              | 94           | 6    | 0    | 0    |
| 8.0              | 50           | 50   | 15   | 0    |
| 8.1              | 46           | 39   | 24   | 0    |
| 14.0             | 43           | 30   | 24   | 0    |
| 14.1             | 43           | 30   | 60   | 0    |
| 18.0             | 40           | 0    | 60   | 0    |
| 23.0             | 40           | 0    | 0    | 0    |
| 23.1             | 0            | 100  | 0    | 0    |
| 25.0             | 0            | 100  | 0    | 0    |
| 25.1             | 0            | 0    | 0    | 100  |
| 27.0             | 0            | 0    | 0    | 100  |
| 30.0             | 100          | 0    | 0    | 0    |
| 32.0             | 100          | 0    | 0    | 0    |

230

231 Identification of principal lipid classes was achieved via an external standard method. Commercially  
232 available purified lipid fractions were used as lipid class standards. Squalene (terpenes - TER),  
233 Arachydid dodecanoate (wax ester – WE), Cholesterol (free sterols – ST), triglycerides (triolein – TG),  
234 diacylglycerols (DG), monoacylglycerols (MG), FA17:0 (free fatty acid – FFA), Ceramides lipid mix  
235 from bovine brain (Cer), Phosphatidic acid (PA), phosphatidyl ethanolamine from soybean (PE),  
236 Cardiolipin from bovine heart (CL), Phosphatidyl serine (PS) and phosphatidyl choline (PC),  
237 phosphatidyl inositols (PI), lyso-phosphatidyl choline from egg yolk (LysoPC) all obtained by Sigma,  
238 sphingosylphosphorylethanolamine (CPE) from Matreya. Stock solutions for each lipid were  
239 prepared at 2.5 mg ml<sup>-1</sup> in 2:1 chloroform:methanol (HPLC grade, Fisher). From the stock solution,  
240 working solution were diluted in Mob A. Calibration curves were calculated by sequential 10 µl  
241 injections of standard mix solutions (0.5-0.25-0.125-0.066-0.033-0.0165-0.008 µg µl<sup>-1</sup> of each lipid  
242 class). Identification of lipid classes was achieved by retention time match between unknown  
243 samples and the standard mix. Spat TLE were resuspended in a 4:0.06:0.04 (Mob  
244 A:chloroform:methanol) solution at a concentration of 1 mg ml<sup>-1</sup> of which 10 µl volume was injected.  
245 Chromatograms were inspected, integrated and calibration curves calculated via Chemstation  
246 software (Agilent Technologies). Results are reported as relative lipid class composition (%TLE) and  
247 in absolute values (µglipid mg<sub>ash free DW</sub><sup>-1</sup>).

248 **2.4.4 Untargeted lipidomics**

249 Untargeted lipidomics of spat was achieved via High-Resolution Mass spectrometry (HRMS). The  
250 platform used was a binary HPLC (Accela, ThermoFisher) coupled with an electron spray ionization  
251 (ESI) and orbitrap mass analyser (Exactive, ThermoFisher). The separation was done on a C18  
252 Hypersyl Gold 100x2.1 mm 1.9nm particle size (ThermoFisher) kept at 50 °C. The binary solvent  
253 system included a constant flow rate of 400  $\mu\text{l min}^{-1}$  with a gradient as described in **Table 4**. Water  
254 and Acetonitrile were HPLC grade and obtained from Fisher, IPA was LC-MS grade (Hypergrade  
255 LiChrosolv, Merck), while ammonium formate and formic acid were both LC-MS grade and obtained  
256 from Sigma Aldrich.

257 **Table 4:** Binary gradient used during LC-MS analysis of spat TLE. Mob A: Water + 10 mM Ammonium formate + 20 mM  
258 Formic acid; Mob B: IPA:ACN (9:1) + 10 mM ammonium formate + 20 mM formic acid.

| Ret. Time (min.) | Mobile phase |      |
|------------------|--------------|------|
|                  | A(%)         | B(%) |
| 0.0              | 65           | 35   |
| 0.5              | 65           | 35   |
| 4.0              | 35           | 65   |
| 19.0             | 0            | 100  |
| 21.0             | 0            | 100  |
| 21.1             | 65           | 35   |
| 27.0             | 65           | 35   |

259

260 The mass spectra were acquired in the  $m/z$  range 250-2000 both in positive ESI (POS) and in negative  
261 ESI (NEG) with a mass resolution power of 100,000 FWHM. The mass error was kept below 5 ppm by  
262 routinely calibrations on both polarities with a calibration solution (Pierce™ LTQ ESI calibration  
263 solutions, ThermoFisher). TLE from spat were resuspended in 3:1 methanol: chloroform at a  
264 concentration of 1  $\text{mg ml}^{-1}$  with 3  $\mu\text{l}$  injection volume. Chromatograms and mass spectra were  
265 inspected and integrated via Xcalibur software (ThermoFisher), data processing and analysis  
266 procedures are reported in the data analysis section. LC-MS profiles of spat extracts are reported in  
267 **S2 Fig**. Features were identified according to their precursor ion exact mass ( $MS'$ ) and reported as  
268 lipid class with the total number of carbons and double bonds (e.g. PC(36:5), for phosphatidyl  
269 choline with 36 carbons and 5 double bonds on the fatty acyl residues). Isobaric lipids separated in

270 reverse phase chromatography but evidencing same MS', are reported with different letters (e.g.  
271 PC(38:5)<sub>a</sub> PC(38:5)<sub>b</sub>).

## 272 **2.5 Data analysis**

### 273 **2.5.1 Biometrical, FAME and lipid class analyses**

274 Statistical analysis was compiled via R statistical software (version 3.5.1). Data are reported as mean  
275 ± standard deviation. Statistical differences were considered significant for p<0.05. Biometrical data  
276 were log-transformed to force homoscedasticity. If normality assumptions were met, a two-way  
277 analysis of variance (two-way ANOVA) and a Tukey HSD test were employed to evaluate differences  
278 between the different diet groups at each sampling point. If homoscedasticity, following data  
279 transformation, was not met a Kruskal-Wallis with a Dunn's test (R 'dunn.test' package) as *posthoc*  
280 test was used to evaluate the effects of diet treatments on the spat.

281 Lipid class and FAME data were square-root transformed and multivariate differences were  
282 evaluated via Analysis of Similarities (ANOSIM). Non-Metric Multidimensional Scaling (nMDS) with  
283 Euclidean distance matrix was employed to graphically plot each sample group. Similarity  
284 percentages (SIMPER) were applied to evaluate the main lipid and fatty acids characteristic for each  
285 groups clustering. ANOSIM, nMDS and Simper analysis were obtained from R 'vegan' package [58].  
286 Lipid class and fame composition differences between groups were evaluated via a one-way ANOVA  
287 and Tukey HSD (false discovery rate – FDR – adjusted p-value [59]) as *posthoc* test, whilst Kruskal-  
288 Wallis with a Dunn's test as *a posteriori* comparison was employed on features that failed normality  
289 assumptions (tested via a Cochran test).

### 290 **2.5.2 Untargeted Lipidomics**

291 Raw LC-MS data were processed via Progenesis QI software (Nonlinear Dynamics, Waters). A  
292 technical QC sample was run every 6 hours of instrument operation time to monitor possible  
293 technical shift in the machine. Chromatograms were automatically aligned using a QC as a reference  
294 point. Peak picking and deconvolution were completed following automatic settings of the software,  
295 with intensity threshold of 1x10<sup>5</sup> and 1x10<sup>4</sup> respectively for POS and NEG ionization modes. Data were

296 normalised according to the total ion current of each chromatogram. Main lipid adducts for both  
297 POS and NEG were experimentally evaluated by using a lipid standard mixture that included the  
298 main lipid classes and were added to the software search (**S1 Table**). Lipid identification was  
299 achieved by searching the lipid dataset versus LIPID MAPS ([www.lipidmaps.org](http://www.lipidmaps.org)), HMDB  
300 ([www.hmdb.ca](http://www.hmdb.ca)), Metlin ([www.metlin.scripps.edu](http://www.metlin.scripps.edu)) and an “in house” bivalve lipid database built  
301 from recent bivalve lipidomics studies [60-69]. Contaminants were manually removed from the peak  
302 intensity table (PIT) generated from this process.

303 The PIT was furtherly filtered and processed with the R based package ‘MetaboAnalystR’ [70].  
304 Filtering process included the removal of features with over 30% of missing values and substitution  
305 of remaining missing values with a small value (half of the minimum intensity value). Features with  
306 low repeatability or low constant values were filtered out using QC samples and inter-quantile  
307 range, data was then scaled via Pareto scaling, to reduce the skewness of data and enhance  
308 comparability between different samples. Chemometrics analysis was employed as data reduction  
309 and biomarker discovery tools. Principal component analysis (PCA) was used to evaluate data  
310 quality, clustering between QC samples and the presence of outliers (**S2 Fig**). Partial least squares  
311 discriminant analysis (PLS-DA) was applied to cluster samples and to calculate variables of  
312 importance in projection (VIP) scores, which represent the weighted sum of squares of the PLS  
313 loadings taking into account the amount of explained Y-variation [71]. PLS-DA model fitting was  
314 evaluated via a permutation test and ten-fold leave one out cross-validation (LOOCV, **S3-S6 Fig**). The  
315 statistical significance of the features with VIP scores >1 was furtherly screened via a Kruskal-Wallis  
316 test with FDR adjusted p-value [59].

### 317 **2.5.3 Identification of main lipids linked with growth spat performances**

318 The correlation between spat growth performances (in term of WI) and spat lipid composition  
319 (considering the significant lipids evidenced from multivariate analysis of FAME, lipid class and  
320 lipidomics dataset) was calculated by means of Spearman rank correlation coefficient. Absolute

321 values for lipid class and FAME data and relative intensity for lipidomics data were used to compute  
322 the correlation.

323 **3 Results**

324 The diets employed in this study were selected due to their distinct FA profile (



325 **Table 2).** *I. galbana* presented DHA as main essential PUFA ( $12.69 \pm 0.24\%$  /  $11.27 \pm 1.57 \mu\text{gFA mg}_{\text{DW}}^{-1}$ ).  
326 AA and EPA were the most abundant PUFA in *C. fusiformis* and *N. oceanica*, with AA resulting higher  
327 in *C. fusiformis* than *N. oceanica* (respectively  $9.05 \pm 0.44\%$  /  $9.11 \pm 1.66 \mu\text{gFA mg}_{\text{DW}}^{-1}$  and  $5.20 \pm 0.56\%$   
328 /  $4.90 \pm 0.57 \mu\text{gFA mg}_{\text{DW}}^{-1}$ ) and with EPA showing the opposite trend (respectively  $17.05 \pm 2.74\%$  /  
329  $17.34 \pm 4.91 \mu\text{gFA mg}_{\text{DW}}^{-1}$  and  $32.79 \pm 7.57\%$  /  $30.67 \pm 6.77 \mu\text{gFA mg}_{\text{DW}}^{-1}$ ). On the other hand, *M.*  
330 *subterranean* lacked in C20 PUFA and was characterised by large amounts of 18:3n-3 ( $26.63 \pm 1.02\%$  /  
331  $26.28 \pm 1.42 \mu\text{gFA mg}_{\text{DW}}^{-1}$ ). We included ShellPaste on the experimental design to have a diet,  
332 composed by more than one microalgae strains, which supplied EPA and DHA (respectively  
333  $16.17 \pm 0.75\%$  /  $11.86 \pm 2.73 \mu\text{gFA mg}_{\text{DW}}^{-1}$  and  $6.17 \pm 1.63\%$  /  $4.47 \pm 1.25 \mu\text{gFA mg}_{\text{DW}}^{-1}$ ).  
334 At the end of the feeding trial period, we observed that the spat GR significantly varied across the  
335 sample groups (**Figure 1**). After 4 weeks of deployment at sea, OUT resulted the group with the  
336 longest shells (shell length – SL,  $4.86 \pm 0.68$  mm) and highest live weight (LW,  $75.08 \pm 14.2 \text{ mg}_{\text{LW}}$  spat  
337 <sup>1</sup>). Although smaller than OUT, also spat fed with *I. galbana* (ISO), *N. oceanica* (NANNO), *C.*  
338 *fusiformis* (CYL) and shellPaste (SP) resulted in bigger shells compared with the beginning of the trial  
339 ( $p < 0.001$ , **Figure 1A**), whereas spat fed with *M. subterranean* (MONO) did not present any significant  
340 increase in their shell length. LW significantly increased in ISO, CYL and SP treatments (Although SP  
341 LW resulted lower than the other groups, **Figure 1C**). Nevertheless, if GR is considered (SI and WI,  
342 **Figure 1B-D**) ISO and OUT outperformed the remaining sample groups ( $p < 0.01$ ).

**Figure 1: Growth rate (GR) and live weight increase (WI) on different spat groups.** A: variation of shell length in mm between in each group between the beginning of the trial (T0) and end of the experiment (T28). B: Size increase of the spat (reported in mm) during the diet trial when subjected to different diets. C: live weight per spat (reported in mg) between the beginning of the trial (T0) and the end of the trial (T28). D: weight increase per spat throughout the trial according to the different sample groups (reported in mg). SP: Shellfish Paste, CYL; *C. fusiformis* 1017/2, ISO: *I. galbana* 927/1, MONO: *M. subterranean* 848/1, NANNO: *N. oceanica* 849/10, OUT: Outdoor. Data are reported as average  $\pm$  SD. For figure A and C N=30 individual spat; for figures B and D N=3. Letters indicate significance levels: **a: p>0.05; b: p<0.05; c: p<0.01; d p<0.001;**

344 The investigation continued with the evaluation of the effects on the lipidome of the spat, beginning  
345 from traditional lipid analysis techniques as FA and lipid classes profiling. The data, expressed as  
346 relative composition (%) and absolute value ( $\mu\text{g mg}_{\text{ashfreeDW}}^{-1}$ ) of FA and/or lipid classes, are reported  
347 in **Table 5**. ANOSIM analysis suggested the presence of strong differences both for FA and lipid class  
348 between sample groups (R 0.935  $p < 0.001$  for FA and R 0.744  $p < 0.001$  for lipid class). During the  
349 feeding trial, the absolute amount of saturated fatty acids (SFA) and mono unsaturated fatty acids  
350 (MUFA) resulted low in poor performing groups (MONO and SP). Laboratory-reared spat (SP, CYL,  
351 ISO, MONO and NANNO) resulted richer their relative total n-6 PUFA compared with wild spat (T0  
352 and OUT,  $p < 0.001$ ), with the highest absolute content observed in CYL and ISO ( $p < 0.05$ ). The relative  
353 content of n-3 PUFA significantly decreased in CYL, MONO, NANNO and SP ( $p < 0.001$ ), while was  
354 significantly higher in OUT ( $p < 0.01$ ) when compared with T0. The percentage of total PUFA resulted  
355 significantly higher in OUT and ISO while it was significantly lower than T0 in MONO and NANNO  
356 ( $p < 0.01$ ). The absolute content of these last two parameters decreased significantly in MONO and SP  
357 compared with T0 ( $p < 0.05$ ).

358

359

360 **Table 5:** Fatty acids and lipid class composition of the spat subjected to the diet treatments, reported as % of each FAME for the total fatty acid (or of the total lipid extract – TLE) and absolute  
 361 content ( $\mu\text{gFA mg}_{\text{ashfreeDW}}^{-1}$  or  $\mu\text{glipid mg}_{\text{ashfreeDW}}^{-1}$  spat) for each diet group. FAME acronyms: AA: arachidonic acid – 20:4n-6, EPA: eicosapentaenoic acid – 20:5n-3, DHA: docosahexaenoic acid  
 362 – 22:6n-3; NMID: non-methylene interrupted dienoic fatty acids. Lipid class acronyms: WE: wax esters, TG: triacylglycerols, ST: free sterols, DG: diacylglycerols, FFA: free fatty acids, PE:  
 363 phosphatidylethanolamines, CPE: ceramide phosphoethanolamines, PI: phosphatidylinositol, PS: phosphatidylserine, PC: phosphatidylcholine, LysoPC: lysophosphatidylcholine. Unidentified  
 364 lipid classes are reported with Unkn and their retention time span (e.g. Unkn<sub>12.05</sub>). TO: Spat sampled before the beginning of the trial, SP: spat fed with Shellfish Paste; CYL: spat fed with *C.*  
 365 *fusiformis* 1017/2; ISO: spat fed with *I. galbana* 927/1; MONO: spat fed with *M. subterranean* 848/1; NANNO: spat fed with *N. oceanica* 849/10; OUT: spat deployed outdoor and sampled  
 366 after 4 weeks. Data are reported as a average of three replicates  $\pm$  SD. Statistical significance is reported in comparison with TO. FA and lipid class evidenced by SIMPER and differing  
 367 significantly between sample groups are in marked in **bold**. Letters correspond to statistical significance: a  $p > 0.05$ , b  $p < 0.05$ , c  $p < 0.01$ , d  $p < 0.001$  (†).

| FA Class | TO                                  |                                            | CYL                                 |                                            | ISO                                 |                                            | MONO                                |                                            | NANNO                               |                                            | OUT                                 |                                            | SP                                  |                                            |
|----------|-------------------------------------|--------------------------------------------|-------------------------------------|--------------------------------------------|-------------------------------------|--------------------------------------------|-------------------------------------|--------------------------------------------|-------------------------------------|--------------------------------------------|-------------------------------------|--------------------------------------------|-------------------------------------|--------------------------------------------|
|          | % Total FA                          | $\mu\text{gFA mg}_{\text{ashfreeDW}}^{-1}$ | % Total FA                          | $\mu\text{gFA mg}_{\text{ashfreeDW}}^{-1}$ | % Total FA                          | $\mu\text{gFA mg}_{\text{ashfreeDW}}^{-1}$ | % Total FA                          | $\mu\text{gFA mg}_{\text{ashfreeDW}}^{-1}$ | % Total FA                          | $\mu\text{gFA mg}_{\text{ashfreeDW}}^{-1}$ | % Total FA                          | $\mu\text{gFA mg}_{\text{ashfreeDW}}^{-1}$ | % Total FA                          | $\mu\text{gFA mg}_{\text{ashfreeDW}}^{-1}$ |
| 14:0     | <b>3.21<sup>a</sup></b> $\pm 0.36$  | <b>1.23<sup>a</sup></b> $\pm 0.23$         | <b>3.13<sup>a</sup></b> $\pm 0.18$  | <b>1.49<sup>a</sup></b> $\pm 0.56$         | <b>6.70<sup>d</sup></b> $\pm 0.80$  | <b>3.78<sup>d</sup></b> $\pm 0.74$         | <b>1.92<sup>d</sup></b> $\pm 0.27$  | <b>0.29<sup>c</sup></b> $\pm 0.13$         | <b>1.93<sup>c</sup></b> $\pm 0.20$  | <b>0.79<sup>a</sup></b> $\pm 0.17$         | <b>3.23<sup>a</sup></b> $\pm 0.21$  | <b>1.79<sup>a</sup></b> $\pm 0.16$         | <b>1.54<sup>d</sup></b> $\pm 0.06$  | <b>0.20<sup>d</sup></b> $\pm 0.03$         |
| 15:0     | 0.67 <sup>a</sup> $\pm 0.14$        | 0.25 <sup>a</sup> $\pm 0.03$               | 0.67 <sup>a</sup> $\pm 0.09$        | 0.31 <sup>a</sup> $\pm 0.06$               | 0.46 <sup>a</sup> $\pm 0.02$        | 0.27 <sup>a</sup> $\pm 0.09$               | 1.06 <sup>c</sup> $\pm 0.12$        | 0.17 <sup>a</sup> $\pm 0.08$               | 0.45 <sup>a</sup> $\pm 0.05$        | 0.18 <sup>a</sup> $\pm 0.03$               | 0.49 <sup>a</sup> $\pm 0.05$        | 0.27 <sup>a</sup> $\pm 0.03$               | 1.12 <sup>d</sup> $\pm 0.13$        | 0.14 <sup>a</sup> $\pm 0.02$               |
| 16:0     | <b>16.49<sup>a</sup></b> $\pm 1.22$ | <b>6.27<sup>a</sup></b> $\pm 0.83$         | <b>16.75<sup>a</sup></b> $\pm 0.70$ | <b>7.86<sup>a</sup></b> $\pm 2.38$         | <b>11.80<sup>d</sup></b> $\pm 0.15$ | <b>6.76<sup>a</sup></b> $\pm 1.81$         | <b>18.30<sup>a</sup></b> $\pm 2.01$ | <b>2.91<sup>a</sup></b> $\pm 1.46$         | <b>20.56<sup>c</sup></b> $\pm 0.15$ | <b>8.47<sup>a</sup></b> $\pm 1.92$         | <b>17.68<sup>a</sup></b> $\pm 0.57$ | <b>9.71<sup>a</sup></b> $\pm 0.77$         | <b>16.52<sup>a</sup></b> $\pm 0.83$ | <b>2.14<sup>b</sup></b> $\pm 0.30$         |
| 18:0     | 5.44 <sup>a</sup> $\pm 0.39$        | 2.07 <sup>a</sup> $\pm 0.33$               | 4.24 <sup>a</sup> $\pm 1.02$        | 1.98 <sup>a</sup> $\pm 0.66$               | 1.80 <sup>a</sup> $\pm 0.15$        | 1.04 <sup>a</sup> $\pm 0.35$               | 8.90 <sup>a</sup> $\pm 1.36$        | 1.43 <sup>a</sup> $\pm 0.75$               | 2.83 <sup>a</sup> $\pm 0.25$        | 1.17 <sup>a</sup> $\pm 0.28$               | 3.48 <sup>a</sup> $\pm 0.55$        | 1.86 <sup>a</sup> $\pm 0.10$               | 5.25 <sup>a</sup> $\pm 4.56$        | 0.63 <sup>a</sup> $\pm 0.55$               |
| 20:0     | 0.24 <sup>a</sup> $\pm 0.10$        | 0.09 <sup>a</sup> $\pm 0.04$               | 0.16 <sup>a</sup> $\pm 0.10$        | 0.07 <sup>a</sup> $\pm 0.05$               | 0.16 <sup>a</sup> $\pm 0.04$        | 0.09 <sup>a</sup> $\pm 0.05$               | 0.72 <sup>a</sup> $\pm 0.44$        | 0.13 <sup>a</sup> $\pm 0.09$               | 0.16 <sup>a</sup> $\pm 0.06$        | 0.07 <sup>a</sup> $\pm 0.04$               | 0.12 <sup>a</sup> $\pm 0.02$        | 0.07 <sup>a</sup> $\pm 0.00$               | 0.95 <sup>a</sup> $\pm 0.61$        | 0.12 <sup>a</sup> $\pm 0.07$               |
| 22:0     | 0.07 <sup>a</sup> $\pm 0.12$        | 0.03 <sup>a</sup> $\pm 0.05$               | 0.02 <sup>a</sup> $\pm 0.04$        | 0.01 <sup>a</sup> $\pm 0.02$               | 0.06 <sup>a</sup> $\pm 0.01$        | 0.03 <sup>a</sup> $\pm 0.01$               | 0.04 <sup>a</sup> $\pm 0.07$        | 0.00 <sup>a</sup> $\pm 0.01$               | 0.06 <sup>a</sup> $\pm 0.05$        | 0.02 <sup>a</sup> $\pm 0.02$               | 0.04 <sup>a</sup> $\pm 0.04$        | 0.02 <sup>a</sup> $\pm 0.00$               | 0.00 <sup>a</sup> $\pm 0.00$        | 0.00 <sup>a</sup> $\pm 0.00$               |
| 24:0     | 0.00 <sup>a</sup> $\pm 0.00$        | 0.00 <sup>a</sup> $\pm 0.00$               | 0.08 <sup>a</sup> $\pm 0.07$        | 0.04 <sup>a</sup> $\pm 0.04$               | 0.07 <sup>a</sup> $\pm 0.01$        | 0.04 <sup>a</sup> $\pm 0.01$               | 0.05 <sup>a</sup> $\pm 0.08$        | 0.00 <sup>a</sup> $\pm 0.01$               | 0.02 <sup>a</sup> $\pm 0.04$        | 0.01 <sup>a</sup> $\pm 0.01$               | 0.04 <sup>a</sup> $\pm 0.07$        | 0.01 <sup>a</sup> $\pm 0.01$               | 0.28 <sup>a</sup> $\pm 0.49$        | 0.04 <sup>a</sup> $\pm 0.06$               |
| 16:1n-9  | <b>0.92<sup>a</sup></b> $\pm 0.43$  | <b>0.35<sup>a</sup></b> $\pm 0.19$         | <b>0.97<sup>a</sup></b> $\pm 0.19$  | <b>0.46<sup>a</sup></b> $\pm 0.15$         | <b>0.56<sup>a</sup></b> $\pm 0.14$  | <b>0.32<sup>a</sup></b> $\pm 0.10$         | <b>2.06<sup>b</sup></b> $\pm 0.16$  | <b>0.31<sup>a</sup></b> $\pm 0.12$         | <b>0.74<sup>a</sup></b> $\pm 0.16$  | <b>0.30<sup>a</sup></b> $\pm 0.09$         | <b>0.69<sup>a</sup></b> $\pm 0.02$  | <b>0.38<sup>a</sup></b> $\pm 0.03$         | <b>1.57<sup>a</sup></b> $\pm 0.01$  | <b>0.20<sup>b</sup></b> $\pm 0.03$         |
| 16:1n-7  | <b>7.12<sup>a</sup></b> $\pm 0.39$  | <b>2.71<sup>a</sup></b> $\pm 0.40$         | <b>14.42<sup>a</sup></b> $\pm 0.80$ | <b>6.86<sup>b</sup></b> $\pm 2.61$         | <b>3.04<sup>a</sup></b> $\pm 0.12$  | <b>1.75<sup>a</sup></b> $\pm 0.53$         | <b>2.65<sup>b</sup></b> $\pm 0.26$  | <b>0.40<sup>c</sup></b> $\pm 0.16$         | <b>14.68<sup>a</sup></b> $\pm 1.14$ | <b>6.12<sup>b</sup></b> $\pm 1.80$         | <b>6.60<sup>a</sup></b> $\pm 0.40$  | <b>3.67<sup>a</sup></b> $\pm 0.33$         | <b>3.48<sup>a</sup></b> $\pm 1.16$  | <b>0.46<sup>b</sup></b> $\pm 0.21$         |
| 18:1n-9  | <b>5.68<sup>a</sup></b> $\pm 2.80$  | <b>2.14<sup>a</sup></b> $\pm 1.09$         | <b>3.00<sup>a</sup></b> $\pm 0.26$  | <b>1.43<sup>a</sup></b> $\pm 0.59$         | <b>10.70<sup>a</sup></b> $\pm 0.54$ | <b>6.10<sup>c</sup></b> $\pm 1.52$         | <b>4.40<sup>a</sup></b> $\pm 1.24$  | <b>0.63<sup>a</sup></b> $\pm 0.16$         | <b>12.06<sup>b</sup></b> $\pm 0.42$ | <b>4.96<sup>b</sup></b> $\pm 1.10$         | <b>4.90<sup>a</sup></b> $\pm 0.19$  | <b>2.68<sup>a</sup></b> $\pm 0.21$         | <b>5.07<sup>a</sup></b> $\pm 0.81$  | <b>0.67<sup>a</sup></b> $\pm 0.19$         |
| 18:1n-7  | <b>2.56<sup>a</sup></b> $\pm 0.10$  | <b>0.97<sup>a</sup></b> $\pm 0.11$         | <b>3.46<sup>b</sup></b> $\pm 0.45$  | <b>1.60<sup>a</sup></b> $\pm 0.39$         | <b>2.99<sup>a</sup></b> $\pm 0.05$  | <b>1.72<sup>a</sup></b> $\pm 0.50$         | <b>2.38<sup>a</sup></b> $\pm 0.34$  | <b>0.35<sup>b</sup></b> $\pm 0.12$         | <b>2.85<sup>a</sup></b> $\pm 0.21$  | <b>1.19<sup>a</sup></b> $\pm 0.34$         | <b>2.47<sup>a</sup></b> $\pm 0.05$  | <b>1.36<sup>a</sup></b> $\pm 0.11$         | <b>4.31<sup>d</sup></b> $\pm 0.53$  | <b>0.56<sup>a</sup></b> $\pm 0.11$         |
| 20:1n-11 | 1.17 <sup>a</sup> $\pm 0.11$        | 0.44 <sup>a</sup> $\pm 0.07$               | 0.70 <sup>d</sup> $\pm 0.08$        | 0.33 <sup>a</sup> $\pm 0.08$               | 0.74 <sup>d</sup> $\pm 0.06$        | 0.43 <sup>a</sup> $\pm 0.14$               | 2.25 <sup>d</sup> $\pm 0.21$        | 0.34 <sup>a</sup> $\pm 0.12$               | 0.54 <sup>d</sup> $\pm 0.07$        | 0.22 <sup>a</sup> $\pm 0.03$               | 1.09 <sup>a</sup> $\pm 0.05$        | 0.61 <sup>a</sup> $\pm 0.05$               | 1.86 <sup>d</sup> $\pm 0.11$        | 0.24 <sup>a</sup> $\pm 0.05$               |
| 20:1n-9  | <b>2.44<sup>a</sup></b> $\pm 0.38$  | <b>0.92<sup>a</sup></b> $\pm 0.12$         | <b>1.26<sup>a</sup></b> $\pm 0.88$  | <b>0.61<sup>a</sup></b> $\pm 0.49$         | <b>3.88<sup>b</sup></b> $\pm 0.18$  | <b>2.24<sup>a</sup></b> $\pm 0.70$         | <b>2.73<sup>a</sup></b> $\pm 0.59$  | <b>0.40<sup>a</sup></b> $\pm 0.10$         | <b>3.18<sup>a</sup></b> $\pm 0.13$  | <b>1.30<sup>a</sup></b> $\pm 0.25$         | <b>2.21<sup>a</sup></b> $\pm 0.04$  | <b>1.22<sup>a</sup></b> $\pm 0.10$         | <b>4.24<sup>b</sup></b> $\pm 0.44$  | <b>0.55<sup>a</sup></b> $\pm 0.13$         |
| 20:1n-7  | <b>0.56<sup>a</sup></b> $\pm 0.50$  | <b>0.20<sup>a</sup></b> $\pm 0.18$         | <b>0.99<sup>a</sup></b> $\pm 0.11$  | <b>0.47<sup>a</sup></b> $\pm 0.17$         | <b>0.51<sup>a</sup></b> $\pm 0.06$  | <b>0.30<sup>a</sup></b> $\pm 0.12$         | <b>1.12<sup>a</sup></b> $\pm 0.07$  | <b>0.17<sup>a</sup></b> $\pm 0.07$         | <b>0.39<sup>a</sup></b> $\pm 0.13$  | <b>0.17<sup>a</sup></b> $\pm 0.09$         | <b>0.59<sup>a</sup></b> $\pm 0.00$  | <b>0.33<sup>a</sup></b> $\pm 0.03$         | <b>1.54<sup>b</sup></b> $\pm 0.32$  | <b>0.20<sup>a</sup></b> $\pm 0.06$         |
| 22:1n-11 | 0.93 <sup>a</sup> $\pm 0.66$        | 0.34 <sup>a</sup> $\pm 0.25$               | 0.20 <sup>a</sup> $\pm 0.21$        | 0.11 <sup>a</sup> $\pm 0.14$               | 0.31 <sup>a</sup> $\pm 0.03$        | 0.18 <sup>a</sup> $\pm 0.07$               | 0.51 <sup>a</sup> $\pm 0.88$        | 0.04 <sup>a</sup> $\pm 0.08$               | 0.34 <sup>a</sup> $\pm 0.30$        | 0.13 <sup>a</sup> $\pm 0.11$               | 0.50 <sup>a</sup> $\pm 0.10$        | 0.27 <sup>a</sup> $\pm 0.01$               | 0.00 <sup>a</sup> $\pm 0.00$        | 0.00 <sup>a</sup> $\pm 0.00$               |
| 22:1n-9  | 0.15 <sup>a</sup> $\pm 0.14$        | 0.05 <sup>a</sup> $\pm 0.05$               | 0.10 <sup>a</sup> $\pm 0.09$        | 0.06 <sup>a</sup> $\pm 0.05$               | 0.09 <sup>a</sup> $\pm 0.01$        | 0.06 <sup>a</sup> $\pm 0.02$               | 0.09 <sup>a</sup> $\pm 0.16$        | 0.01 <sup>a</sup> $\pm 0.01$               | 0.06 <sup>a</sup> $\pm 0.05$        | 0.02 <sup>a</sup> $\pm 0.02$               | 0.10 <sup>a</sup> $\pm 0.09$        | 0.05 <sup>a</sup> $\pm 0.01$               | 0.16 <sup>a</sup> $\pm 0.14$        | 0.02 <sup>a</sup> $\pm 0.02$               |
| 24:1n-9  | 0.97 <sup>a</sup> $\pm 1.20$        | 0.38 <sup>a</sup> $\pm 0.49$               | 0.36 <sup>a</sup> $\pm 0.32$        | 0.20 <sup>a</sup> $\pm 0.19$               | 0.00 <sup>a</sup> $\pm 0.00$        | 0.00 <sup>a</sup> $\pm 0.00$               | 0.93 <sup>a</sup> $\pm 0.05$        | 0.15 <sup>a</sup> $\pm 0.07$               | 0.42 <sup>a</sup> $\pm 0.28$        | 0.17 <sup>a</sup> $\pm 0.13$               | 0.24 <sup>a</sup> $\pm 0.23$        | 0.11 <sup>a</sup> $\pm 0.02$               | 0.34 <sup>a</sup> $\pm 0.58$        | 0.04 <sup>a</sup> $\pm 0.07$               |
| 18:2n-6  | <b>2.52<sup>a</sup></b> $\pm 1.08$  | <b>0.94<sup>a</sup></b> $\pm 0.38$         | <b>1.55<sup>a</sup></b> $\pm 0.17$  | <b>0.74<sup>a</sup></b> $\pm 0.29$         | <b>4.90<sup>b</sup></b> $\pm 0.18$  | <b>2.83<sup>c</sup></b> $\pm 0.89$         | <b>1.61<sup>a</sup></b> $\pm 0.28$  | <b>0.24<sup>a</sup></b> $\pm 0.09$         | <b>2.48<sup>a</sup></b> $\pm 0.15$  | <b>1.02<sup>a</sup></b> $\pm 0.20$         | <b>4.37<sup>a</sup></b> $\pm 0.13$  | <b>2.43<sup>b</sup></b> $\pm 0.21$         | <b>2.50<sup>a</sup></b> $\pm 0.27$  | <b>0.33<sup>a</sup></b> $\pm 0.08$         |
| 18:3n-6  | 0.40 <sup>a</sup> $\pm 0.09$        | 0.15 <sup>a</sup> $\pm 0.05$               | 0.29 <sup>a</sup> $\pm 0.09$        | 0.14 <sup>a</sup> $\pm 0.07$               | 0.31 <sup>a</sup> $\pm 0.04$        | 0.18 <sup>a</sup> $\pm 0.08$               | 0.57 <sup>a</sup> $\pm 0.18$        | 0.09 <sup>a</sup> $\pm 0.05$               | 0.17 <sup>b</sup> $\pm 0.01$        | 0.07 <sup>a</sup> $\pm 0.01$               | 0.32 <sup>a</sup> $\pm 0.04$        | 0.17 <sup>a</sup> $\pm 0.01$               | 0.33 <sup>a</sup> $\pm 0.08$        | 0.04 <sup>a</sup> $\pm 0.01$               |
| 20:2n-6  | <b>0.49<sup>a</sup></b> $\pm 0.08$  | <b>0.19<sup>a</sup></b> $\pm 0.05$         | <b>0.24<sup>a</sup></b> $\pm 0.03$  | <b>0.11<sup>a</sup></b> $\pm 0.03$         | <b>1.35<sup>a</sup></b> $\pm 0.29$  | <b>0.79<sup>a</sup></b> $\pm 0.31$         | <b>0.19<sup>a</sup></b> $\pm 0.33$  | <b>0.02<sup>c</sup></b> $\pm 0.03$         | <b>0.23<sup>a</sup></b> $\pm 0.03$  | <b>0.10<sup>a</sup></b> $\pm 0.03$         | <b>0.80<sup>a</sup></b> $\pm 0.03$  | <b>0.44<sup>a</sup></b> $\pm 0.04$         | <b>0.55<sup>a</sup></b> $\pm 0.02$  | <b>0.07<sup>a</sup></b> $\pm 0.01$         |
| 20:3n-6  | 0.14 <sup>a</sup> $\pm 0.13$        | 0.05 <sup>a</sup> $\pm 0.05$               | 0.89 <sup>a</sup> $\pm 0.02$        | 0.42 <sup>a</sup> $\pm 0.14$               | 0.11 <sup>a</sup> $\pm 0.01$        | 0.07 <sup>a</sup> $\pm 0.03$               | 0.49 <sup>a</sup> $\pm 0.85$        | 0.04 <sup>a</sup> $\pm 0.07$               | 0.18 <sup>a</sup> $\pm 0.02$        | 0.07 <sup>a</sup> $\pm 0.02$               | 0.08 <sup>a</sup> $\pm 0.01$        | 0.05 <sup>a</sup> $\pm 0.00$               | 2.13 <sup>a</sup> $\pm 3.50$        | 0.28 <sup>a</sup> $\pm 0.45$               |
| AA       | <b>2.09<sup>a</sup></b> $\pm 0.35$  | <b>0.80<sup>a</sup></b> $\pm 0.18$         | <b>16.52<sup>b</sup></b> $\pm 0.99$ | <b>7.80<sup>d</sup></b> $\pm 2.54$         | <b>0.99<sup>a</sup></b> $\pm 0.15$  | <b>0.56<sup>a</sup></b> $\pm 0.11$         | <b>5.14<sup>a</sup></b> $\pm 0.23$  | <b>0.80<sup>a</sup></b> $\pm 0.33$         | <b>7.17<sup>a</sup></b> $\pm 0.21$  | <b>2.95<sup>b</sup></b> $\pm 0.68$         | <b>1.04<sup>a</sup></b> $\pm 0.02$  | <b>0.58<sup>a</sup></b> $\pm 0.05$         | <b>4.09<sup>a</sup></b> $\pm 3.56$  | <b>0.53<sup>a</sup></b> $\pm 0.48$         |
| 22:4n-6  | <b>0.09<sup>a</sup></b> $\pm 0.08$  | <b>0.03<sup>a</sup></b> $\pm 0.03$         | <b>1.55<sup>c</sup></b> $\pm 0.18$  | <b>0.74<sup>d</sup></b> $\pm 0.27$         | <b>0.27<sup>a</sup></b> $\pm 0.02$  | <b>0.16<sup>a</sup></b> $\pm 0.04$         | <b>0.31<sup>a</sup></b> $\pm 0.27$  | <b>0.04<sup>a</sup></b> $\pm 0.04$         | <b>0.41<sup>a</sup></b> $\pm 0.03$  | <b>0.17<sup>a</sup></b> $\pm 0.04$         | <b>0.03<sup>a</sup></b> $\pm 0.03$  | <b>0.02<sup>a</sup></b> $\pm 0.00$         | <b>0.58<sup>c</sup></b> $\pm 0.04$  | <b>0.08<sup>a</sup></b> $\pm 0.01$         |
| 22:5n-6  | <b>0.27<sup>a</sup></b> $\pm 0.02$  | <b>0.10<sup>a</sup></b> $\pm 0.01$         | <b>1.49<sup>a</sup></b> $\pm 0.03$  | <b>0.71<sup>d</sup></b> $\pm 0.24$         | <b>3.23<sup>b</sup></b> $\pm 0.16$  | <b>1.85<sup>d</sup></b> $\pm 0.52$         | <b>0.84<sup>a</sup></b> $\pm 0.07$  | <b>0.13<sup>a</sup></b> $\pm 0.04$         | <b>0.17<sup>a</sup></b> $\pm 0.04$  | <b>0.07<sup>a</sup></b> $\pm 0.02$         | <b>0.18<sup>a</sup></b> $\pm 0.01$  | <b>0.10<sup>a</sup></b> $\pm 0.01$         | <b>3.05<sup>b</sup></b> $\pm 0.45$  | <b>0.40<sup>b</sup></b> $\pm 0.11$         |
| 18:3n-3  | <b>1.59<sup>a</sup></b> $\pm 0.61$  | <b>0.60<sup>a</sup></b> $\pm 0.22$         | <b>0.46<sup>c</sup></b> $\pm 0.31$  | <b>0.21<sup>a</sup></b> $\pm 0.13$         | <b>11.99<sup>d</sup></b> $\pm 0.50$ | <b>6.91<sup>d</sup></b> $\pm 2.16$         | <b>0.93<sup>a</sup></b> $\pm 0.30$  | <b>0.15<sup>a</sup></b> $\pm 0.08$         | <b>0.25<sup>d</sup></b> $\pm 0.09$  | <b>0.10<sup>a</sup></b> $\pm 0.03$         | <b>5.13<sup>d</sup></b> $\pm 0.29$  | <b>2.86<sup>c</sup></b> $\pm 0.26$         | <b>0.94<sup>a</sup></b> $\pm 0.12$  | <b>0.12<sup>a</sup></b> $\pm 0.02$         |
| 18:4n-3  | <b>1.84<sup>a</sup></b> $\pm 0.08$  | <b>0.70<sup>a</sup></b> $\pm 0.10$         | <b>0.41<sup>b</sup></b> $\pm 0.11$  | <b>0.20<sup>a</sup></b> $\pm 0.08$         | <b>8.93<sup>a</sup></b> $\pm 0.92$  | <b>5.14<sup>d</sup></b> $\pm 1.57$         | <b>0.90<sup>a</sup></b> $\pm 0.29$  | <b>0.15<sup>a</sup></b> $\pm 0.09$         | <b>0.26<sup>c</sup></b> $\pm 0.05$  | <b>0.10<sup>a</sup></b> $\pm 0.03$         | <b>8.82<sup>a</sup></b> $\pm 0.89$  | <b>4.93<sup>d</sup></b> $\pm 0.49$         | <b>0.86<sup>a</sup></b> $\pm 0.25$  | <b>0.11<sup>a</sup></b> $\pm 0.02$         |
| 20:3n-3  | <b>0.00<sup>a</sup></b> $\pm 0.00$  | <b>0.00<sup>a</sup></b> $\pm 0.00$         | <b>0.00<sup>a</sup></b> $\pm 0.00$  | <b>0.00<sup>a</sup></b> $\pm 0.00$         | <b>0.39<sup>a</sup></b>             |                                            |                                     |                                            |                                     |                                            |                                     |                                            |                                     |                                            |

|               |                          |                          |                          |                          |                          |                          |                          |                         |                          |                          |                          |                          |                          |                         |
|---------------|--------------------------|--------------------------|--------------------------|--------------------------|--------------------------|--------------------------|--------------------------|-------------------------|--------------------------|--------------------------|--------------------------|--------------------------|--------------------------|-------------------------|
| $\Sigma$ SFA  | 26.13 <sup>a</sup> ±1.95 | 9.94 <sup>a</sup> ±1.41  | 25.04 <sup>a</sup> ±1.32 | 11.76 <sup>a</sup> ±3.59 | 21.05 <sup>b</sup> ±0.73 | 12.02 <sup>a</sup> ±3.01 | 30.98 <sup>a</sup> ±3.56 | 4.94 <sup>a</sup> ±2.48 | 26.02 <sup>a</sup> ±0.62 | 10.71 <sup>a</sup> ±2.38 | 25.09 <sup>a</sup> ±1.11 | 13.73 <sup>a</sup> ±3.79 | 25.64 <sup>a</sup> ±5.15 | 3.27 <sup>b</sup> ±0.38 |
| $\Sigma$ MUFA | 22.50 <sup>a</sup> ±2.20 | 8.52 <sup>a</sup> ±1.02  | 25.46 <sup>a</sup> ±1.96 | 12.11 <sup>a</sup> ±4.67 | 22.83 <sup>a</sup> ±0.31 | 13.09 <sup>a</sup> ±3.65 | 19.11 <sup>a</sup> ±3.60 | 2.81 <sup>b</sup> ±0.82 | 35.27 <sup>d</sup> ±0.77 | 14.58 <sup>a</sup> ±3.60 | 19.41 <sup>a</sup> ±0.28 | 10.67 <sup>a</sup> ±3.07 | 22.57 <sup>a</sup> ±2.88 | 2.95 <sup>b</sup> ±0.72 |
| $\Sigma$ n-6  | 6.00 <sup>a</sup> ±0.52  | 2.27 <sup>a</sup> ±0.14  | 22.53 <sup>d</sup> ±1.05 | 10.64 <sup>d</sup> ±3.54 | 11.17 <sup>a</sup> ±0.66 | 6.43 <sup>b</sup> ±1.95  | 9.16 <sup>c</sup> ±1.42  | 1.35 <sup>a</sup> ±0.39 | 10.80 <sup>d</sup> ±0.17 | 4.45 <sup>a</sup> ±0.99  | 6.82 <sup>a</sup> ±0.12  | 3.77 <sup>a</sup> ±1.18  | 13.24 <sup>d</sup> ±1.14 | 1.73 <sup>a</sup> ±0.37 |
| $\Sigma$ n-3  | 34.63 <sup>a</sup> ±2.43 | 13.16 <sup>a</sup> ±1.76 | 18.33 <sup>d</sup> ±1.01 | 8.77 <sup>a</sup> ±3.40  | 37.46 <sup>a</sup> ±1.24 | 21.52 <sup>a</sup> ±6.21 | 21.34 <sup>d</sup> ±0.18 | 3.30 <sup>c</sup> ±1.39 | 19.06 <sup>d</sup> ±0.37 | 7.87 <sup>a</sup> ±1.88  | 40.08 <sup>c</sup> ±1.35 | 22.23 <sup>a</sup> ±7.24 | 20.15 <sup>d</sup> ±0.57 | 2.62 <sup>c</sup> ±0.41 |
| $\Sigma$ PUFA | 46.26 <sup>a</sup> ±3.04 | 17.57 <sup>a</sup> ±2.24 | 46.36 <sup>a</sup> ±1.30 | 22.04 <sup>a</sup> ±7.95 | 51.68 <sup>a</sup> ±0.67 | 29.68 <sup>a</sup> ±8.47 | 40.21 <sup>c</sup> ±0.96 | 6.19 <sup>b</sup> ±2.49 | 34.09 <sup>d</sup> ±0.55 | 14.02 <sup>a</sup> ±3.05 | 51.17 <sup>b</sup> ±1.56 | 28.37 <sup>a</sup> ±9.18 | 41.89 <sup>a</sup> ±1.68 | 5.45 <sup>b</sup> ±0.93 |

| Lipid class           | T0                             |                                                         | CYL                            |                                                         | ISO                            |                                                         | MONO                           |                                                         | NANNO                          |                                                         | OUT                            |                                                         | SP                             |                                                         |
|-----------------------|--------------------------------|---------------------------------------------------------|--------------------------------|---------------------------------------------------------|--------------------------------|---------------------------------------------------------|--------------------------------|---------------------------------------------------------|--------------------------------|---------------------------------------------------------|--------------------------------|---------------------------------------------------------|--------------------------------|---------------------------------------------------------|
|                       | %TLE                           | $\frac{\mu\text{g}}{\text{mg}_{\text{ashfreeDW}}^{-1}}$ | %TLE                           | $\frac{\mu\text{g}}{\text{mg}_{\text{ashfreeDW}}^{-1}}$ | %TLE                           | $\frac{\mu\text{g}}{\text{mg}_{\text{ashfreeDW}}^{-1}}$ | %TLE                           | $\frac{\mu\text{g}}{\text{mg}_{\text{ashfreeDW}}^{-1}}$ | %TLE                           | $\frac{\mu\text{g}}{\text{mg}_{\text{ashfreeDW}}^{-1}}$ | %TLE                           | $\frac{\mu\text{g}}{\text{mg}_{\text{ashfreeDW}}^{-1}}$ | %TLE                           | $\frac{\mu\text{g}}{\text{mg}_{\text{ashfreeDW}}^{-1}}$ |
| TER                   | 5.35 <sup>a</sup> ±3.63        | 2.49 <sup>a</sup> ±1.17                                 | 0.91 <sup>a</sup> ±0.83        | 1.72 <sup>a</sup> ±1.53                                 | 0.53 <sup>b</sup> ±0.50        | 1.41 <sup>a</sup> ±1.30                                 | 11.07 <sup>a</sup> ±3.53       | 2.95 <sup>a</sup> ±1.09                                 | 3.33 <sup>a</sup> ±0.30        | 3.52 <sup>a</sup> ±1.08                                 | 3.30 <sup>a</sup> ±2.51        | 4.73 <sup>a</sup> ±2.46                                 | 22.74 <sup>a</sup> ±18.1       | 3.39 <sup>a</sup> ±2.41                                 |
| WE                    | 1.78 <sup>a</sup> ±3.08        | 0.18 <sup>a</sup> ±0.31                                 | 0.00 <sup>a</sup> ±0.00        | 0.00 <sup>a</sup> ±0.00                                 | 0.08 <sup>a</sup> ±0.14        | 0.00 <sup>a</sup> ±0.00                                 | 0.00 <sup>a</sup> ±0.00        | 0.00 <sup>a</sup> ±0.00                                 | 0.00 <sup>a</sup> ±0.00        | 0.00 <sup>a</sup> ±0.00                                 | 0.00 <sup>a</sup> ±0.00        | 0.00 <sup>a</sup> ±0.00                                 | 4.43 <sup>a</sup> ±7.67        | 0.49 <sup>a</sup> ±0.84                                 |
| 1.77                  | 0.13 <sup>a</sup> ±0.22        |                                                         | 0.00 <sup>a</sup> ±0.00        |                                                         | 0.00 <sup>a</sup> ±0.00        |                                                         | 0.52 <sup>b</sup> ±0.16        |                                                         | 0.00 <sup>a</sup> ±0.00        |                                                         | 0.00 <sup>a</sup> ±0.00        |                                                         | 0.35 <sup>a</sup> ±0.31        |                                                         |
| <b>TG</b>             | <b>34.74<sup>a</sup> ±5.03</b> | <b>4.23<sup>a</sup> ±0.82</b>                           | <b>76.95<sup>a</sup> ±6.18</b> | <b>32.9<sup>c</sup> ±10.1</b>                           | <b>90.00<sup>b</sup> ±3.25</b> | <b>51<sup>d</sup> ±15.3</b>                             | <b>3.16<sup>a</sup> ±0.82</b>  | <b>0.3<sup>a</sup> ±0.08</b>                            | <b>76.41<sup>a</sup> ±1.63</b> | <b>35.01<sup>c</sup> ±17.9</b>                          | <b>82.25<sup>b</sup> ±4.60</b> | <b>57.16<sup>d</sup> ±20.8</b>                          | <b>16.98<sup>a</sup> ±9.86</b> | <b>1.58<sup>a</sup> ±1.23</b>                           |
| 4.44                  | 0.56 <sup>a</sup> ±0.01        |                                                         | 0.45 <sup>a</sup> ±0.14        |                                                         | 0.19 <sup>a</sup> ±0.04        |                                                         | 0.87 <sup>a</sup> ±0.19        |                                                         | 0.48 <sup>a</sup> ±0.11        |                                                         | 0.67 <sup>a</sup> ±0.41        |                                                         | 1.42 <sup>b</sup> ±0.49        |                                                         |
| <b>ST</b>             | <b>4.71<sup>a</sup> ±0.85</b>  | <b>3.74<sup>a</sup> ±1.42</b>                           | <b>1.79<sup>a</sup> ±0.30</b>  | <b>3.9<sup>a</sup> ±0.62</b>                            | <b>0.38<sup>c</sup> ±0.15</b>  | <b>2.91<sup>a</sup> ±1.03</b>                           | <b>6.92<sup>a</sup> ±0.68</b>  | <b>3.55<sup>a</sup> ±1.03</b>                           | <b>2.12<sup>a</sup> ±0.50</b>  | <b>4.1<sup>a</sup> ±0.62</b>                            | <b>0.61<sup>b</sup> ±0.14</b>  | <b>3.74<sup>a</sup> ±0.61</b>                           | <b>5.39<sup>a</sup> ±2.14</b>  | <b>2.16<sup>a</sup> ±0.08</b>                           |
| DG                    | 0.88 <sup>a</sup> ±0.15        | 1.63 <sup>a</sup> ±0.61                                 | 0.89 <sup>a</sup> ±0.36        | 1.92 <sup>a</sup> ±0.30                                 | 0.74 <sup>a</sup> ±0.27        | 1.77 <sup>a</sup> ±0.64                                 | 0.54 <sup>a</sup> ±0.13        | 1.4 <sup>a</sup> ±0.56                                  | 0.53 <sup>a</sup> ±0.03        | 1.8 <sup>a</sup> ±0.31                                  | 0.44 <sup>a</sup> ±0.18        | 1.96 <sup>a</sup> ±0.43                                 | 0.60 <sup>a</sup> ±0.25        | 0.89 <sup>a</sup> ±0.03                                 |
| FFA                   | 1.29 <sup>a</sup> ±0.50        | 3.88 <sup>a</sup> ±1.73                                 | 0.26 <sup>a</sup> ±0.13        | 3.09 <sup>a</sup> ±0.56                                 | 0.25 <sup>a</sup> ±0.11        | 3.26 <sup>a</sup> ±0.90                                 | 0.56 ±0.18                     | 2.32 <sup>a</sup> ±0.88                                 | 0.25 <sup>a</sup> ±0.11        | 3.02 <sup>a</sup> ±0.43                                 | 0.25 <sup>a</sup> ±0.09        | 3.96 <sup>a</sup> ±0.38                                 | 0.65 <sup>a</sup> ±0.17        | 1.65 <sup>a</sup> ±0.17                                 |
| Unkn <sub>10.23</sub> | 0.25 <sup>a</sup> ±0.44        |                                                         | 0.28 <sup>a</sup> ±0.27        |                                                         | 0.05 <sup>a</sup> ±0.08        |                                                         | 1.78 <sup>a</sup> ±0.48        |                                                         | 0.14 <sup>a</sup> ±0.13        |                                                         | 0.00 <sup>a</sup> ±0.00        |                                                         | 0.56 <sup>a</sup> ±0.49        |                                                         |
| Unkn <sub>10.81</sub> | <b>0.41<sup>a</sup> ±0.71</b>  |                                                         | <b>0.78<sup>a</sup> ±0.23</b>  |                                                         | <b>0.55<sup>a</sup> ±0.33</b>  |                                                         | <b>3.02<sup>b</sup> ±1.22</b>  |                                                         | <b>0.38<sup>a</sup> ±0.52</b>  |                                                         | <b>0.06<sup>a</sup> ±0.11</b>  |                                                         | <b>0.78<sup>a</sup> ±0.27</b>  |                                                         |
| Unkn <sub>12.05</sub> | <b>0.00<sup>a</sup> ±0.00</b>  |                                                         | <b>0.00<sup>a</sup> ±0.00</b>  |                                                         | <b>0.00<sup>a</sup> ±0.00</b>  |                                                         | <b>3.40<sup>d</sup> ±1.22</b>  |                                                         | <b>0.00<sup>a</sup> ±0.00</b>  |                                                         | <b>0.00<sup>a</sup> ±0.00</b>  |                                                         | <b>0.17<sup>a</sup> ±0.29</b>  |                                                         |
| <b>PE</b>             | <b>13.28<sup>a</sup> ±5.92</b> | <b>9.06<sup>a</sup> ±2.99</b>                           | <b>5.24<sup>b</sup> ±2.37</b>  | <b>11.1<sup>a</sup> ±3.69</b>                           | <b>2.23<sup>c</sup> ±0.79</b>  | <b>7.2<sup>a</sup> ±1.48</b>                            | <b>27.13<sup>a</sup> ±4.12</b> | <b>13.49<sup>a</sup> ±0.12</b>                          | <b>5.18<sup>a</sup> ±0.70</b>  | <b>11.87<sup>a</sup> ±4.97</b>                          | <b>4.21<sup>b</sup> ±0.63</b>  | <b>14.18<sup>a</sup> ±5.27</b>                          | <b>16.53<sup>a</sup> ±4.24</b> | <b>6.66<sup>a</sup> ±0.69</b>                           |
| CPE                   | 0.51 <sup>a</sup> ±0.45        | 1.55 <sup>a</sup> ±1.38                                 | 0.43 <sup>a</sup> ±0.45        | 2.2 <sup>a</sup> ±0.25                                  | 0.07 <sup>a</sup> ±0.13        | 1.2 <sup>a</sup> ±1.18                                  | 0.70 <sup>a</sup> ±0.26        | 1.7 <sup>a</sup> ±0.69                                  | 0.14 <sup>a</sup> ±0.13        | 1.2 <sup>a</sup> ±1.06                                  | 0.05 <sup>a</sup> ±0.09        | 0.63 <sup>a</sup> ±1.08                                 | 0.32 <sup>a</sup> ±0.31        | 0.67 <sup>a</sup> ±0.58                                 |
| <b>PI</b>             | <b>8.41<sup>a</sup> ±0.98</b>  | <b>11.90<sup>a</sup> ±3.42</b>                          | <b>3.47<sup>c</sup> ±0.94</b>  | <b>14.77<sup>a</sup> ±3.82</b>                          | <b>0.93<sup>d</sup> ±0.32</b>  | <b>7.48<sup>a</sup> ±1.17</b>                           | <b>11.16<sup>a</sup> ±2.49</b> | <b>12.51<sup>a</sup> ±0.67</b>                          | <b>3.03<sup>c</sup> ±0.31</b>  | <b>13.94<sup>a</sup> ±4.09</b>                          | <b>2.14<sup>d</sup> ±0.34</b>  | <b>15.45<sup>a</sup> ±5.65</b>                          | <b>7.62<sup>a</sup> ±2.94</b>  | <b>6.74<sup>a</sup> ±0.33</b>                           |
| PS                    | 1.29 <sup>a</sup> ±0.62        | 3.12 <sup>a</sup> ±1.00                                 | 0.78 <sup>a</sup> ±0.59        | 4.45 <sup>a</sup> ±2.12                                 | 0.31 <sup>a</sup> ±0.09        | 2.87 <sup>a</sup> ±0.69                                 | 4.14 <sup>a</sup> ±2.2         | 4.86 <sup>a</sup> ±1.08                                 | 0.79 <sup>a</sup> ±0.28        | 4.33 <sup>a</sup> ±1.07                                 | 0.26 <sup>a</sup> ±0.14        | 2.49 <sup>a</sup> ±2.48                                 | 1.70 <sup>a</sup> ±1.40        | 2.13 <sup>a</sup> ±1.07                                 |
| <b>PC</b>             | <b>26.40<sup>a</sup> ±289</b>  | <b>13.73<sup>a</sup> ±0.24</b>                          | <b>7.58<sup>d</sup> ±2.29</b>  | <b>13.61<sup>a</sup> ±4.79</b>                          | <b>3.14<sup>d</sup> ±1.24</b>  | <b>7.69<sup>a</sup> ±1.23</b>                           | <b>25.03<sup>a</sup> ±1.38</b> | <b>11.59<sup>a</sup> ±1.42</b>                          | <b>7.23<sup>d</sup> ±0.19</b>  | <b>13.89<sup>a</sup> ±6.32</b>                          | <b>5.83<sup>d</sup> ±1.16</b>  | <b>16.86<sup>a</sup> ±6.72</b>                          | <b>19.76<sup>a</sup> ±5.63</b> | <b>6.88<sup>a</sup> ±0.81</b>                           |
| <b>LysoPC</b>         | <b>0.24<sup>a</sup> ±0.42</b>  | <b>0.19<sup>a</sup> ±0.33</b>                           | <b>0.36<sup>a</sup> ±0.24</b>  | <b>1.29<sup>a</sup> ±0.66</b>                           | <b>0.13<sup>a</sup> ±0.22</b>  | <b>0.65<sup>a</sup> ±1.13</b>                           | <b>4.68<sup>d</sup> ±1.84</b>  | <b>5.82<sup>c</sup> ±2.35</b>                           | <b>0.27<sup>a</sup> ±0.04</b>  | <b>1.17<sup>a</sup> ±2.97</b>                           | <b>0.23<sup>a</sup> ±0.04</b>  | <b>1.51<sup>a</sup> ±0.43</b>                           | <b>0.65<sup>a</sup> ±0.57</b>  | <b>0.66<sup>a</sup> ±0.79</b>                           |
| $\Sigma$ Polar lip.   | 49.94 <sup>a</sup> ±8.63       | 39.55 <sup>a</sup> ±11.1                                | 18.86 <sup>d</sup> ±5.60       | 47.41 <sup>a</sup> ±13.3                                | 7.87 <sup>d</sup> ±2.92        | 27.1 <sup>a</sup> ±3.84                                 | 79.77 <sup>b</sup> ±3.41       | 49.98 <sup>a</sup> ±3.80                                | 17.05 <sup>d</sup> ±0.86       | 46.40 <sup>a</sup> ±16.0                                | 12.57 <sup>d</sup> ±1.82       | 51.12 <sup>a</sup> ±19.0                                | 47.73 <sup>a</sup> ±13.9       | 23.6 <sup>a</sup> ±3.68                                 |
| $\Sigma$ Neutral lip. | 49.44 <sup>a</sup> ±8.58       | 16.18 <sup>a</sup> ±4.73                                | 81.25 <sup>a</sup> ±5.74       | 43.53 <sup>b</sup> ±12.7                                | 92.17 <sup>c</sup> ±3.01       | 60.32 <sup>c</sup> ±18.7                                | 23.63 <sup>a</sup> ±4.34       | 10.51 <sup>a</sup> ±3.64                                | 83.11 <sup>a</sup> ±1.03       | 47.45 <sup>b</sup> ±20.0                                | 87.53 <sup>b</sup> ±1.62       | 71.55 <sup>d</sup> ±23.8                                | 52.56 <sup>a</sup> ±13.9       | 10.16 <sup>a</sup> ±2.53                                |
| $\Sigma$ known        | 98.89 ±0.93                    |                                                         | 98.66 ±0.27                    |                                                         | 98.79 ±0.96                    |                                                         | 95.09 ±0.88                    |                                                         | 99.27 ±0.45                    |                                                         | 99.49 ±0.49                    |                                                         | 97.38 ±0.42                    |                                                         |
| $\Sigma$ unknow       | 1.35 ±0.82                     |                                                         | 1.69 ±0.50                     |                                                         | 1.34 ±0.82                     |                                                         | 9.59 ±2.54                     |                                                         | 1.00 ±0.45                     |                                                         | 0.74 ±0.53                     |                                                         | 3.28 ±0.25                     |                                                         |

† equal letters indicate similar significance level: a: p>0.05; b: p<0.05; c: p<0.01; d: p<0.001;

**Figure 2 Non-metric multidimensional scaling (nMDS) plot of the relative FAME composition of spat (%FAME) subjected to the feeding trial.** T0: Spat sampled before the beginning of the trial, SP: spat fed with Shellfish Paste during the 4 weeks trial; CYL: spat fed with *C. fusiformis* 1017/2 during the 4 weeks diet trial; ISO: spat fed with *I. galbana* 927/1 during the 4 weeks diet trial; MONO: spat fed with *M. subterranean* 848/1 during the 4 weeks trial; NANNO: spat fed with *N. oceanica* 849/10 during the 4 weeks trial; OUT: spat deployed outdoor and sampled after 4 weeks. Three replicates (n=3) for each sample group are here reported.

369

370 Further differences between treatment groups were analysed via nMDS and SIMPER. NMDS plot  
371 (stress=0.085) is reported in **Error! Reference source not found.** T0 clustered in the centre of the  
372 plot and from there three main clustering group of samples are observed. OUT and ISO closely  
373 clustered together, characterised by the content in 18:2n-6 (p<0.05), 18:3n-3 (P<0.01) and 18:4n-3  
374 (p<0.001), 20:3n-3 (p<0.001). ISO was also characterised by high amount of 14:0 (p<0.001), 18:1n-9  
375 (p<0.01), 20:1n-9 (p<0.05), of the PUFAs 20:2n-6 (p<0.05), 22:5n-6 (p<0.05) and 20:3n-3 (p<0.05)  
376 and FA20:2 non methylene interrupted dienoic (NMID, p<0.01). EPA was significantly lower in ISO  
377 than T0, CYL, NANNO and OUT (p<0.01). CYL and NANNO, clustered closely together on nMDS plot;  
378 these groups were characterised by the rich amount of 16:1n-7 (p<0.05), AA (p<0.05) and 22:4n-6  
379 (although only in CYL resulted different from T0, p<0.05) and low DHA content (p<0.01). CYL was also  
380 characterised by the presence of 22:4n-6 and 22:5n-6 (p<0.05), whilst higher levels of 18:1n-9 and  
381 the relative content of FA 20:2 NMID characterised NANNO (p<0.05). A reduction of FA 22:2 and  
382 22:3 NMID was also observed in CYL and ISO (p<0.05). SP and MONO closely clustered the nMDS plot  
383 as characterised by low EPA (p<0.01) and their high relative content of 16:4, 20:2 and 22:2 NMID  
384 (p<0.01). DHA content was significantly lower in SP compared with T0 (p<0.05).

385 The analysis of lipid class showed that the main lipid classes found in spat included terpenes (TER),  
386 wax esters (WE), triacylglycerols (TG), free sterols (ST), diacylglycerols (DG), free fatty acids (FFA),  
387 phosphatidylethanolamines (PE), phosphatidylinositols (PI), phosphatidylcholines (PC) and  
388 lysophosphatidylcholine (LysoPC). The nMDS analysis of spat lipid classes (**Figure 3**) evidenced the  
389 presence of three main groups of samples according to the diet provided (stress= 0.028). T0 and SP

390 contained similar relative amounts of neutral and polar lipids and occupied the central portion of the  
391 nMDS plot. A large % of neutral lipids in these samples were constituted by terpenes (varied  
392 between 5% to over 22% of TLE) and TG (16-30% of TLE). Due to the lower relative abundance of TG,  
393 higher relative amounts of polar lipids were observed in these groups (**Table 5**;  $p < 0.05$ ). Neutral  
394 lipids dominated the relative composition in ISO, OUT, CYL and NANNO, which clustered closely on  
395 the nMDS plot. In all these groups, the main lipid class was triacylglycerols (TG), which accounted for  
396 over 75% of TLE in these samples. The predominance of TG in the previous diet groups, consequently  
397 affected the relative quantification of the polar lipid classes, resulting in significant differences when  
398 compared with T0 ( $p < 0.05$ ). Lastly, MONO clustered isolated from the other samples, characterised  
399 by the lowest amount of TG, two unidentified lipids Unkn<sub>11.80</sub> ( $p < 0.05$ ) and Unkn<sub>12.05</sub> ( $p < 0.001$ ) and by  
400 the relative content in polar lipid ( $79.77 \pm 3.41\%$ ,  $p < 0.05$ ).

401 In absolute terms, TG resulted to be the main component of neutral lipids, and the only lipid class  
402 being affected by the diet treatments ( $p < 0.05$ ). The remaining neutral lipid classes were hardly  
403 affected by the diet treatments, as their absolute content remained stable between T0 and the spat  
404 diet groups ( $p > 0.05$ ). Indeed, the absolute content of polar lipids was also hardly affected by the  
405 different diets ( $p > 0.05$ ), with only LysoPC resulting significantly higher in MONO ( $p < 0.01$ ).

406

**Figure 3 Non-metric multidimensional scaling (nMDS) plot for relative lipid class composition of the spat (%TLE) subjected to the feeding trial.** T0: Spat sampled before the beginning of the trial; SP: spat fed with Shellfish Paste during the 4 weeks trial; CYL: spat fed with *C. fusiformis* 1017/2 during the 4 weeks diet trial; ISO: spat fed with *I. galbana* 927/1 during the 4 weeks diet trial; MONO: spat fed with *M. subterranean* 848/1 during the 4 weeks trial; NAN: spat fed with *N. oceanica* 849/10 during the 4 weeks trial; OUT: spat deployed outdoor and sampled after 4 weeks. Three replicates ( $n=3$ ) for each sample group are here reported.

407

408 The spat lipidome exploration was completed by untargeted lipidomics. The LC-MS analysis of spat  
409 lipidome subjected to the different diets resulted in the identification of 463 features (343 of them  
410 successfully identified according to exact mass) and 620 features (267 successfully identified

411 according to exact mass) respectively in positive (POS) and negative (NEG) ionization modes. For  
412 convenience, we will here focus on successfully identified lipid species. Plots obtained with the full  
413 dataset are available as Supplement material (**Figures S9-S12**). The LC-MS profiles and the PIT are  
414 provided in **S7 Figure** and **S1 Data**, whilst raw data are available from Mendeley data repository  
415 (DOI: 10.17632/w57zy87s68.1). POS and NEG data were separately analysed via PLS-DA, the  
416 resulting plots are shown in **Figure 4**. Similarly to what observed on FA and lipid class analysis, the  
417 different groups showed distinct lipid profiles which resulted in neat clustering of the samples. The  
418 score plots shown in **Figure 4** explained the 77.6% and 58.5% between components 1 and 2 of PLS-  
419 DA models respectively for NEG and POS dataset. Cross-validation of the PLS-DA model identified in  
420 the first 4 PLS components the best model accuracy for POS and in 5 PLS needed for NEG (**Figures**  
421 **S6-S8**). Therefore, to extract the most meaningful for the two models we considered the average of  
422 VIP scores for the first 4 PLS components (POS) and first 5 PLS in NEG data. Lipids resulting in an  
423 average VIP scores >1 (and significantly different between treatments) are reported in **Figure 5**.

**Figure 4: Partial least squares discriminant analysis (PLS-DA) plots of untargeted lipidomics data of the spat diet treatments groups.** Positive ionization mode (A) and Negative ionization mode (B). Plotted via MetaboAnalystR.

424

425 In **Figure 5A** are reported the VIP>1 evidenced by PLS-DA analysis of POS spat data. Lipids observed  
426 in POS mode included mainly PC, PE and neutral lipids as cholesteryl esters (CE), Cer and TG. The  
427 main separation between samples in POS mode was given by the presence of TG, resulting low in T0,  
428 MONO and SP (with the remaining two overlapping in POS PLSDA plot, see **Figure 4**). TG were  
429 abundant in the remaining groups. Unsaturated TG ( $n^{\circ}$  double bonds  $\geq 5$ ) were principally observed  
430 in ISO treatment, while highly unsaturated TG ( $n^{\circ}$  double bonds >11) resulted more abundant in CYL  
431 and ISO than in all other groups. Low unsaturated TG, as TG(48:2)a and TG(50:2), discriminated NAN  
432 from CYL, OUT and ISO diet groups. Further differences between CYL, NAN, OUT and ISO were  
433 observed in the abundance of the main PC species in each group (**Figure 5C**). PC(38:6) resulted in the

434 most abundant PC in ISO whereas PC(35:6) was the main PC in T0, NAN and OUT. On the contrary,  
435 PC(36:4), PC(38:4) and PC(38:5)a were principally contained in CYL diet group. PC plasmalogens,  
436 PC(O-38:6/P-38:5) and PC(O-36:5/P-36:4), characterised in OUT and in minority T0.

437

**Figure 5 Heatmap plots and intensity charts for the VIP>1 scores evidenced by PLS-DA analysis of spat untargeted lipidomics data in Positive (A) and Negative (B) ionization mode.** Euclidean distance was used as a distance measure, Ward as clustering algorithm. Lipids are reported as class, n<sup>o</sup> carbon and n<sup>o</sup> of double bonds (e.g. TG.58.10). Colour coding for lipid expression from Blue (Low) to red (High). (C) histogram plot showing the intensity of important lipids for PLSDA classification POS data. (D) histogram plot showing the intensity of important lipids for PLSDA classification NEG data. Square-rooted transformation of intensity was employed to plot the data. Data plotted via Daniel's XL toolbox for Microsoft Excel.

438

439 The heatmap plot reported in **Figure 5B** shows the patterns of the VIP features highlighted by PLS-  
440 DA analysis of NEG data. Polar lipid species as PE, ceramide phosphonoaminoethyl ethanolamines  
441 (CAEP), ceramide phosphonoethanolamines (CPE), PI, PS and CL are easily visualised in negative  
442 ionization mode. If compared with POS data, the patterns evidenced in NEG data are less defined  
443 (**Figure 5D**). Samples are principally clustered in two groups: one including NANNO and CYL, whilst  
444 the second one included the remaining sample groups. NANNO was characterised by high levels of  
445 PC(O-36:4), CAEP(34:1), CAEP(34:2)a and PI(40:5); PE(38:5)b, PE(P-36:4), PC(38:5)a-b, PC(38:4) and  
446 CAEP(34:2)b were highly abundant in CYL. From the other main cluster OUT was characterised by the  
447 presence of plasmalogens PC(PC(O-38:6) PC(P-38:5) and PC(O-36:5) PC(P-36:4); ISO from PC(38:6),  
448 PC(34:4), PE(P-40:5) and CAEP(34:3). MONO and SP differed for the presence of CL(88:24) in the  
449 former and CL(88:23) in the latter. T0 samples were characterised by the higher presence of PI(38:5)  
450 and PI(40:6) compared with the remaining groups. Few of the relevant compounds could not be  
451 identified via the database employed in this study, but as relevant for PLS-DA classification were  
452 kept and shown as unidentified features (see **S12 Figure** for details).

453 We also calculated the correlation coefficients between relevant lipids highlighted out of FA, lipid  
454 class and lipidomics with GR and WI. GR did not result in highly correlated lipids (Spearman R<sup>2</sup> <0.8)



455 so that is not discussed here (the complete correlation tables for GR and WI are provided in **S2**  
 456 **Data**). On the other hand, several lipids resulted correlated with WI (provided in **Table 6**). The data  
 457 suggest a positive correlation between accumulation of neutral lipid in spat and higher WI. TG ( $R^2 =$   
 458  $0.86$   $p < 0.05$ ) and especially for unsaturated TG species (nn<sup>o</sup> double bonds  $\geq 5$ ) resulted significantly  
 459 correlated with spat WI. Furthermore, also spat total content in n-3 PUFA ( $R^2 \geq 0.88$   $p < 0.05$ ), total  
 460 PUFA ( $R^2 \geq 0.87$   $p < 0.05$ ), 18:1n-7, 18:2n-6 and 20:2n-6 resulted significantly correlated with WI.

461 **Table 6 Spearman rank correlation coefficients of lipids highlighted from the dataset analysed in this study and spat live**  
 462 **weight increase (WI)**. The reported p-values are adjusted for multiple comparisons [59].

| Spearman rank correlation coefficient |                |                 |
|---------------------------------------|----------------|-----------------|
| Vs Live weight increase (WI)          |                |                 |
| Feature ID                            | R <sup>2</sup> | fdr adj P-value |
| TG(40:5)                              | 0.94           | 2.25E-05        |
| TG(54:9)                              | 0.93           | 4.60E-15        |
| TG(50:6)                              | 0.93           | 4.60E-15        |
| TG(58:8)                              | 0.92           | 4.60E-15        |
| TG(56:10)                             | 0.92           | 4.60E-15        |
| TG(58:11)                             | 0.91           | 4.60E-15        |
| TG(52:7)                              | 0.91           | 4.60E-15        |
| TG(56:5)                              | 0.91           | 4.60E-15        |
| TG(52:5)                              | 0.91           | 4.60E-15        |
| 20:2n-6                               | 0.90           | 4.60E-15        |
| 18:2n-6                               | 0.89           | 4.60E-15        |
| TG(56:7)                              | 0.88           | 4.60E-15        |
| Σ n-3                                 | 0.88           | 4.60E-15        |
| TG(54:5)                              | 0.88           | 4.60E-15        |
| Σ PUFA                                | 0.87           | 4.60E-15        |
| TG(58:10)                             | 0.86           | 4.60E-15        |
| TG                                    | 0.86           | 4.60E-15        |
| TG(56:9)                              | 0.84           | 4.60E-15        |
| TG(58:5)                              | 0.84           | 4.60E-15        |
| TG(52:6)                              | 0.82           | 1.30E-04        |
| TG(60:10)b                            | 0.81           | 2.15E-04        |
| Σ Neutral lip.                        | 0.80           | 3.05E-04        |
| 18:1n-7                               | 0.80           | 3.05E-04        |
| TG(60:14)                             | 0.80           | 3.54E-04        |

463

#### 464 **4 Discussion**

465 For the first time to our knowledge, traditional lipid profiling techniques (as FA profiling and lipid  
 466 class analysis) are here accompanied by untargeted lipidomics to approach bivalve physiology, in a  
 467 comprehensive lipid analysis strategy. A large amount of information has been obtained in the past  
 468 from FA analysis, however, as lipids are complex molecules with a large variety of structures and  
 469 roles, many yet not fully understood in marine invertebrates [72], a comprehensive investigation is  
 470 appropriate to reveal relevant information on marine invertebrate physiology [53]. The results of the  
 471 three analytical approaches considered in this study offered unequivocal evidences regarding the

472 effect of diets on mussel juveniles growth. From GR and WI analysis down to lipid molecular species,  
473 spat group could be easily classified between good performing (ISO, OUT), average performing (CYL,  
474 NANNO) and low performing (MONO, SP). The better were growth performances, the further away  
475 spat drifted from T0 samples.

#### 476 **4.1 Growth performances: who did grow, and who did not.**

477 Varying the microalgae composition of the diet has a profound effect on mussel spat growth  
478 performances [73]. OUT was the group characterised by the highest growth performances (SL  $4.86 \pm$   
479  $0.68$  mm and LW  $75.08 \pm 14.2$  mg<sub>LW</sub>spat<sup>-1</sup>) during 4 weeks of outdoor deployment (**Figure 1**).  
480 Commonly, juvenile mussels, experience the fastest growth during summer in temperate areas [22,  
481 74]. Typical summer phytoplankton communities in the Northeast Atlantic provide a variegated diet  
482 characterised by high abundance of diatoms and haptophytes, including high nutritional strains as  
483 *Chaetoceros sp.*, *Skeletonema sp.* and *Thalassiosira sp.*, which might favour mussel growth [75, 76].  
484 The variety of microalgae available on the water column to the spat was reflected on the FA  
485 composition of OUT, characterised by large quantity of 16:1n-7 and EPA (common markers of  
486 diatoms grazing), 18:4n-3 and DHA (markers of flagellates) and 18:2n-6 which is marker of plant and  
487 microalgae detritus [77].

488 Considering the results obtained from SI and WI, we could classify the tested diet groups based on  
489 observed GR as: “Fast growth” for ISO and OUT, which outperformed the remaining diet treatments  
490 in term of GR; “average growth” for CYL and NANNO, which showed significant increase in SL of spat  
491 during the feeding trial; and “Low growth” SP and MONO (no growth observed). ISO, CYL and  
492 NANNO were fed to microalgae strains rich in essential PUFA, DHA for *I. galbana* and AA/EPA for *C.*  
493 *fusiformis* and *N. oceanica* (**Table 2**). The observed trends agree with what was found in the past on  
494 different bivalve species, as providing either a source of DHA or EPA is known to be sufficient to  
495 meet spat nutritional requirements and obtain sustained growth [30, 32, 78]. Considering the FA  
496 composition of the diet provided, we can observe a preference for DHA rather than AA/EPA in  
497 mussel spat, as ISO resulted in significantly higher growth performances than the other two groups.

498 Similar observations were made in *T. philippinarum* fed with *I. galbana*, showing faster growth  
499 compared with clams fed *T. suecica*, an EPA rich strain [79, 80]. ShellPaste is a commercial  
500 alternative to live algae, which although balanced in the main essential PUFA, resulted in limited  
501 growth performances of the spat. Even lower were the growth performances in of MONO; a possible  
502 reason for this could be the dietary lack of long-chain PUFA, as also observed in similar case of  
503 bivalve juveniles subjected to diets lacking of essential PUFA [37, 78, 80, 81].

#### 504 **4.2 Fatty acid analysis: de novo synthesis of essential PUFA and accumulation of specific FA in fast** 505 **growing spat.**

506 After having evaluated the effect of the diets on spat growth, which largely varied between sample  
507 groups, we concentrated the efforts in studying the diet effect on spat lipid metabolism. FA  
508 composition analysis highlighted the importance of essential PUFA supply via the diet, as mussels'  
509 spat evidenced low capabilities for *de novo* synthesis of essential n-3 PUFA; EPA and DHA have  
510 important physiological and structural roles, whilst MUFA are often catabolised or stored in reserve  
511 lipids [29, 32]. Total PUFA and total n-3 PUFA content resulted correlated with spat WI (Spearman  
512  $R^2 > 0.8$   $p < 0.05$ , **Table 6**). Those two parameters were depleted in slow-growing diet groups (SP,  
513 MONO). Although a similar PUFA content was provided with diets, only in nutritionally efficient diet  
514 treatments (ISO, CYL, NANNO, OUT) these two parameters were not depleted. This could be related  
515 with the tendency in bivalves to anabolise essential PUFA and catabolise non-essential FA as MUFA.  
516 Nevertheless, in conditions that do not ensure sufficient nutritional resources via the diet, also  
517 essential PUFA are catabolised to produce energy resulting in a decreasing of n-3 PUFA and total  
518 PUFA content (as observed in MONO and SP).

519 DHA has a principal structural function in bivalves, as suggested from several authors in the past [29,  
520 31, 32, 80, 82-84]. The results obtained in this study show that DHA levels did not vary between the  
521 beginning of the trial and the diet groups ISO, MONO and OUT; whilst resulted lowered in CYL,  
522 NANNO and SP. This seems to be in accordance with what found by Caers, Coutteau (30), who  
523 observed that DHA content remained relatively stable in starved *or Dunaliella tertiolecta* (species

524 lacking essential PUFA) fed *Tapes philippinarum* spat; in the same study, DHA was instead  
525 accumulated in animals fed DHA enriched diets, whilst it decreased in spat fed EPA rich diets.

526 Likewise, in the present study availability of EPA (*C. fusiformis*, *N. oceanica* and ShellPaste) resulted  
527 in a significant reduction of DHA in the spat with sustained growth. A reduction of DHA content was  
528 also observed in *T. philippinarum*, *Ruditapes decussatus* and *Ostrea edulis* spat subjected to EPA rich  
529 diets lacking DHA [27, 30, 42]. Da Costa (48) analysed the fatty acid assimilation in *C. gigas* larvae,  
530 observing a certain degree of elongation of EPA to 22:5n-3 in the absence of DHA. Our data suggest  
531 a different response to DHA unavailability in mussel spat, as 22:5n-3 was low in all the sample  
532 groups. On the other hand, 22:4n-6 and 22:5n-6, observed only in traces at T0 and absent on the  
533 diets provided, were accumulated in CYL and (less) in NANNO, reaching respectively the 1.55%  
534 ( $0.74 \pm 0.27 \mu\text{gFA mg}_{\text{ashfreeDW}}^{-1}$ ) and 1.49% ( $0.71 \pm 0.24 \mu\text{gFA mg}_{\text{ashfreeDW}}^{-1}$ ) of TLE in CYL. Similar patterns  
535 were also observed in *O. edulis* spat subjected to an EPA and AA rich diet [42]. Elongation and *de*  
536 *novo* synthesis of n-3 and n-6 FA are largely dependent on the supply of shorter FA precursors, with  
537 a general rule a larger synthesis of n-3 PUFA in respect of n-6 PUFA [85]. In this case, the  
538 accumulation of AA, supplied by *C. fusiformis*, might have provided a substrate for elongation to  
539 22:4n-6 and desaturation to 22:5n-6 rather than the elongation of other n-3 PUFA to compensate for  
540 the lack in 22C PUFA (which was lacking from dietary inputs).

541 Non-methylene interrupted dienoic FA (NMID-FA) are endogenous FA characteristic of polar lipid in  
542 bivalves. Their exact role is not completely understood, however, they are found exclusively in the  
543 polar lipids and their content, in some cases, has been found to be inversely proportional to the  
544 essential PUFA supplied by the diet [86], whilst in other cases NMID FA were considered to be only  
545 partially influenced by dietary intakes [29, 80]. Our data agree with the first hypothesis, as NMID  
546 absolute abundance increased in ISO (20:2 NMID, diet lacking of 20C PUFA, with a significant  
547 decrease of 22:2 NMID), while the relative abundance of 20:2 and 22:2 NMID FA resulted  
548 significantly higher in SP and MONO.

549 18C and 20C PUFA and MUFA (18:1n-9, 18:2n-6, 20:2n-6, 18:3n-3 and 18:4n-3) were higher in ISO  
550 and OUT spat groups. In the past, these FA have been observed in neutral lipid fractions of bivalve  
551 spat [29, 31, 32, 87]. The inclusion of these FA in neutral lipids could explain for the observed high  
552 correlation of 18:1n-7, 18:2n-6 and 20:2n-6 with spat WI (Spearman  $R^2 > 0.8$   $p < 0.05$ , **Table 6**), as  
553 neutral lipids dominated the best performing spat groups.

#### 554 **4.3 Lipid class composition: TG content is higher in spat fed with efficient diets.**

555 The accumulation of neutral lipids (especially TG) mainly differentiated between efficient and poor  
556 diets, as evidenced from lipid class analysis, agreeing with previous authors on various bivalve  
557 species [29, 32, 80, 88]. Accumulation of TG in spat is connected with higher growth performances,  
558 as bivalve juveniles are known to accumulate lipid reserves during the summer to store energy for  
559 growth during the winter [25, 26, 88, 89]. This was also evidenced by the correlation observed by  
560 neutral lipid and TG content with WI (Spearman  $R^2 > 0.8$ ,  $p < 0.05$ , **Table 6**); similar correlations were  
561 observed in clams [32], mussel and scallops [90, 91] juveniles and larvae.

562 Main polar lipids classes (PE, PI, PS and PC) did not change between sample groups, as also reported  
563 by others [80]. Nevertheless, the two unidentified lipids Unkn<sub>10.81</sub> and Unkn<sub>12.05</sub> which resulted highly  
564 related to spat fed with *M. subterranean*, as these two lipids were principally observed in MONO.

565 The polar lipids of Eustigmatales, as *Monodopsis sp.*, are known to be rich sources of glycolipids as  
566 monogalactosylglycerols (MGDG) and digalactosylglycerols (DGDG), with minor  
567 sulphoquinovosyldiacylglycerol (SQDG) [92]. The elution time-windows for these lipids, observed  
568 from previous studies applying a similar NP-HPLC separation [93, 94], could match with these  
569 unidentified lipids. Phospholipase activities in juvenile spat are lower than neutral lipases, and  
570 influenced by the diet [95]. Therefore, we could hypothesise that high content of such glycolipids,  
571 coupled with the low nutritional quality of *M. subterranean* 848/1, might have mediated the partial  
572 assimilation of them. Another polar lipid class highly present in MONO resulted LysoPC. LysoPC are  
573 products of PC metabolism, formed by the cleavage of a FA residual in position sn-1 or sn-2 by a  
574 phospholipase A [96]. Increasing in LysoPC could be connected with the lower nutritional value of *M.*

575 *subterranean* 848/1 and the attempt to produce energy by polar lipid catabolism in the juvenile  
576 mussels. The catabolism of phospholipids was also observed on starved amphipods [97] and on crab  
577 larvae approaching metamorphosis [98].

578 **4.4 Membrane lipids, over TG, are also affected by the dietary PUFA supply: untargeted lipidomics**  
579 Large differences in spat lipids were observed from FA and lipid class composition composition  
580 analysis, however, the most complete overview of the lipidome was obtained by LC-MS analysis in  
581 untargeted lipidomics. This approach led to the identification of 343 lipid species in POS and 267 in  
582 NEG according to MS' (the complete lipid dataset is provided in **S1 Data**).

583 Similarly to what observed from lipid class analysis, TG was a major component in the discrimination  
584 between “fast growth”, “average growth” and T0 plus “slow growth” spat groups (**Figure 5**). Diets  
585 that promoted growth resulted in the accumulation of TG in spat, with several TG species highly  
586 correlated with spat WI (Spearman  $R^2 > 0.9$   $p < 0.05$ , **Table 6**). TG containing unsaturated FA ( $n^{\circ}$   
587 double bonds  $\geq 5$ ) were abundant in ISO and in OUT. These TG could be rich in 18C and 20C MUFA  
588 and PUFA which were observed in ISO and OUT spat. Few pieces of evidence are available on FA  
589 composition of specific lipid classes in bivalve spat. Caers, Coutteau (80) observed the accumulation  
590 of 18:2n-6 and 18:1n-9 principally in neutral lipid of *C. gigas* spat, whilst Soudant, Van Ryckeghem  
591 (87) reported the accumulation of 18:2n-6, 18:4n-3 and 18:3n-3 in neutral lipids of gonads of adults  
592 scallops (*Pecten maximus*) fed with T-Iso. Relevant is the case of TG (60:13) and TG (60:14), which  
593 were mainly observed in CYL. The elevated unsaturation and carbon content of these TG suggests  
594 the possible incorporation of long-chained PUFA, as AA which was copiously provided in *C. fusiformis*  
595 and accumulated in CYL. Long-chain PUFAs are commonly found esterified in polar lipids, however,  
596 when these are provided in excess of bivalves' nutritional requirements, these can be accumulated  
597 into neutral lipids. Indeed, when Caers, Coutteau (29) supplied an excess of DHA to *C. gigas* spat,  
598 observed an increasing % of this FA in the neutral lipids fraction, although on standard conditions  
599 DHA was principally found in polar lipids. Lastly, TG(48:2)a and TG(50:2) were abundant in NANNO.

600 Observing the NANNO FA profile, shorter chained MUFA were accumulated, so possibly these TG  
601 included 16:1n-7 and 18:1n-9 and SAFA as FA residuals.

602 Working at single lipid species level allowed to capture changes in the composition of polar lipids of  
603 the spat, which were not observed from lipid class analysis due to the different separation employed  
604 in the two techniques. PC and PE are the main polar lipid components in bivalves [62, 64, 65, 67, 87,  
605 99]. Bivalves have well-conserved PC structures, with a SAFA (16:0 and minor 18:0) in sn-1 position  
606 and an unsaturated PUFA (EPA or DHA) on sn-2 [99]. Recently these structures have been also  
607 confirmed via LC-MS/MS on *M. edulis*, observing that the most common PC species in bivalves  
608 resulted in PC(36:5), PC(38:6) and PC(38:5) and for the plasmalogens PC(O-36:5), PC(O-38:5), PC(O-  
609 38:6), PC(P-38:5) [64]. These are mostly in agreement to what observed for T0 spat, which was  
610 characterised by PC(36:5), PC(38:6) and their relative plasmalogens PC(O-36:5/P-36:4) and PC(O-  
611 38:6/P-38:5). The plasmalogens were principally observed in the OUT samples, possibly as a result of  
612 higher water temperatures, as an increase of plasmalogens on mussels between winter/spring and  
613 summer conditions was found by Facchini, Losito (62). When spat were fed *I. galbana*, PC(38:6) was  
614 highly abundant, as this might have incorporated a DHA molecule in the sn-2 position. Lower was  
615 the content of PC(36:5), compared with T0 in this group, due to the lack of EPA obtained via the diet  
616 and observed from ISO FA profile. On the contrary, large content of PC(36:5) was observed in  
617 NANNO, as *N. oceanica* was the richest source of EPA. Whilst PC(38:4), PC(38:5)a and PC(36:4) were  
618 abundant in CYL and in a lower extent in NANNO. Both *C. fusiformis* and *N. oceanica* provided AA,  
619 which might have been employed for synthesis of PC(36:4), whilst PC(38:4) could include 22:4n-6 as  
620 PUFA and PC(38:5)a could have been constituted by 22:5n-6 (both FA accumulated in CYL).

621 The NEG mode was dominated by polar lipids including PE, PI, CAEP and CL (**Figure 5B-D**). PE are the  
622 second major class of bivalves phospholipids [80, 99, 100], characterised by a small ethanolamine  
623 polar head, and are observed in specific domains of cell membranes as ion channels and cell-cell  
624 connections [50]. In bivalves, a large percentage of PE (around 40%) are plasmalogens [64, 65]. The

625 analysis of NEG data suggests that the PE with the highest intensity belonged all to the plasmalogen  
626 species (**Figure 5D**). The exact role of plasmalogens in bivalves is not fully understood, some  
627 hypothesis suggests their role as membrane permeability (as commonly rich in long-chain PUFA) and  
628 adaptation to environment changes [99]. The effect of the diet treatments on PE composition was  
629 less pronounced than what observed on PC, as a consequence of the large content of plasmalogens  
630 observed in this lipid class, which could not be resolved without the aid of MS/MS [101].  
631 Nevertheless, PE abundance in the spat diet groups could be somehow connected with the different  
632 dietary inputs. Lipids with 1-2 double bonds characterised NANNO, which was the group that  
633 accumulated the largest amount of FA 16:0, 16:1n-7 and 18:1n-9 (**Table 5**). Whilst PE and PS with 4  
634 and 5 double bonds were largely shared between CYL and NANNO (**Figure 5B**). PE(O-40:6/P-40:5)c  
635 was largely found in ISO and PE(38:4/P-38:3)b, PE(40:6)c, PE(O-40:7/40:6)a-b were mainly observed  
636 in T0 and OUT. SP and MONO were characterised by PE(O-38:2/P-38:1), PE(O-40:3/P-40:2) and PE(O-  
637 40:4/P-40:3).

638 Few PI were also relevant in group classification, with PI(40:5) abundant in CYL and NANNO,  
639 PI(40:3)b in ISO, and PI(38:5) and PI(40:6) in T0 and OUT. PI is a substrate for phospholipase C,  
640 yielding DAG (which are directed for phospholipid synthesis [102]) and inositol-1,4,5-trisphosphate  
641 (IP<sub>3</sub>), an important secondary messenger in Ca<sup>2+</sup> channels regulation. IP<sub>3</sub> is suspected to influence  
642 gonad maturation and fertilization in bivalves [104, 105]. The FA composition of PI can have a  
643 relevant role for physiological processes as reproduction and growth in bivalves. PI are commonly  
644 rich in AA and other long-chained PUFA, resulting in an important substrate for eicosanoids and  
645 prostaglandins production [99, 106].

646 Several CAEP species were also responsible for group clustering of NEG lipidomics dataset. CAEP is  
647 an important class of polar lipid in bivalves, often the third most abundant after PC and PE [107].  
648 CAEP and the closely related CPE belong to ceramide lipids and represent for invertebrates the  
649 analogues of vertebrates' sphingomyelins. Their existence and roles were mostly unknown until the



650 last decades when have been observed in several invertebrate species ranging from jellyfish to  
651 bivalves and insects [108, 109]. The chemical stability of CAEP, given by the sphingosine backbone  
652 and the C-P bond, making them between the most refractory components of the lipidome. The  
653 higher expression of CAEP(35:3) CAEP(36:3) observed in MONO and SP could be related to their  
654 resistance to degradation and action of lipases [63].

655 CL is a further group of phospholipids, in which a third glycerol molecule is acetylated in position sn-  
656 1' and sn-2' creating a pseudo symmetrical molecule [110]. CL are predominantly located inner  
657 mitochondrial membrane where exert a relevant role in the oxidative phosphorylation process [111].  
658 CL(88:24) and CL(88:23) were listed between the main lipids explaining for PLS-DA classification. in  
659 SP and MONO, compared with the remaining diets. Long-chain PUFA CL are common in bivalves, and  
660 the presence of CL(88:24) has been observed in the past in *P. maximus*, *C. gigas* and *M. edulis* [112],  
661 explaining for the relatively high abundance of such lipid in T0. In bivalves, CL composition is highly  
662 conserved in each between species, while tend to diverge between different molluscs [113, 114].  
663 However, stress conditions, resulting in oxidative stress and ROS production, also influence CL  
664 composition, due to the function of this particular lipid in cellular respiration [115]. Other authors  
665 evaluated the dietary effect on mitochondrial CL, observing an increase of PUFA containing CL in  
666 mice subjected to SFA and MUFA rich diets, and on the contrary, a relative decrement of certain  
667 PUFA containing CL in presence of PUFA rich diets [116]. This trend is interestingly similar to what  
668 observed in MONO and SP, which were subjected to nutritionally poor (SP) and PUFA low (MONO)  
669 diets. Nevertheless, no final conclusion on this observation could be made, as CL(88:23) was also  
670 highly observed in CYL and ISO (subjected respectively to EPA/AA and DHA rich diets).

## 671 **5 Conclusions**

672 Nursery bivalve production is the most economically demanding of bivalve hatchery practices, and at  
673 the same time newly settled juveniles are extremely delicate, suffering of high mortality right at the  
674 end of the hatchery production cycle, when their product value is at its maximum. Therefore,  
675 expanding existing knowledge of the nutritional physiology of this key life stage will have significant

676 effects for mussel aquaculture production and the ecology of this important species. Mussel spat  
677 represented an interesting model organism, as coupled fast metabolic rates (observed in the large  
678 differences observed between diet treatments in the relatively short time-frame of 4 weeks) and a  
679 simple holding set up (more robust and resistant of mussel larvae) to responses that are directly  
680 comparable to adult mussels.

681 Among the tested diets, *I galbana* offered the best results in term of GR and WI between laboratory-  
682 reared spat, suggesting the importance of DHA source for efficient growth of young mussels. The  
683 combination of the three lipid analysis techniques provided valuable information on spat lipid  
684 metabolism. Classical lipid profiling techniques as FA and lipid class analysis permitted easily to  
685 discriminate between low-performing and high-performing spat groups. Providing at least one  
686 source of essential C20 or C22 PUFA was necessary to the spat, resulting in minimal or absence of  
687 growth when no C20/C22 PUFA were supplied (MONO). Our data also suggest that the supply of  
688 only one main PUFA (EPA or DHA) might stimulate the spat to counterbalance the lack of the other  
689 essential FA (e.g. CYL subjected to surplus of AA, elongated to 22:4n-6 and desaturating that to  
690 22:5n-6 and in ISO, with increasing in content for FA 20:3 NMID under EPA shortage). FA analysis  
691 also evidenced how the best groups growth-wise, OUT, ISO, CYL and NANNO, accumulated MUFA,  
692 18C and 20C PUFA during the feeding trial. These groups were also characterised by large TG content  
693 as evidenced by lipid class analysis, which differentiated them from T0, SP and MONO.

694 All the jigsaw pieces were connected by lipidomics, which offered a clearer image of spat lipidome,  
695 (together) with the joint use of the other two traditional lipid analysis approaches. The advantage of  
696 lipidomics compared with traditional lipid profiling approaches dwells on the study of lipid molecular  
697 species. Through lipidomics, we observed a TG specific accumulation patterns between diets, linked  
698 with the accumulation of specific MUFA and PUFA in the spat. Furthermore, lipidomics evidenced  
699 deep changes in the relative abundance of main membrane lipid species in relation to the dietary  
700 essential PUFA supply; trends which were missed by lipid class profiling. A reason for this, aside the

701 higher sensitivity of the LC-MS apparatus, links with changes related to shifts in lipid molecular  
702 species abundance for each polar lipid class, rather than actual changes in lipid class abundance, and  
703 this is also the reason why, to our knowledge, it is the first time that such pattern is reported on  
704 bivalve juveniles. Visualising this trend through traditional lipid analysis techniques would require  
705 the FA profiling of purified lipid classes samples, often not feasible due to limited sample availability  
706 and instrument sensitivity. Lipidomics is powerful to streamline and expand lipid analysis possibilities  
707 on marine organisms, however, it comes with large and convoluted data, requiring the necessary  
708 ability to cope with that.

709 In the future, lipidomics could be a tool to answer several important biological questions regarding  
710 lipid metabolism of marine invertebrates, while at the same time expanding our knowledge on lipid  
711 classes which present logistical difficulties when tackled with traditional lipid profiling techniques. So  
712 far, the coverage of lipid ID available for marine invertebrates is rather small (74% for POS and 43%  
713 for NEG lipids could be confidently identified using existing online lipid mass spectra libraries), and  
714 acquisition of further fragmentation spectra is necessary to expand such online resources. The  
715 advancement of LC-MS platforms is an important driver for this process, but only the continuous  
716 application of these techniques on marine organisms can expand our possibilities to clearly define  
717 their metabolism and responses to the environment.

718

## 719 **6 Acknowledgements**

720 The authors declare no conflict of interest with the topic presented in this paper. We would like to  
721 thank Inverlussa Marine Services ([www.inverlussa.com](http://www.inverlussa.com)) for their support and spat supply and the  
722 Culture and Collection of Algae and Protozoans (CCAP) for the supply of the algae strains. The  
723 authors thanks also the Nutrition Analytical Services of the Institute of Aquaculture of the University  
724 of Stirling, Mr. James Dick for support and expertise during FAME analysis.

## 725 **7 Funding**

726 This study was funded by the European Social Fund and Scottish Funding Council as part of  
727 Developing Scotland's Workforce in the Scotland 2014-2020 European Structural and Investment  
728 Fund Programme (Ref: UHI\_SAMS\_DSW\_PGR\_AY16/17). The work was also funded through  
729 SAICHatch project funded by the Scottish Aquaculture Innovation Centre (SAIC,  
730 [www.scottishaquaculture.com](http://www.scottishaquaculture.com)).

731

## 732 **8 References**

- 733 1. Wijsman JWM, Troost K, Fang J, Roncarati A. Global Production of Marine Bivalves. Trends  
734 and Challenges. In: Smaal AC, Ferreira JG, Grant J, Petersen JK, Strand Ø, editors. Goods and Services  
735 of Marine Bivalves. Cham: Springer International Publishing; 2019. p. 7-26.
- 736 2. Venugopal V, Gopakumar K. Shellfish: Nutritive Value, Health Benefits, and Consumer Safety.  
737 *Comprehensive Reviews in Food Science and Food Safety*. 2017;16(6):1219-42. doi: 10.1111/1541-  
738 4337.12312.
- 739 3. Carboni S, Kaur G, Pryce A, McKee K, Desbois AP, Dick JR, et al. Mussel Consumption as a  
740 "Food First" Approach to Improve Omega-3 Status. *Nutrients*. 2019;11(6). Epub 2019/06/30. doi:  
741 10.3390/nu11061381. PubMed PMID: 31248159; PubMed Central PMCID: PMC6628055.
- 742 4. FAO. The state of world fisheries and aquaculture - meeting the sustainable development  
743 goals. Rome: FAO, 2018.
- 744 5. Higgins CB, Stephenson K, Brown BL. Nutrient bioassimilation capacity of aquacultured  
745 oysters: quantification of an ecosystem service. *Journal of Environment Quality*. 2011;40(1). doi:  
746 10.2134/jeq2010.0203.
- 747 6. Folke C, Kautsky N, Berg H, Jansson Å, Troell M. The ecological footprint concept for  
748 sustainable seafood production: A review. *Ecological Applications*. 1998;8(1):S63-S71.
- 749 7. Ferreira JG, Bricker SB. Goods and services of extensive aquaculture: shellfish culture and  
750 nutrient trading. *Aquaculture International*. 2016;24:803–25. doi: DOI 10.1007/s10499-015-9949-9.
- 751 8. Suplicy FM. A review of the multiple benefits of mussel farming. *Reviews in Aquaculture*.  
752 2018. doi: 10.1111/raq.12313.
- 753 9. Shumway SE, Davis C, Downey R, Karrney R, Kraeuthner J, Parsons J, et al. Shellfish  
754 aquaculture - in praise of sustainable economies and environments. *World Aquaculture*.  
755 2003;34(4):16-8.
- 756 10. Burge CA, Closek CJ, Friedman CS, Groner ML, Jenkins CM, Shore-Maggio A, et al. The Use of  
757 Filter-feeders to Manage Disease in a Changing World. *Integr Comp Biol*. 2016;56(4):573-87. Epub  
758 2016/07/03. doi: 10.1093/icb/icw048. PubMed PMID: 27371383.
- 759 11. Kochmann J, Buschbaum C, Volkenborn N, Reise K. Shift from native mussels to alien oysters:  
760 Differential effects of ecosystem engineers. *Journal of Experimental Marine Biology and Ecology*.  
761 2008;364(1):1-10. doi: 10.1016/j.jembe.2008.05.015.
- 762 12. Rittschof D, McClellan-Green P. Molluscs as multidisciplinary models in environment  
763 toxicology. *Marine Pollution Bulletin*. 2005;50(4):369-73. doi:  
764 <https://doi.org/10.1016/j.marpolbul.2005.02.008>.
- 765 13. Messina CM, Faggio C, Laudicella VA, Sanfilippo M, Trischitta F, Santulli A. Effect of sodium  
766 dodecyl sulfate (SDS) on stress response in the Mediterranean mussel (*Mytilus Galloprovincialis*):  
767 Regulatory volume decrease (Rvd) and modulation of biochemical markers related to oxidative  
768 stress. *Aquatic toxicology*. 2014;157:94-100.

- 769 14. Beukema JJ, Dekker R, van Stralen MR, de Vlas J. Large-scale synchronization of annual  
770 recruitment success and stock size in Wadden Sea populations of the mussel *Mytilus edulis* L.  
771 Helgoland Marine Research. 2015;69(4):327-33. doi: 10.1007/s10152-015-0440-9.
- 772 15. Alfaro AC, Jeffs AG, Creese RG. Bottom-drifting algal/mussel spat associations along a sandy  
773 coastal region in northern New Zealand. *Aquaculture*. 2004;241(1-4):269-90. doi:  
774 10.1016/j.aquaculture.2004.07.029.
- 775 16. Jacobs P, Beauchemin C, Riegman R. Growth of juvenile blue mussels (*Mytilus edulis*) on  
776 suspended collectors in the Dutch Wadden Sea. *Journal of Sea Research*. 2014;85:365-71. doi:  
777 10.1016/j.seares.2013.07.006.
- 778 17. STECF. Scientific, Technical and Economic Committee for Fisheries. Economic Report of the  
779 EU Aquaculture Sector (EWG16-12). Luxembourg: Publications Office of the European Union,, 2016.
- 780 18. Maguire JA, Knights T, Burnell G, Crowe T, O'Beirn F, McGrath D, et al. Management  
781 recommendations for the sustainable exploitation of mussel seed in the Irish Sea. 2007.
- 782 19. Kamermans P, Galley T, Boudry P, Fuentes J, McCombie H, Batista FM, et al. Blue mussel  
783 hatchery technology in Europe. 2013:339-73. doi: 10.1533/9780857097460.2.339.
- 784 20. Brousseau DJ. Analysis of growth rate in *Mya arenaria* using the Von Bertalanffy equation.  
785 *Marine Biology*. 1979;51(3):221-7. doi: 10.1007/bf00386801.
- 786 21. Cigarría J, Fernández JM. Management of Manila clam beds I. Influence of seed size, type of  
787 substratum and protection on initial mortality. *Aquaculture*. 2000;182:173-82.
- 788 22. Lauzon-Guay J-S, Dionne M, Barbeau MA, Hamilton DJ. Effects of seed size and density on  
789 growth, tissue-to-shell ratio and survival of cultivated mussels (*Mytilus edulis*) in Prince Edward  
790 Island, Canada. *Aquaculture*. 2005;250(3-4):652-65. doi: 10.1016/j.aquaculture.2005.03.049.
- 791 23. Thompson RJ. Production, reproductive effort, reproductive value and reproductive cost in a  
792 population of the blue mussel *Mytilus edulis* from a subarctic environment. *Marine Ecology Progress  
793 Series*. 1984;16:249-57.
- 794 24. Helm MM, Bourne N. Hatchery culture of bivalves: a practical manual;. Lovatelli A, editor.  
795 Rome: FAO, Food and Agriculture Organization; 2004.
- 796 25. Holland DL, Hannant PJ. Biochemical changes during growth of the spat of the oyster, *Ostrea  
797 edulis* L. *Journal of the Marine Biological Association of the United Kingdom*. 1974;54. doi:  
798 10.1017/s0025315400057726.
- 799 26. Whyte JNC, Boume N, Hodgson CA. Assessment of biochemical composition and energy  
800 reserves in larvae of the scallop *Patinopecten yessoensis*. *J Exp Mar Biol Ecol*. 1987;113:113-24.
- 801 27. Albentosa M, Labarta U, Fernández-Reiriz JM, Pérez-Camacho A. Fatty acid composition of  
802 *Ruditapes decussatus* spat fed on different microalgae diets. *Comp Biochem Physiol*.  
803 1996;113A(2):113-9.
- 804 28. Albentosa M, Fernández-Reiriz JM, Perez-Camacho A, Labarta U. Growth performance and  
805 biochemical composition of *Ruditapes decussatus* (L.) spat fed on microalgal and wheatgerm flour  
806 diets. *Journal of Experimental Marine Biology and Ecology*. 1999;232:23-37.
- 807 29. Caers M, Coutteau P, Sorgeloos P. Incorporation of different fatty acids, supplied as  
808 emulsions or liposomes, in the polar and neutral lipids of *Crassostrea gigas* spat. *Aquaculture*.  
809 2000;186:157-71.
- 810 30. Caers M, Coutteau P, Lombeida P, Sorgeloos P. The effect of lipid supplementation on  
811 growth and fatty acid composition of *Tapes philippinarum* spat. *Aquaculture*. 1998;162:287-99.
- 812 31. Caers M, Coutteau P, Sorgeloos P. Dietary impact of algal and artificial diets, fed at different  
813 feeding rations, on the growth and fatty acid composition of *Tapes philippinarum* (L.) spat.pdf>.  
814 *Aquaculture*. 1999;170:307-22.
- 815 32. Fernandez-Reiriz MJ, Labarta U, Albentosa M, Perez-Camacho A. Lipid composition of  
816 *Ruditapes philippinarum* spat: effect of ration and diet quality. *Comp Biochem Physiol B Biochem  
817 Mol Biol*. 2006;144(2):229-37. Epub 2006/05/02. doi: 10.1016/j.cbpb.2006.02.015. PubMed PMID:  
818 16647874.

- 819 33. Reis Batista I, Kamermans P, Verdegem MCJ, Smaal AC. Growth and fatty acid composition of  
820 juvenile *Cerastoderma edule* (L.) fed live microalgae diets with different fatty acid profiles.  
821 Aquaculture Nutrition. 2014;20(2):132-42. doi: 10.1111/anu.12059.
- 822 34. Laing I, Psimopoulos A. Hatchery cultivation of king scallop (*Pecten maximus*) spat with  
823 cultured and bloomed algal diets. Aquaculture. 1998;169:55-68.
- 824 35. Laing I. Effect of temperature and ration on growth and condition of king scallop (*Pecten*  
825 *maximus*) spat. Aquaculture. 2000;183(325-334).
- 826 36. Saucedo PE, González-Jiménez A, Acosta-Salmón H, Mazón-Suástegui JM, Ronsón-Paulín JA.  
827 Nutritional value of microalgae-based diets for lions-paw scallop (*Nodipecten subnodosus*) juveniles  
828 reared at different temperatures. Aquaculture. 2013;392-395:113-9. doi:  
829 10.1016/j.aquaculture.2013.02.001.
- 830 37. Flores-Vergara C, Cordero-Esquivel B, Ceron-Ortiz AN, Arredondo-Vega BO. Combined effects  
831 of temperature and diet on growth and biochemical composition of the Pacific oyster *Crassostrea*  
832 *gigas* (Thunberg) spat. Aquaculture Research. 2004;35(12):1131-40. doi: 10.1111/j.1365-  
833 2109.2004.01136.x.
- 834 38. Numaguchi K. Evaluation of five microalgal species for the growth of early spat of the  
835 Japanese pearl oyster *Pinctada fucata martensii*. Journal of Shellfish Research. 2000;19(1):153-7.  
836 PubMed PMID: WOS:000088636000027.
- 837 39. Lodeiros CJ, Freites L, Márquez A, Glem ME, Guevara M, Saucedo PE. Comparative growth  
838 and survival of spat of the Caribbean pearl oyster, *Pinctada imbricata* cultivated indoor with  
839 microalgae diets and outdoor with natural diet. Aquaculture Nutrition. 2017;23(3):511-22. doi:  
840 10.1111/anu.12419.
- 841 40. Soudant P, Sanles MV, Quere C, Le Coz JR, Marty Y, Moal J, et al. The use of lipid emulsions  
842 for sterol supplementation of spat of the Pacific oyster, *Crassostrea gigas*. Aquaculture.  
843 2000;184:315-26.
- 844 41. Wikfors GH, Patterson GW, Gosh P, Lewin RA, Smith BC, Alix JH. Growth of post-set oysters,  
845 *Crassostrea virginica*, on high-lipid strains of algal flagellates *Tetraselmis spp.* Aquaculture.  
846 1996;143:411-9.
- 847 42. Ronquillo JD, Fraser J, McConkey A-J. Effect of mixed microalgal diets on growth and  
848 polyunsaturated fatty acid profile of European oyster (*Ostrea edulis*) juveniles. Aquaculture.  
849 2012;360-361:64-8. doi: 10.1016/j.aquaculture.2012.07.018.
- 850 43. Nevejan N, Davis J, Little K, Killion A. Use of a formulated diet for mussel spat *Mytilus*  
851 *galloprovincialis* (Lamarck 1819) in a commercial hatchery. Journal of Shellfish Research.  
852 2007;26(2):357-63.
- 853 44. Thompson RJ, Bayne BL. Some relationships between growth, metabolism and food in the  
854 mussel *Mytilus edulis*. Marine Biology. 1974;27(4):317-26. doi: 10.1007/bf00394367.
- 855 45. Tamayo D, Azpeitia K, Markaide P, Navarro E, Ibarrola I. Food regime modulates  
856 physiological processes underlying size differentiation in juvenile intertidal mussels *Mytilus*  
857 *galloprovincialis*. Marine Biology. 2016;163(6). doi: 10.1007/s00227-016-2905-z.
- 858 46. Gui Y, Zamora L, Dunphy BJ, Jeffs AG. Evaluation of the formulated diet MySpat for feeding  
859 hatchery-reared spat of the green-lipped mussel, *Perna canaliculus* (Gmelin, 1791). Aquaculture  
860 Research. 2016;47(12):3907-12. doi: 10.1111/are.12841.
- 861 47. Guedes AC, Malcata FX. Nutritional value and uses of microalgae in Aquaculture. In:  
862 Muchlisin Z, editor. Aquaculture: InTech; 2012.
- 863 48. Waldock MJ, Holland DL. Fatty acid metabolism in young oysters, *Crassostrea gigas*:  
864 Polyunsaturated fatty acids. Lipids. 1984;19(5):332. doi: 10.1007/bf02534783.
- 865 49. da Costa F, Robert R, Quere C, Wikfors GH, Soudant P. Essential fatty acid assimilation and  
866 synthesis in larvae of the bivalve *Crassostrea gigas*. Lipids. 2015;50(5):503-11. doi: 10.1007/s11745-  
867 015-4006-z. PubMed PMID: 25771891.
- 868 50. Wenk MR. Lipidomics: new tools and applications. Cell. 2010;143(6):888-95. doi:  
869 10.1016/j.cell.2010.11.033. PubMed PMID: 21145456.

- 870 51. Han X, Gross RW. Global analyses of cellular lipidomes directly from crude extracts of  
871 biological samples by ESI mass spectrometry: a bridge to lipidomics. *J Lipid Res.* 2003;44(6):1071-9.  
872 Epub 2003/04/03. doi: 10.1194/jlr.R300004-JLR200. PubMed PMID: 12671038.
- 873 52. Cajka T, Fiehn O. Comprehensive analysis of lipids in biological systems by liquid  
874 chromatography-mass spectrometry. *Trends Analyt Chem.* 2014;61:192-206. Epub 2014/10/14. doi:  
875 10.1016/j.trac.2014.04.017. PubMed PMID: 25309011; PubMed Central PMCID: PMC4187118.
- 876 53. Laudicella VA, Whitfield PD, Carboni S, Doherty MK, Hughes AD. Application of lipidomics in  
877 bivalve aquaculture, a review. *Reviews in Aquaculture.* 2019. doi: 10.1111/raq.12346.
- 878 54. Folch J, Lees M, Sloane Stanley GH. A simple method for the isolation and purification of  
879 total lipids from animal tissues. *J Biol Chem.* 1957;226(1):497-509.
- 880 55. AOCS. Saturated, cis-Monounsaturated, and cis-Polyunsaturated Fatty Acids in Marine and  
881 Other Oils Containing Long Chain Polyunsaturated Fatty Acids (PUFAs) by Capillary GLC. In: Society  
882 AOC, editor. Official Method and recommended practices of the AOCS. 7th edition ed2007.
- 883 56. Ackman RG. Fish lipids. In: Connell JJ, editor. *Advances in Fish Science and Technology.*  
884 Farnham,: Fishing News Books; 1980. p. 83-103.
- 885 57. Graeve M, Janssen D. Improved separation and quantification of neutral and polar lipid  
886 classes by HPLC-ELSD using a monolithic silica phase: application to exceptional marine lipids. *J*  
887 *Chromatogr B Analyt Technol Biomed Life Sci.* 2009;877(20-21):1815-9. Epub 2009/06/06. doi:  
888 10.1016/j.jchromb.2009.05.004. PubMed PMID: 19493709.
- 889 58. Oksanen J, Blanchet FG, Friendly M, Kindt R, Legendre P, McGlenn D, et al. Package 'vegan'.  
890 2.5-3 ed2018.
- 891 59. Benjamini Y, Hochberg Y. Controlling the false discovery rate: a practical and powerful  
892 approach to multiple testing. *Journal of the Royal statistical society: series B (Methodological).*  
893 1995;57(1):289-300.
- 894 60. Losito I, Facchini L, Valentini A, Cataldi TRI, Palmisano F. Fatty acidomics: Evaluation of the  
895 effects of thermal treatments on commercial mussels through an extended characterization of their  
896 free fatty acids by liquid chromatography - Fourier transform mass spectrometry. *Food Chem.*  
897 2018;255:309-22. Epub 2018/03/25. doi: 10.1016/j.foodchem.2018.02.073. PubMed PMID:  
898 29571481.
- 899 61. Facchini L, Losito I, Cianci C, Cataldi TR, Palmisano F. Structural characterization and profiling  
900 of lyso-phospholipids in fresh and in thermally stressed mussels by hydrophilic interaction liquid  
901 chromatography-electrospray ionization-Fourier transform mass spectrometry. *Electrophoresis.*  
902 2016;37(13):1823-38. Epub 2016/02/11. doi: 10.1002/elps.201500514. PubMed PMID: 26860242.
- 903 62. Facchini L, Losito I, Cataldi TRI, Palmisano F. Seasonal variations in the profile of main  
904 phospholipids in *Mytilus galloprovincialis* mussels: A study by hydrophilic interaction liquid  
905 chromatography-electrospray ionization Fourier transform mass spectrometry. *J Mass Spectrom.*  
906 2018;53(1):1-20. Epub 2017/09/12. doi: 10.1002/jms.4029. PubMed PMID: 28892241.
- 907 63. Facchini L, Losito I, Cataldi TR, Palmisano F. Ceramide lipids in alive and thermally stressed  
908 mussels: an investigation by hydrophilic interaction liquid chromatography-electrospray ionization  
909 Fourier transform mass spectrometry. *J Mass Spectrom.* 2016;51(9):768-81. doi: 10.1002/jms.3832.  
910 PubMed PMID: 27479706.
- 911 64. Yin FW, Zhou DY, Zhao Q, Liu ZY, Hu XP, Liu YF, et al. Identification of glycerophospholipid  
912 molecular species of mussel (*Mytilus edulis*) lipids by high-performance liquid chromatography-  
913 electrospray ionization-tandem mass spectrometry. *Food Chem.* 2016;213:344-51. doi:  
914 10.1016/j.foodchem.2016.06.094. PubMed PMID: 27451190.
- 915 65. Liu ZY, Zhou DY, Zhao Q, Yin FW, Hu XP, Song L, et al. Characterization of glycerophospholipid  
916 molecular species in six species of edible clams by high-performance liquid chromatography-  
917 electrospray ionization-tandem mass spectrometry. *Food Chem.* 2017;219:419-27. Epub  
918 2016/10/22. doi: 10.1016/j.foodchem.2016.09.160. PubMed PMID: 27765247.

- 919 66. Guercia C, Cianciullo P, Porte C. Analysis of testosterone fatty acid esters in the digestive  
920 gland of mussels by liquid chromatography-high resolution mass spectrometry. *Steroids*.  
921 2017;123:67-72. Epub 2017/05/16. doi: 10.1016/j.steroids.2017.05.008. PubMed PMID: 28502861.
- 922 67. Donato P, Micalizzi G, Oteri M, Rigano F, Sciarrone D, Dugo P, et al. Comprehensive lipid  
923 profiling in the Mediterranean mussel (*Mytilus galloprovincialis*) using hyphenated and  
924 multidimensional chromatography techniques coupled to mass spectrometry detection. *Anal Bioanal*  
925 *Chem*. 2018;410(14):3297-313. Epub 2018/04/19. doi: 10.1007/s00216-018-1045-3. PubMed PMID:  
926 29666913.
- 927 68. Boselli E, Pacetti D, Lucci P, Frega NG. Characterization of phospholipid molecular species in  
928 the edible parts of bony fish and shellfish. *J Agric Food Chem*. 2012;60(12):3234-45. Epub  
929 2012/03/01. doi: 10.1021/jf205159a. PubMed PMID: 22369175.
- 930 69. Chen S, Belikova NA, Subbaiah PV. Structural elucidation of molecular species of pacific  
931 oyster ether amino phospholipids by normal-phase liquid chromatography/negative-ion electrospray  
932 ionization and quadrupole/multiple-stage linear ion-trap mass spectrometry. *Anal Chim Acta*.  
933 2012;735:76-89. Epub 2012/06/21. doi: 10.1016/j.aca.2012.05.035. PubMed PMID: 22713920;  
934 PubMed Central PMCID: PMC3566561.
- 935 70. Xia J, Chong J. MetaboanalystR: An R package for comprehensive analysis of metabolomics  
936 data. . 0.0.0.9000 ed2018.
- 937 71. Gromski PS, Muhamadali H, Ellis DI, Xu Y, Correa E, Turner ML, et al. A tutorial review:  
938 Metabolomics and partial least squares-discriminant analysis--a marriage of convenience or a  
939 shotgun wedding. *Anal Chim Acta*. 2015;879:10-23. Epub 2015/05/24. doi:  
940 10.1016/j.aca.2015.02.012. PubMed PMID: 26002472.
- 941 72. Lee M-C, Park JC, Lee J-S. Effects of environmental stressors on lipid metabolism in aquatic  
942 invertebrates. *Aquatic toxicology*. 2018;200:83-92.
- 943 73. Fidalgo JP, Cid A, Lopez-Munoz I, Abalde J, Herrero C. Growth and biochemical profile of  
944 juvenile mussels (*Mytilus galloprovincialis* Lmk) fed on different algal diets. *Journal of Shellfish*  
945 *Research*. 1994;13(1):67-75.
- 946 74. Karayücel S, Karayücel I. Spat collection growth and associated problems in mussel (*M. edulis*  
947 L.) in two Scottish sea lochs. *Turkish J Marine Sciences*. 2001;7:195-205.
- 948 75. Bresnan E, Cook KB, Hughes SL, Hay SJ, Smith K, Walsham P, et al. Seasonality of the  
949 plankton community at an east and west coast monitoring site in Scottish waters. *Journal of Sea*  
950 *Research*. 2015;105:16-29. doi: 10.1016/j.seares.2015.06.009.
- 951 76. Muñoz O, Revilla M, Rodríguez JG, Laza-Martínez A, Fontán A. Annual cycle of phytoplankton  
952 community through the water column: Study applied to the implementation of bivalve offshore  
953 aquaculture in the southeastern Bay of Biscay. *Oceanologia*. 2019;61(1):114-30. doi:  
954 10.1016/j.oceano.2018.08.001.
- 955 77. Parrish CC. Lipids in Marine Ecosystems. *ISRN Oceanography*. 2013;2013:1-16. doi:  
956 10.5402/2013/604045.
- 957 78. Langdon CJ, Waldock MJ. The effect of algal and artificial diets on the growth and fatty acid  
958 composition of *Crassostrea gigas* Spat. *Journal of the Marine Biological Association of the United*  
959 *Kingdom*. 1981;61(2):431-48. Epub 2009/05/11. doi: 10.1017/S0025315400047056.
- 960 79. Albentosa M, Pérez-Camacho A, Labarta U, Beiras R, Fernández-Reiriz MJ. Nutritional value  
961 of algal diets to clam spat *Venerupis pullastra*. *Marine Ecology Progress Series*. 1993;97(3):261-9.
- 962 80. Caers M, Coutteau P, Sorgeloos P. Impact of starvation and of feeding algal and artificial diets  
963 on the lipid content and composition of juvenile oysters (*Crassostrea gigas*) and clams (*Tapes*  
964 *philippinarum*). *Marine Biology*. 2000;136:891-9.
- 965 81. Knauer J, Southgate PC. Growth and fatty acid composition of Pacific oyster (*Crassostrea*  
966 *gigas*) spat fed a spray-dried freshwater microalga (*Spongiococcum excentricum*) and  
967 microencapsulated lipids. *Aquaculture*. 1997;154:293-303.
- 968 82. Delaunay F, Marty Y, Moal J, Samain JF. The effect of monospecific algal diets on growth and  
969 fatty acid composition of *Pecten maximus* (L.) larvae. *Jour Exp Mar Biol Ecol*. 1993;173:163-79.



- 970 83. Marty Y, Delaunay F, Moal J, Samain J-F. Changes in the fatty acid composition of *Pecten*  
971 *maximus* (L.) during larval development. *Journal of Experimental Marine Biology and Ecology*.  
972 1992;163(2):221-34.
- 973 84. Delaporte M. Effect of a mono-specific algal diet on immune functions in two bivalve species  
974 - *Crassostrea gigas* and *Ruditapes philippinarum*. *Journal of Experimental Biology*.  
975 2003;206(17):3053-64. doi: 10.1242/jeb.00518.
- 976 85. Retterstøl K, Haugen TB, Christophersen BO. The pathway from arachidonic to  
977 docosapentaenoic acid (20:4n-6 to 22:5n-6) and from eicosapentaenoic to docosahexaenoic acid  
978 (20:5n-3 to 22:6n-3) studied in testicular cells from immature rats. *Biochimica et Biophysica Acta*  
979 (BBA) - Molecular and Cell Biology of Lipids. 2000;1483(1):119-31. doi:  
980 [https://doi.org/10.1016/S1388-1981\(99\)00166-3](https://doi.org/10.1016/S1388-1981(99)00166-3).
- 981 86. Fernández-Reiriz MJ, Garrido JL, Irisarri J. Fatty acid composition in *Mytilus galloprovincialis*  
982 organs: trophic interactions, sexual differences and differential anatomical distribution. *Marine*  
983 *Ecology Progress Series*. 2015;528:221-34. doi: 10.3354/meps11280.
- 984 87. Soudant P, Van Ryckeghem K, Marty Y, Moal J, Samain JF, Sorgeloos P. Comparison of the  
985 lipid class and fatty acid composition between a reproductive cycle in nature and a standard  
986 hatchery conditioning of the Pacific Oyster *Crassostrea gigas*. *Comparative Biochemistry and*  
987 *Physiology Part B: Biochemistry and Molecular Biology*. 1999;123(2):209-22. doi: 10.1016/s0305-  
988 0491(99)00063-2.
- 989 88. Freitas L, Fernández-Reiriz JM, Labarta U. Lipid classes of mussel seeds *Mytilus*  
990 *galloprovincialis* of subtidal and rocky shore origin. *Aquaculture*. 2002;207:97-111.
- 991 89. Lawrence JM. Patterns of lipid storage in post-metamorphic marine invertebrates. *Amer*  
992 *Zool*. 1976;16:747-62.
- 993 90. Pernet F, Bricelj VM, Cartier S. Lipid class dynamics during larval ontogeny of sea scallops,  
994 *Placopecten magellanicus*, in relation to metamorphic success and response to antibiotics. *Journal of*  
995 *Experimental Marine Biology and Ecology*. 2006;329(2):265-80. doi: 10.1016/j.jembe.2005.09.008.
- 996 91. Pernet F, Tremblay R, Langdon C, Bourget E. Effect of additions of dietary triacylglycerol  
997 microspheres on growth, survival, and settlement of mussel (*Mytilus* sp.) larvae. *Marine Biology*.  
998 2004;144(4):693-703. doi: 10.1007/s00227-003-1234-1.
- 999 92. Menzel K, Wild A. Fatty acid composition in the lipids of some marine Chlorococcales and  
1000 Eustigmatales. *Z Naturforsch*. 1989;44c:743-8.
- 1001 93. Gerits LR, Pareyt B, Delcour JA. Single run HPLC separation coupled to evaporative light  
1002 scattering detection unravels wheat flour endogenous lipid redistribution during bread dough  
1003 making. *LWT - Food Science and Technology*. 2013;53(2):426-33. doi: 10.1016/j.lwt.2013.03.015.
- 1004 94. Abreu S, Solgadi A, Chaminade P. Optimization of normal phase chromatographic conditions  
1005 for lipid analysis and comparison of associated detection techniques. *J Chromatogr A*. 2017;1514:54-  
1006 71. Epub 2017/08/05. doi: 10.1016/j.chroma.2017.07.063. PubMed PMID: 28774713.
- 1007 95. Hoehne-Reitan K, Økland SN, Reitan KL. Neutral lipase and phospholipase activities in scallop  
1008 juveniles (*Pecten maximus*) and dietary algae. *Aquaculture Nutrition*. 2007;13:45-9.
- 1009 96. Sajiki J, Taguchi S. Phospholipid metabolism in bivalves and their feed plankton. *Bioscience,*  
1010 *Biotechnology, and Biochemistry*. 1995;59(6):1113-7. doi: 10.1271/bbb.59.1113.
- 1011 97. Maity S, Adamec J, Jannasch A, Höök TO, Nalepa T, Gribskov M, et al. Metabolite profiles in  
1012 starved *Diporeia* spp. using liquid chromatography-mass spectrometry (LC-MS) based metabolomics.  
1013 *Journal of Crustacean Biology*. 2012;32(2):239-48. doi: 10.1163/193724011x615578.
- 1014 98. Rey F, Alves E, Melo T, Domingues P, Queiroga H, Rosa R, et al. Unravelling polar lipids  
1015 dynamics during embryonic development of two sympatric brachyuran crabs (*Carcinus maenas* and  
1016 *Necora puber*) using lipidomics. *Sci Rep*. 2015;5:14549. Epub 2015/10/01. doi: 10.1038/srep14549.  
1017 PubMed PMID: 26419891; PubMed Central PMCID: PMC4588508.
- 1018 99. Soudant P, Marty Y, Moal J, Samain JF. Separation of major polar lipids in *Pecten maximus* by  
1019 highperformance liquid chromatography and subsequent determination of their fatty acids using gas  
1020 chromatography. *Journal of Chromatography B*. 1995;673(15-26).

- 1021 100. Bell MV, Sargent JR. Fatty acid analyses of phosphoglycerides from tissues of the clam  
1022 *Chlamys islandica* (muller) and the starfish *Ctenodiscus crispatus* (retzius) from Balsfjorden, Northern  
1023 Norway. J Exp Mar Biol Ecol. 1985;87:31-40.
- 1024 101. Koelmel JP, Ulmer CZ, Jones CM, Yost RA, Bowden JA. Common cases of improper lipid  
1025 annotation using high-resolution tandem mass spectrometry data and corresponding limitations in  
1026 biological interpretation. Biochim Biophys Acta. 2017;1862(8):766-70. Epub 2017/03/07. doi:  
1027 10.1016/j.bbali.2017.02.016. PubMed PMID: 28263877.
- 1028 102. Yen CL, Stone SJ, Koliwad S, Harris C, Farese RV, Jr. Thematic review series: glycerolipids.  
1029 DGAT enzymes and triacylglycerol biosynthesis. J Lipid Res. 2008;49(11):2283-301. Epub 2008/09/02.  
1030 doi: 10.1194/jlr.R800018-JLR200. PubMed PMID: 18757836; PubMed Central PMCID:  
1031 PMCPMC3837458.
- 1032 103. Trinkler N, Guichard N, Labonne M, Plasseraud L, Paillard C, Marin F. Variability of shell  
1033 repair in the Manila clam *Ruditapes philippinarum* affected by the Brown Ring Disease: A  
1034 microstructural and biochemical study. Journal of Invertebrate Pathology. 2011;106(3):407-17. doi:  
1035 <https://doi.org/10.1016/j.jip.2010.12.011>.
- 1036 104. Deguchi R, Osanai K, Morisawa M. Extracellular Ca<sup>2+</sup> entry and Ca<sup>2+</sup> release from inositol  
1037 1,4,5-trisphosphate-sensitive stores function at fertilization in oocytes of the marine bivalve *Mytilus*  
1038 *edulis*. Development. 1996;122(11):3651.
- 1039 105. Martínez G, Cisterna M. Role of second messenger IP<sub>3</sub> in the reproductive process of  
1040 *Argopecten purpuratus*. Invertebrate Reproduction & Development. 2004;46(1):27-33. doi:  
1041 10.1080/07924259.2004.9652602.
- 1042 106. Stanley-Samuelson DW. The biological significance of prostaglandins and related eicosanoids  
1043 in invertebrates. Integrative and Comparative Biology. 1994;34(6):589-98. doi:  
1044 <https://doi.org/10.1093/icb/34.6.589>.
- 1045 107. Kariotoglou DM, Mastronicolis SK. Phosphonolipids in the mussel *Mytilus galloprovincialis*. Z  
1046 Naturforsch. 1998;53c:888-96.
- 1047 108. Kariotoglou DM, Mastronicolis SK. Sphingophosphonolipid molecular species from edible  
1048 mollusks and a jellyfish. Comparative Biochemistry and Physiology Part B: Biochemistry and  
1049 Molecular Biology. 2003;136(1):27-44. doi: 10.1016/s1096-4959(03)00168-4.
- 1050 109. Matsubara T, Morita, M., Hayashi, A. Determination aminoethylphosphonate of the  
1051 presence of ceramide and ceramide N-methylaminoethylphosphonate in marine animals by fast  
1052 atom bombardment mass spectrometry. Biochimica and Biophysica Acta. 1990;1042:280-6.
- 1053 110. Fahy E, Subramaniam S, Brown HA, Glass CK, Merrill AH, Jr., Murphy RC, et al. A  
1054 comprehensive classification system for lipids. J Lipid Res. 2005;46(5):839-61. Epub 2005/02/22. doi:  
1055 10.1194/jlr.E400004-JLR200. PubMed PMID: 15722563.
- 1056 111. Mejia ME, Cole KL, Hatch HG. Cardiolipin Metabolism and the Role it Plays in Heart Failure  
1057 and Mitochondrial Supercomplex Formation. Cardiovascular & Haematological Disorders - Drug  
1058 Targetsrug Targets - Cardiovascular & Hematological Disorders). 2014;14(2):98-106.
- 1059 112. Kraffe E, Soudant P, Marty Y, Kervarec N, Jehan P. Evidence of a tetradocosaenoic  
1060 cardiolipin in some marine bivalves. Lipids. 2002;37(5):507-14. doi: 10.1007/s11745-002-0925-z.
- 1061 113. Kraffe E, Soudant P, Marty Y, Kervarec N. Docosaenoic acid-and eicosapentaenoic acid-  
1062 enriched cardiolipin in the manila clam *Ruditapes philippinarum*. Lipids. 2005;40(6):619-25. doi:  
1063 10.1007/s11745-005-1423-z.
- 1064 114. Kraffe E, Grall J, Le Duff M, Soudant P, Marty Y. A striking parallel between cardiolipin fatty  
1065 acid composition and phylogenetic belonging in marine bivalves: A possible adaptative evolution?  
1066 Lipids. 2008;43(10):961. doi: 10.1007/s11745-008-3219-9.
- 1067 115. Dudek J. Role of Cardiolipin in Mitochondrial Signaling Pathways. Front Cell Dev Biol.  
1068 2017;5:90. Epub 2017/10/17. doi: 10.3389/fcell.2017.00090. PubMed PMID: 29034233; PubMed  
1069 Central PMCID: PMCPMC5626828.
- 1070 116. Stavrovskaya IG, Bird SS, Marur VR, Sniatynski MJ, Baranov SV, Greenberg HK, et al. Dietary  
1071 macronutrients modulate the fatty acyl composition of rat liver mitochondrial cardiolipins. J Lipid

1072 Res. 2013;54(10):2623-35. Epub 2013/05/22. doi: 10.1194/jlr.M036285. PubMed PMID: 23690505;  
1073 PubMed Central PMCID: PMC3770076.

## 1074 Captions to supplementary material

### 1075 Figures

1076 **S1\_Fig: Turbidimetry data recorded before and after every feeding of the spat.**

1077 **S2\_Fig: Liquid chromatography mass spectrometry (LC-MS) profiles of spat total lipid extracts**  
1078 **(TLE).** ESI POS mode profiles left traces, NEG mode profiles right traces. Data are acquired at  
1079 precursor ion MS (MS') via high resolution LC-MS platform (Exactive, ThermoScientific). Plotted via  
1080 Excalibur 4.1 (ThermoScientific).

1081 **S3\_Fig: Principal Component Analysis of POS lipidomics spat dataset Plotted via MetaboAnalystR.**  
1082 *Cylindrotheca*: CYS, *Isochrysis*: ISO, *Monodopsis*: MONO, *Nannochloropsis*: NANNO, Outdoor: OUT,  
1083 QC: Quality control samples, Shell Paste: SP, T0: T0 samples.

1084 **S4\_Fig: Principal Component Analysis of NEG lipidomics spat dataset Plotted via MetaboAnalystR.**  
1085 *CYS Cylindrotheca fusiformis* fed spat, *ISO Isochrysis galbana* fed spat, *MONO Monodopsis*  
1086 *subterranean* fed spat, *NANNO Nannochloropsis oceanica* fed spat, *OUT* Outdoor deployed spat, *QC*:  
1087 Quality control samples, *SP ShellPaste* fed spat, *T0*: T0 samples.

1088 **S5\_Fig: PLS-DA analysis of spat lipidomics dataset POS Model fitting: 2000-fold Permutation test.**  
1089 Plotted and calculated via MetaboAnalystR.

1090 **S6\_Fig: PLS-DA analysis of spat lipidomics dataset POS: Model fitting: 10-fold leave one out –Cross-**  
1091 **validation analysis LOOCV.**  $Q_2$  used as parameter of model fitting. Plotted and calculated via  
1092 MetaboAnalystR..

1093 **S7\_Fig: PLS-DA analysis of spat lipidomics dataset NEG: Model fitting: 2000-fold Permutation test.**  
1094 Plotted and calculated via MetaboAnalystR.

1095 **S8\_Fig: PLS-DA analysis of spat lipidomics dataset NEG: Model fitting: 10-fold leave one out –**  
1096 **Cross-validation analysis LOOCV.**  $Q_2$  used as parameter of model fitting. Plotted and calculated via  
1097 MetaboAnalystR.

1098 **S9\_Fig: Partial least squares discriminant analysis (PLS-DA) plots of untargeted lipidomics data**  
1099 **acquired in positive ionization mode.** Full data is used in this model including unknown features.  
1100 *Plotted via MetaboAnalystR.*

1101 **S10\_Fig: Partial least squares discriminant analysis (PLS-DA) plots of untargeted lipidomics data**  
1102 **acquired in Negative ionization mode.** Full data is used in this model including unknown features.  
1103 *Plotted via MetaboAnalystR.*

1104 **S11\_Fig: Heatmap plot for the top 30 VIP evidenced by PLS-DA analysis of spat untargeted**  
1105 **lipidomics data in Positive ionization mode.** Full data is here used, including unknown features.  
1106 Euclidean distance was distance measure, Ward as clustering algorithm. Lipids are reported as class,  
1107  $n^\circ$  carbon and  $n^\circ$  of double bonds (e.g. TG5810). Colour coding for lipid expression from Blue (Low)  
1108 to red (High).

1109 **S12\_Fig: Heatmap for the top 30 VIP scores evidenced by PLS-DA analysis of spat untargeted**  
1110 **lipidomics data in Negative (NEG) ionization mode.** Euclidean distance was used as distance  
1111 measure, Ward was used as a clustering algorithm. Lipids are reported as class,  $n^\circ$  carbon and  $n^\circ$  of  
1112 double bonds (e.g. TG.58.10). Colour coding for lipid expression from Blue (Low) to red (High). In

1113 absence of an exact mass ID features are reported as ret. time<sub>mass</sub>/charge (e.g.  
1114 8.86\_1019.5664m/z) or ret. time<sub>neutral mass</sub> (e.g. 11.13\_1330.7461n).

#### 1115 **Tables**

1116 **S1\_Table: Main adducts and exact masses (for positive and negative ionization) of the lipid**  
1117 **standard mixture used for exact mass (MS') identification of lipidomics data.**

#### 1118 **Data**

1119 **S1\_Data: Peak intensity tables obtained by the processing of lipidomics data via Progenesis QI**  
1120 **software.** During data processing chromatograms were aligned to a QC samples, peak picking was  
1121 done following automatic configuration of the software and inserting a threshold background noise  
1122 of 1xE5 (POS) and 1xE4 (NEG). Samples are reported as normalised abundance. The reported PIT was  
1123 furtherly processed via MetaboanalysR as reported in the main text of the paper. Compounds  
1124 identifiers are found on Column A. Samples are found after column G. Accepted identification codes  
1125 are given according Lipid Maps and HMDB codes. Lipid ID was provided from exact MS' with  $\Delta$ ppm  
1126 <5 and relative adduct (as reported in S1\_Table).

1127 **S2\_Data: Spearman correlation matrix between important lipids highlighted from fatty acids (FA),**  
1128 **lipid class and lipidomics (POS/NEG) dataset and growth rate (GR) and weight increase (WI) of**  
1129 **spat.** Relative abundances were employed for lipidomics data, whilst absolute values were used for  
1130 FA and lipid class. Correlation values were calculated via R statistical software (v 3.5).

1131

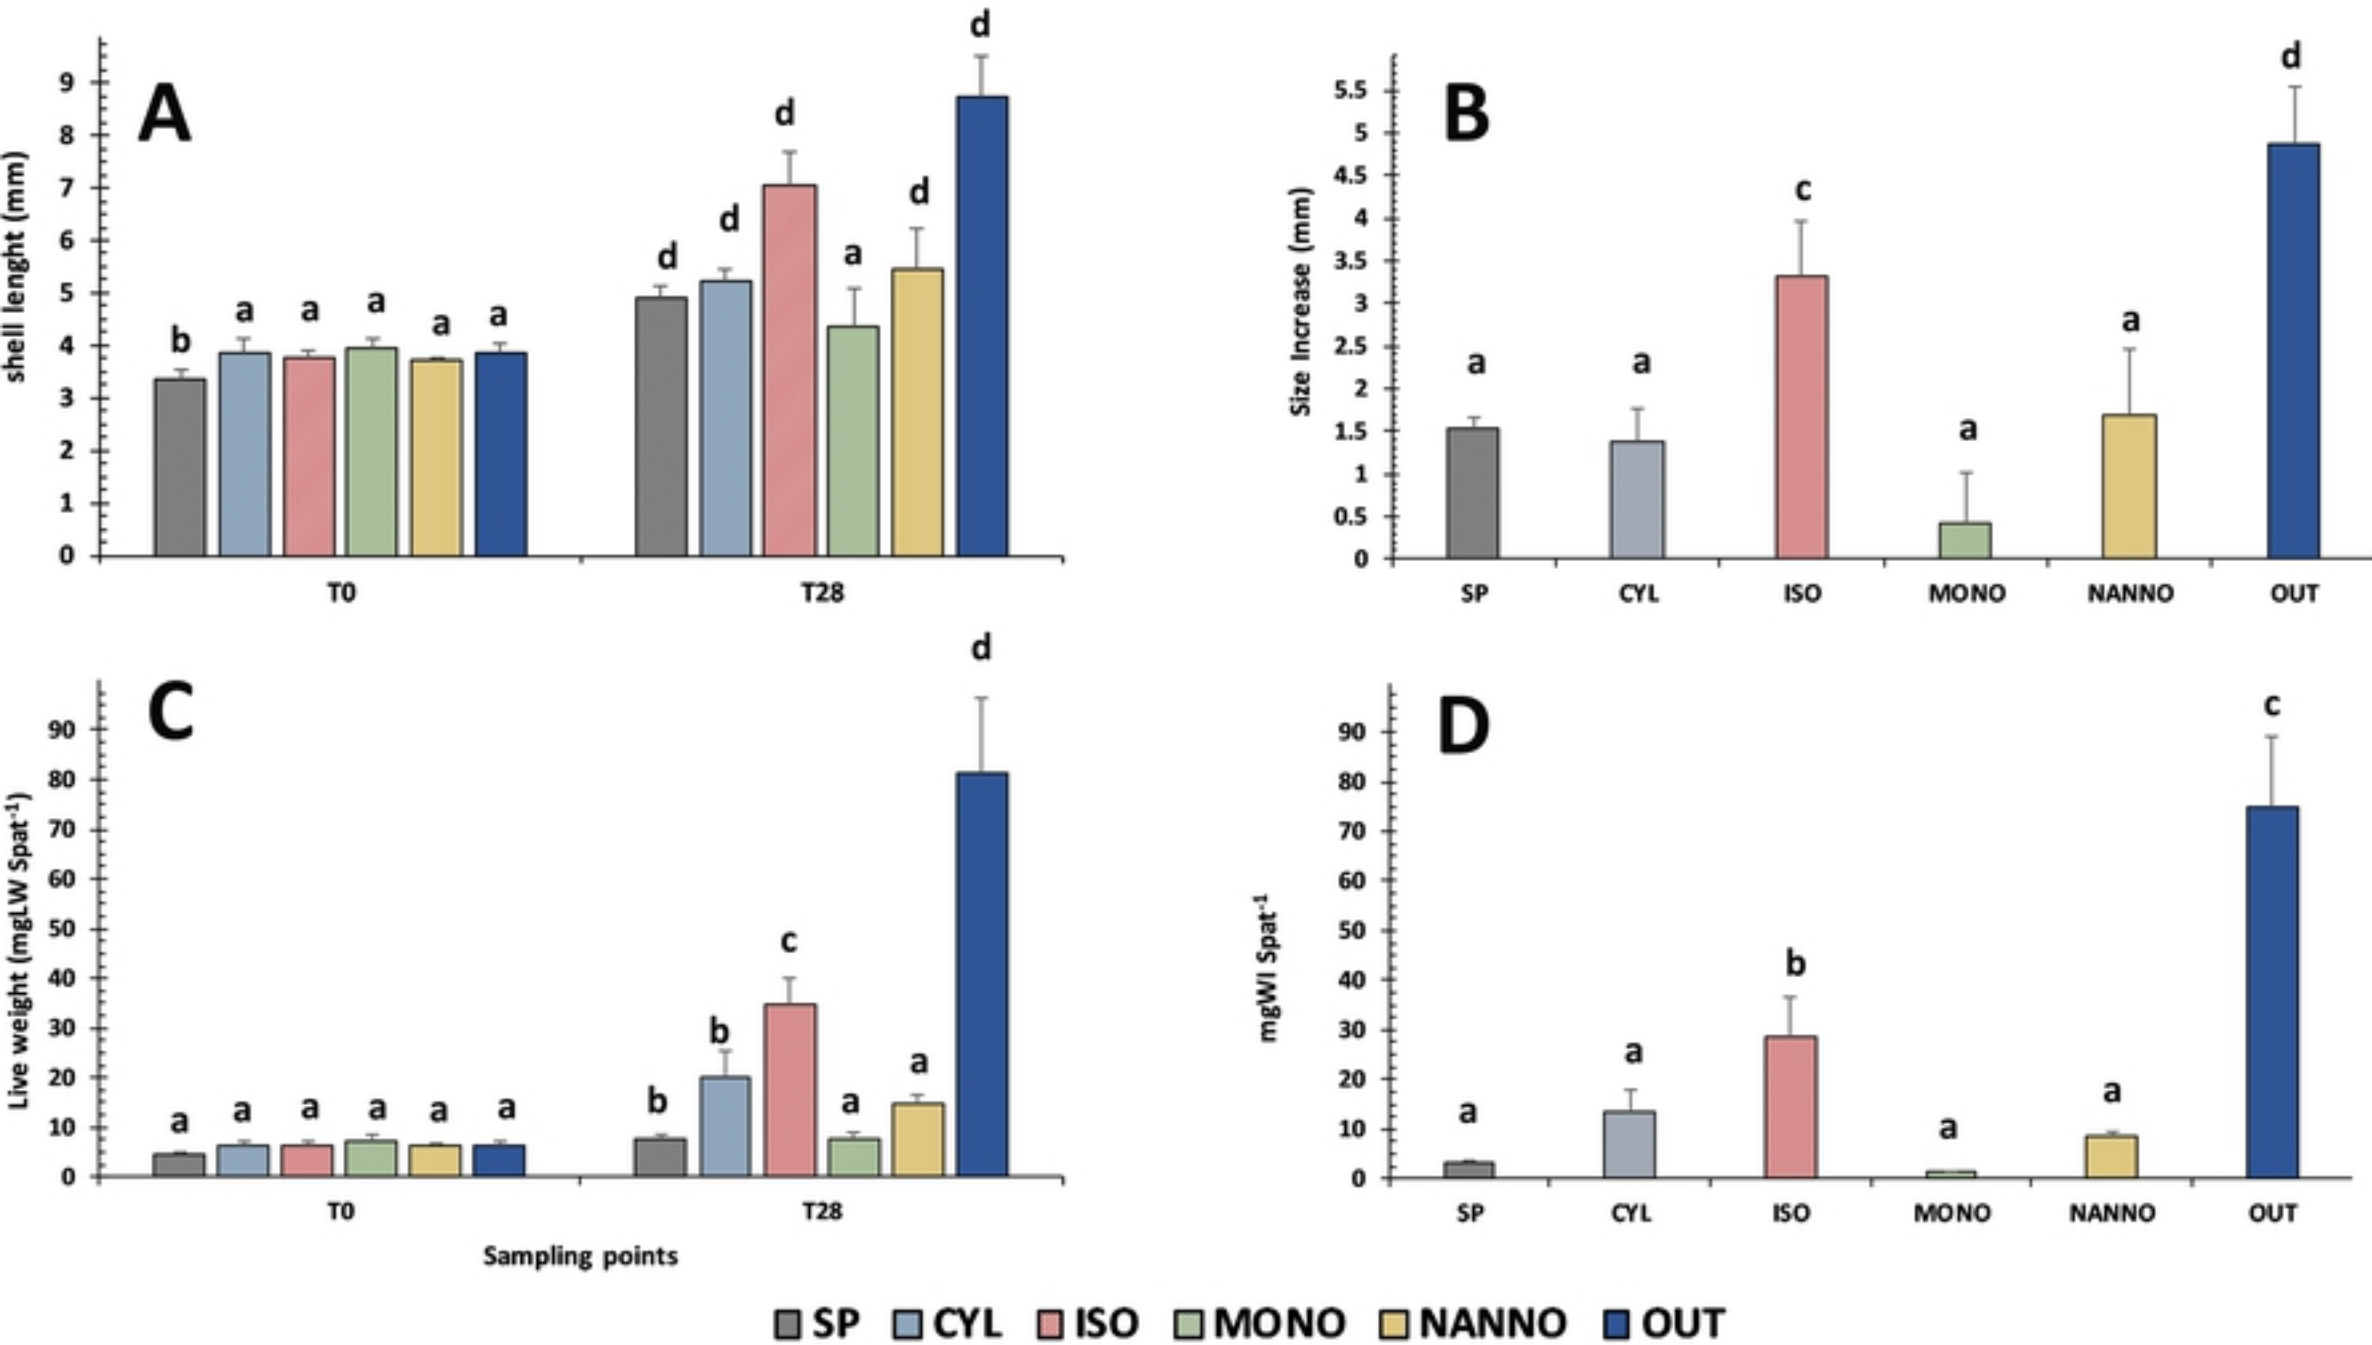

Figure 1

NMDS2

2D Stress: 0.085

NMDS1

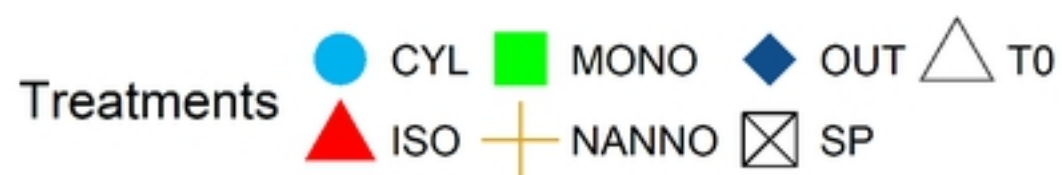

Figure2

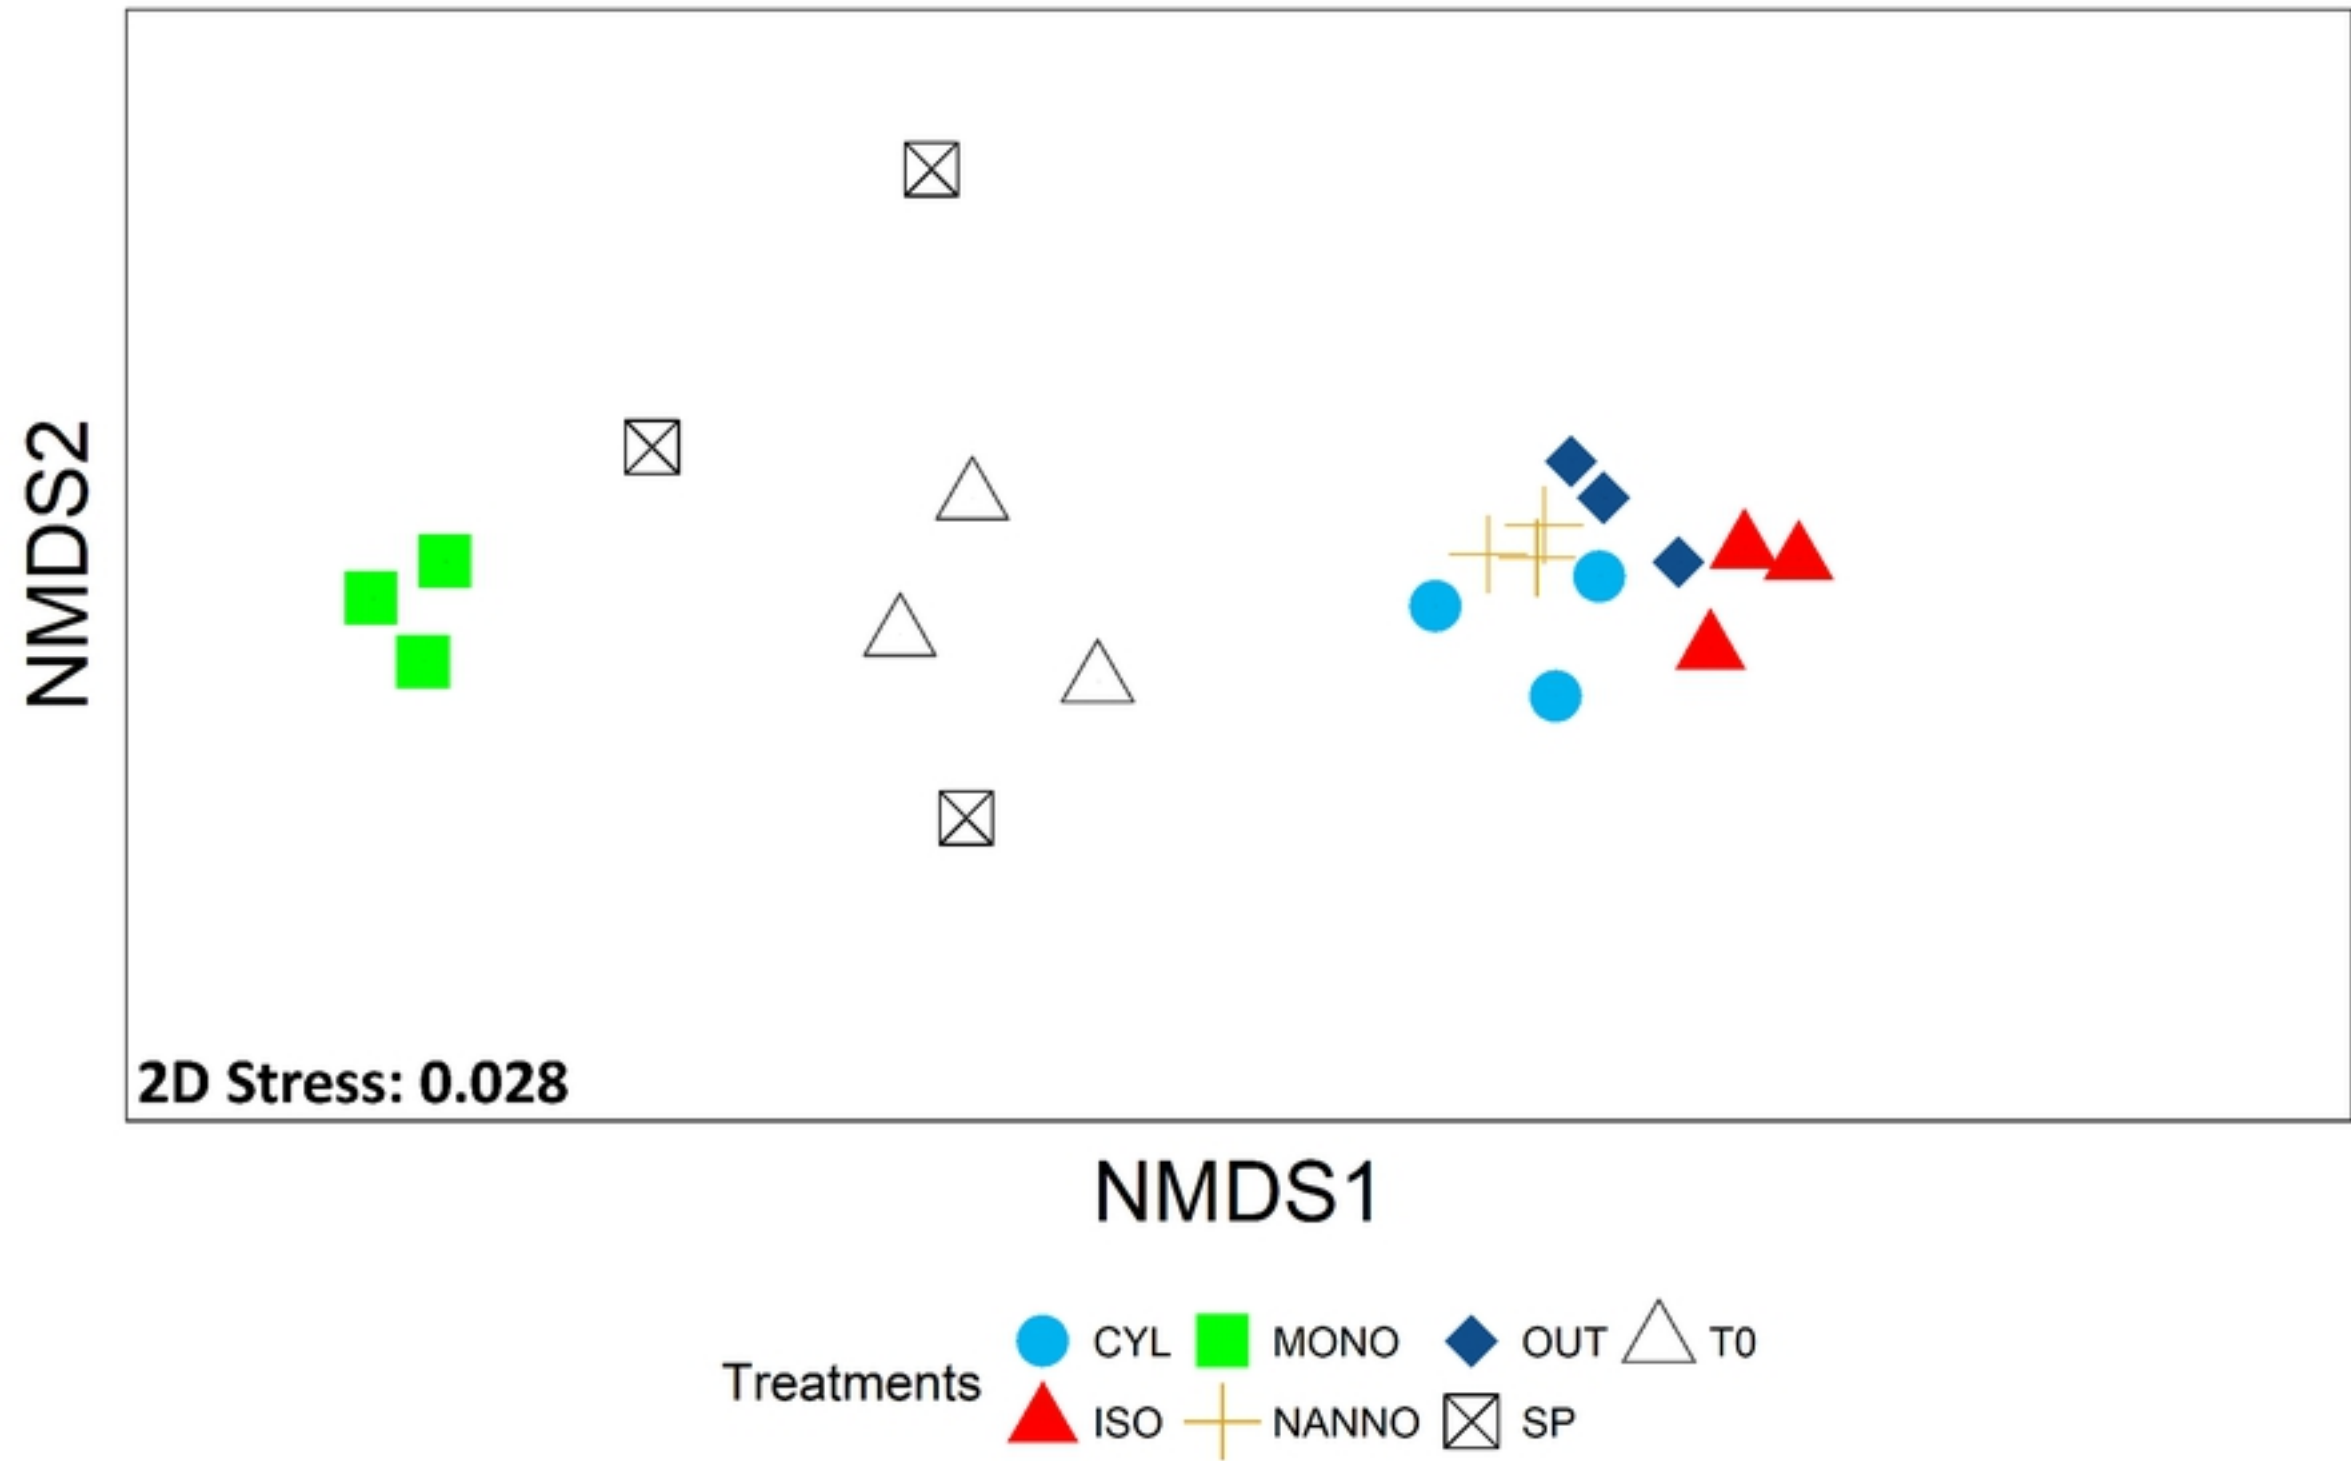

Figure3

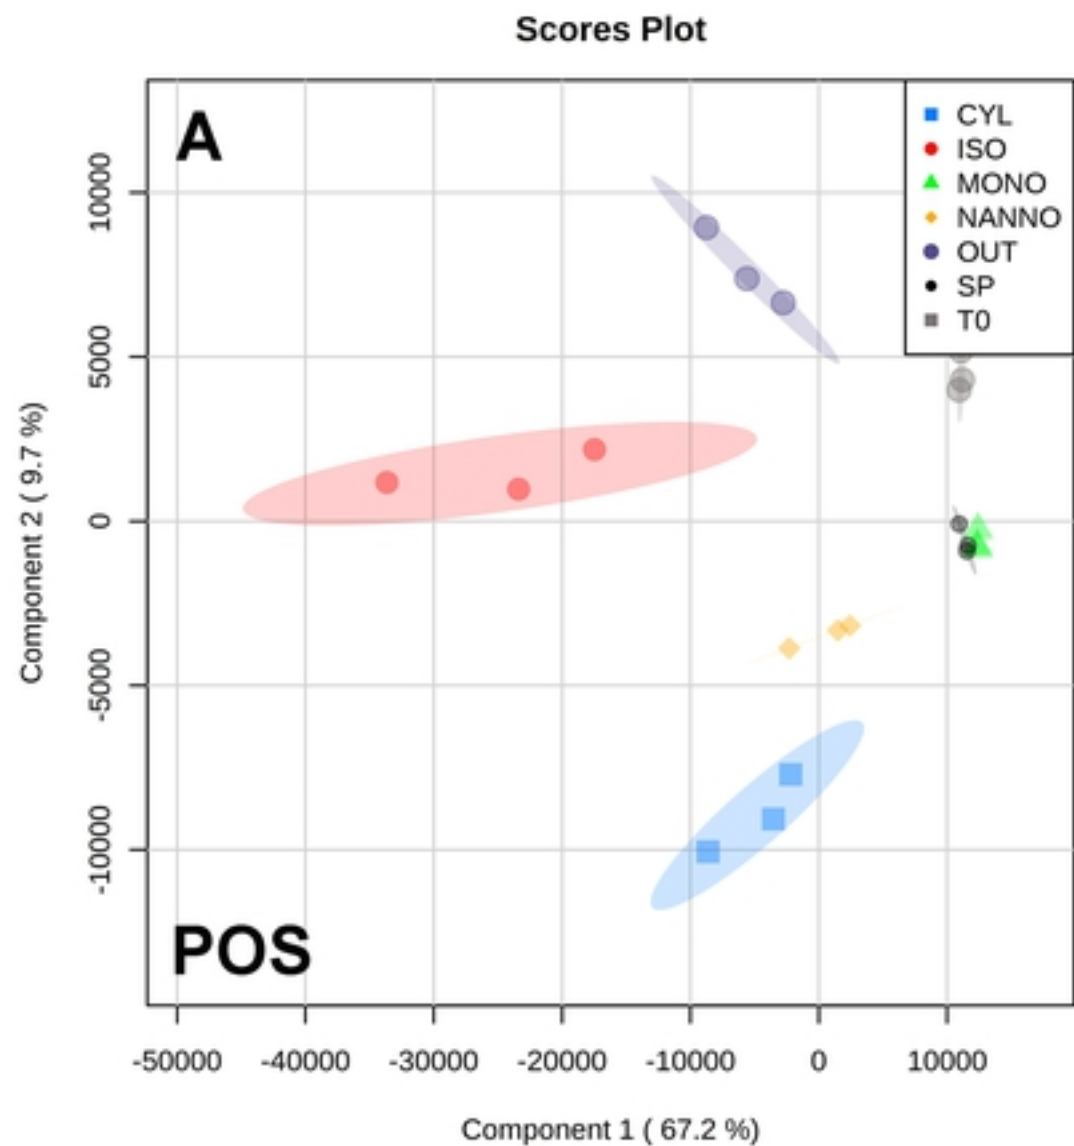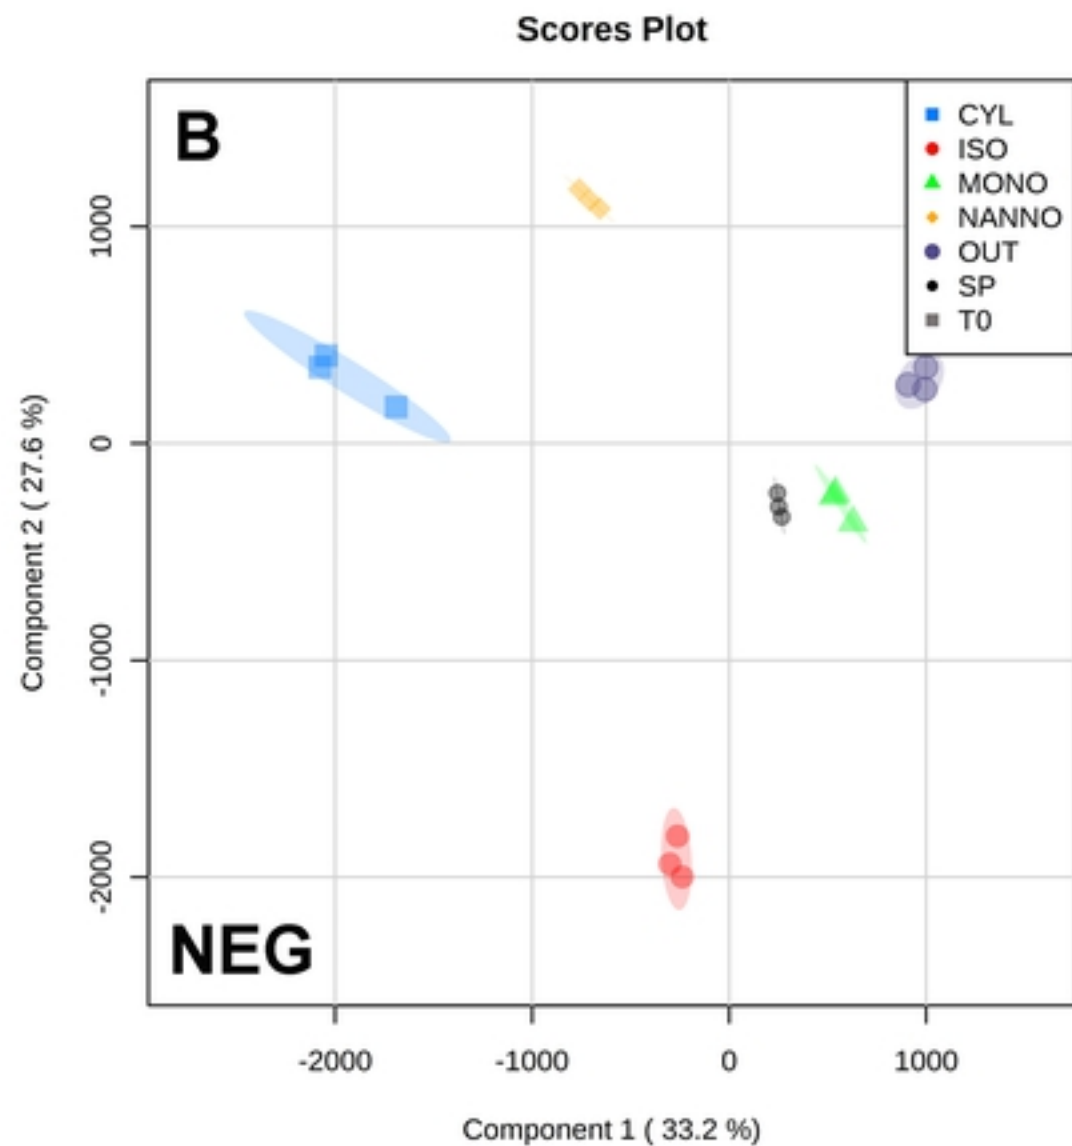

Figure4



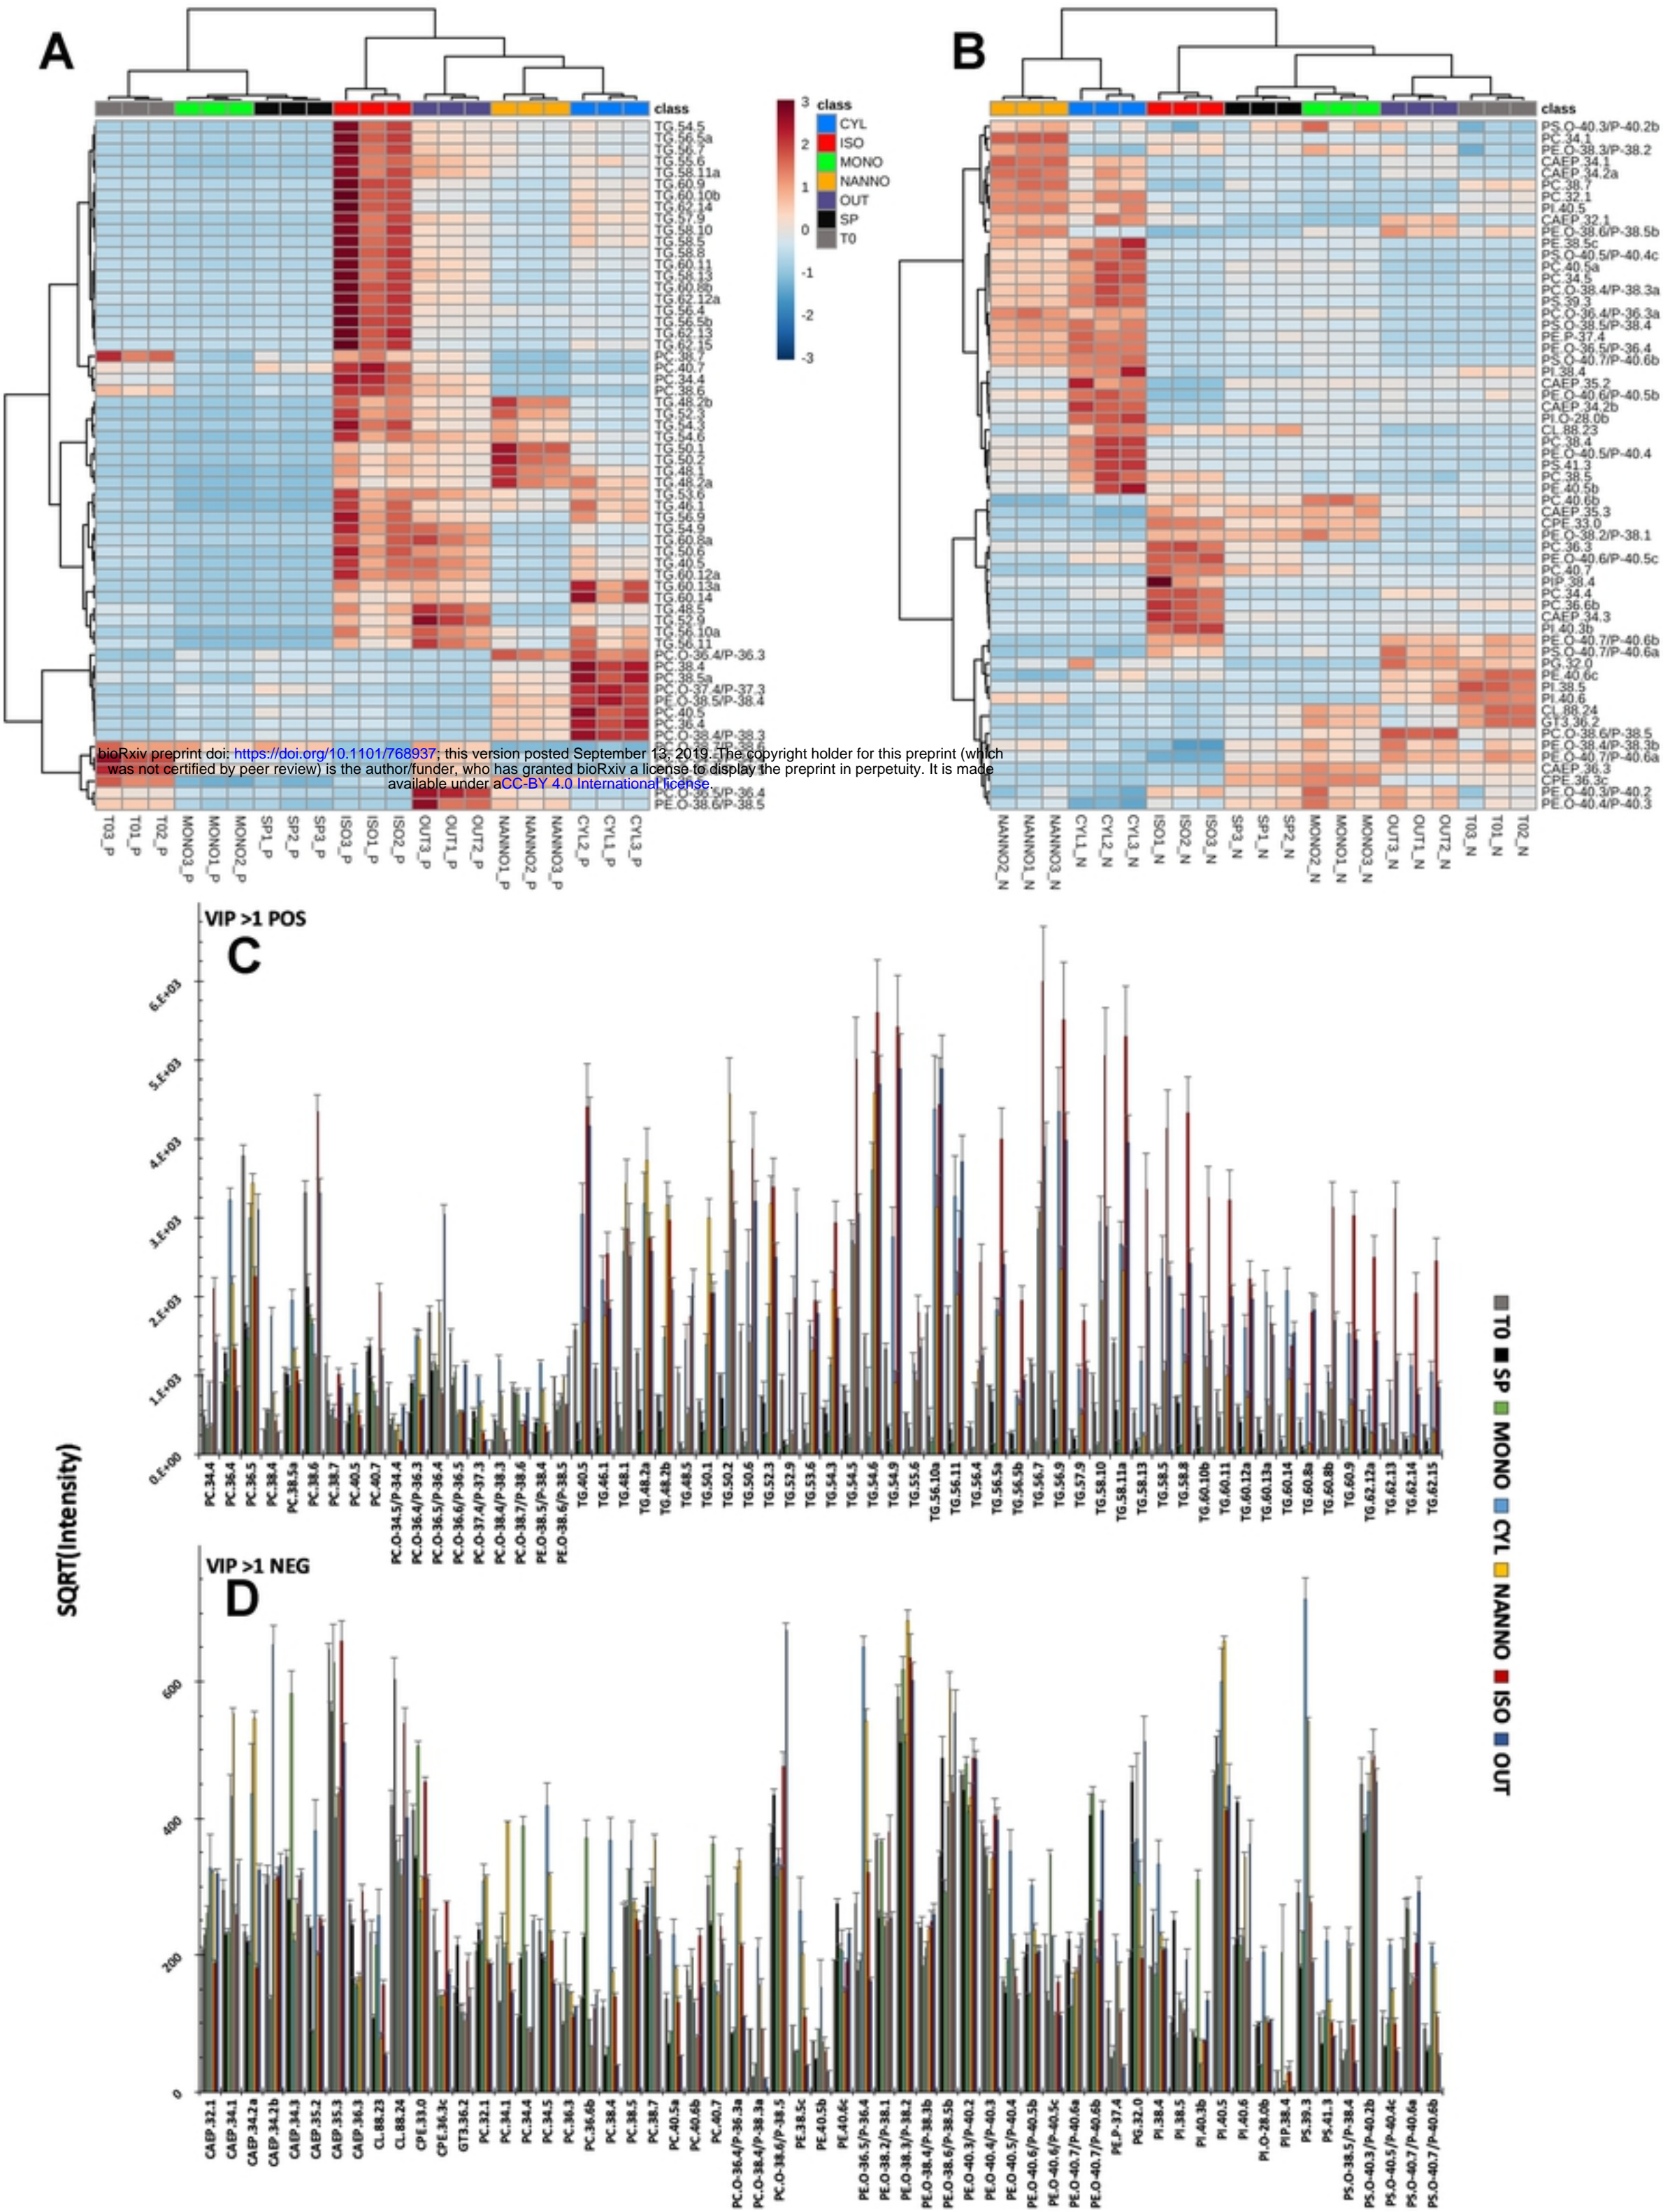

Figure5
